# Supplementary material for: SALL4 promotes angiogenesis in gastric cancer by regulating VEGF expression and targeting SALL4/VEGF pathway inhibits cancer progression
Source: Springer Nature journal article supplement (doi:10.1186/s12935-023-02985-9), 2023-07-31

# VEGF-A

# VEGF-B

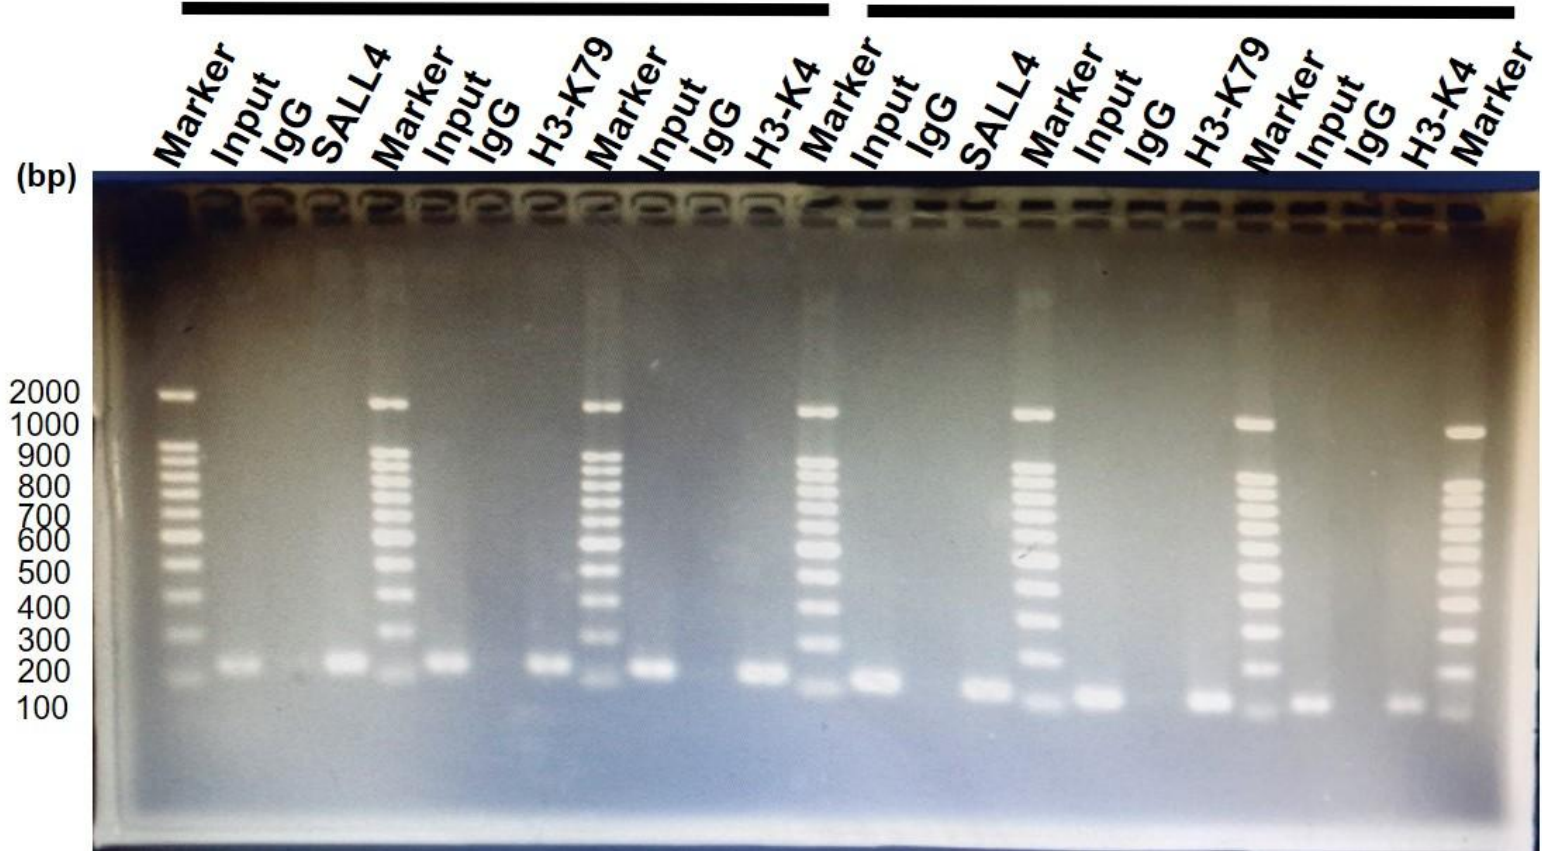

# VEGF-C

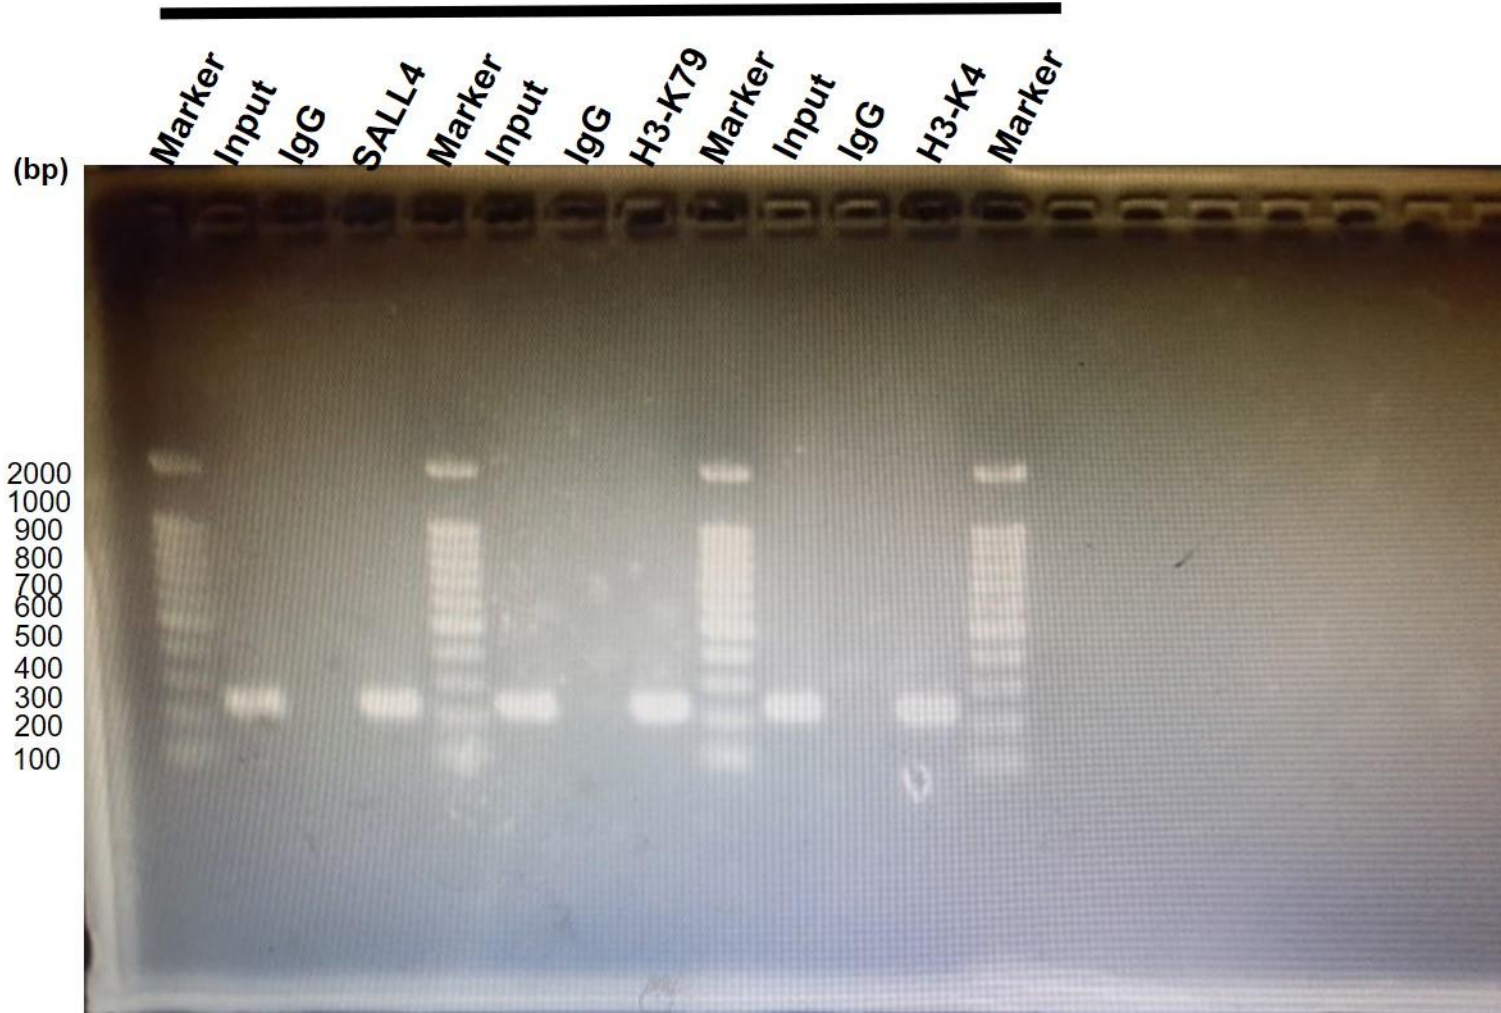

**SYBR Green EMSA**  
DNA stain

**SYPRO Ruby EMSA**  
Protein stain

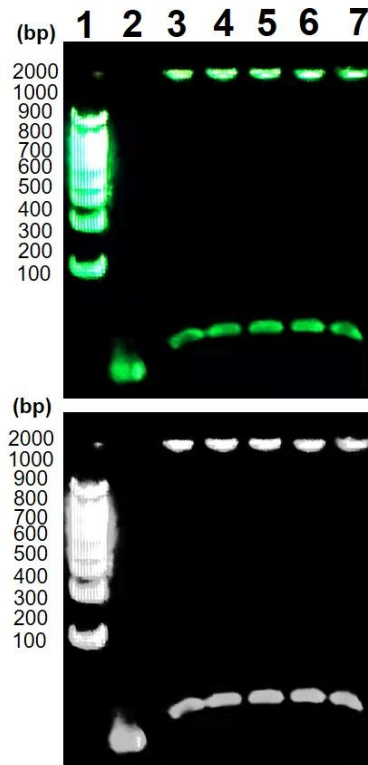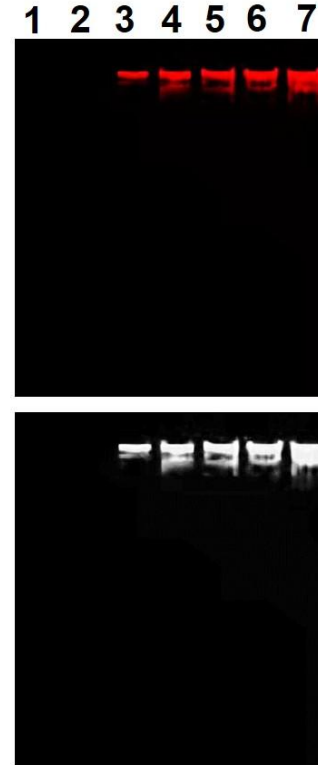

VEGF-A Probe - + + + + + +  
100 ng

Nuclear protein  
(P.SALL4)

|      |   |   |   |   |   |   |   |
|------|---|---|---|---|---|---|---|
| 3ug  | - | - | + | - | - | - | - |
| 5ug  | - | - | - | + | - | - | - |
| 7ug  | - | - | - | - | + | - | - |
| 9ug  | - | - | - | - | - | + | - |
| 11ug | - | - | - | - | - | - | + |

**SYBR Green EMSA DNA stain**      **SYPRO Ruby EMSA protein stain**

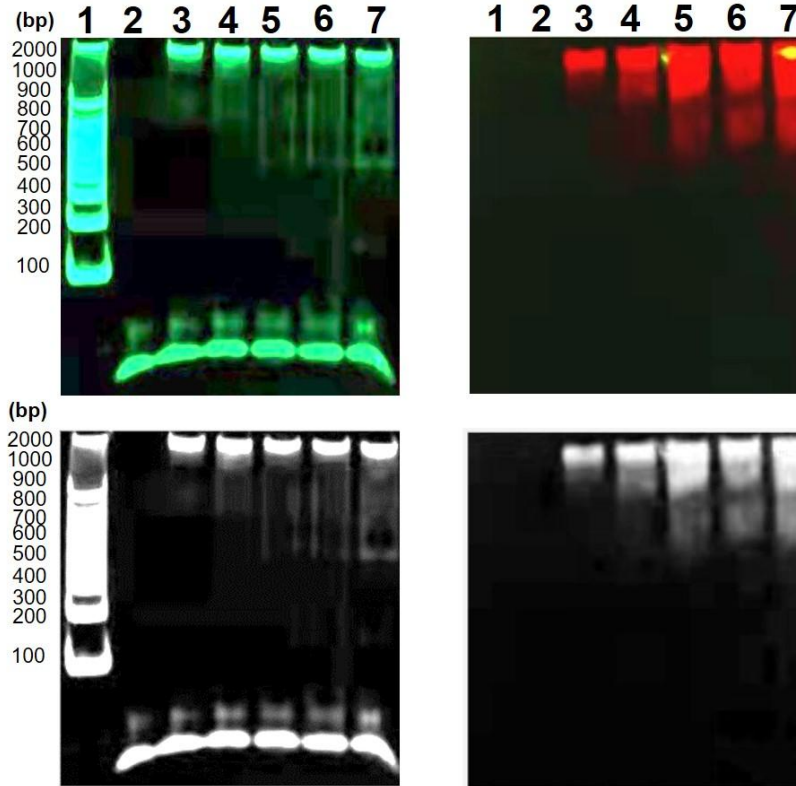

VEGF-B Probe      -    +    +    +    +    +    +  
 100 ng

Nuclear protein  
 (P.SALL4)

|      |   |   |   |   |   |   |   |
|------|---|---|---|---|---|---|---|
| 3ug  | - | - | + | - | - | - | - |
| 5ug  | - | - | - | + | - | - | - |
| 7ug  | - | - | - | - | + | - | - |
| 9ug  | - | - | - | - | - | + | - |
| 11ug | - | - | - | - | - | - | + |

**SYBR Green EMSA DNA stain**      **SYPRO Ruby EMSA protein stain**

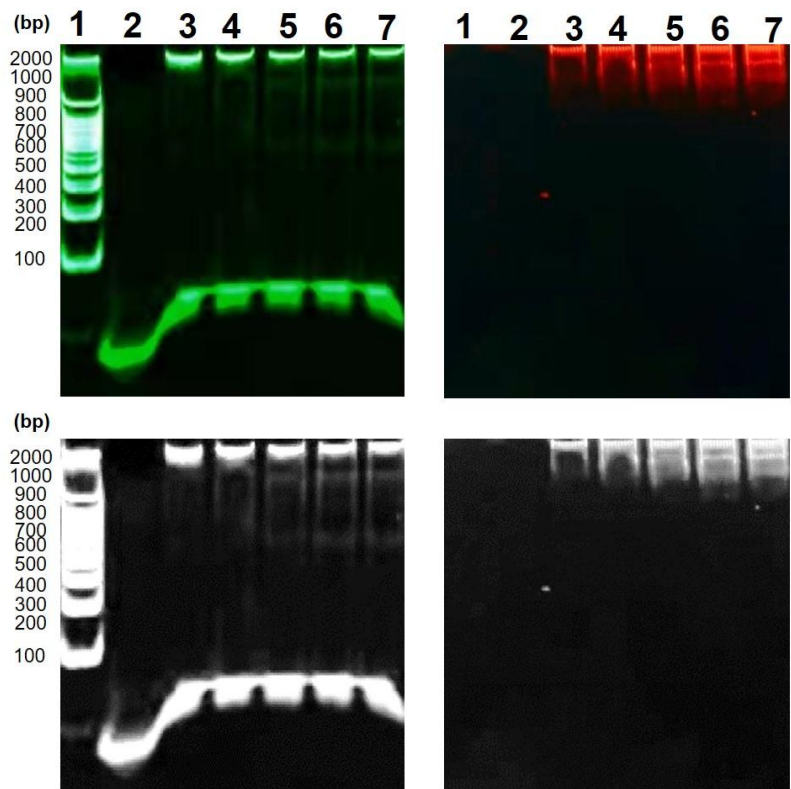

|                        |   |   |   |   |   |   |   |
|------------------------|---|---|---|---|---|---|---|
| <b>VEGF-C Probe</b>    | - | + | + | + | + | + | + |
| <b>100 ng</b>          |   |   |   |   |   |   |   |
| <b>Nuclear protein</b> |   |   |   |   |   |   |   |
| <b>(P.SALL4)</b>       |   |   |   |   |   |   |   |
| <b>3ug</b>             | - | - | + | - | - | - | - |
| <b>5ug</b>             | - | - | - | + | - | - | - |
| <b>7ug</b>             | - | - | - | - | + | - | - |
| <b>9ug</b>             | - | - | - | - | - | + | - |
| <b>11ug</b>            | - | - | - | - | - | - | + |

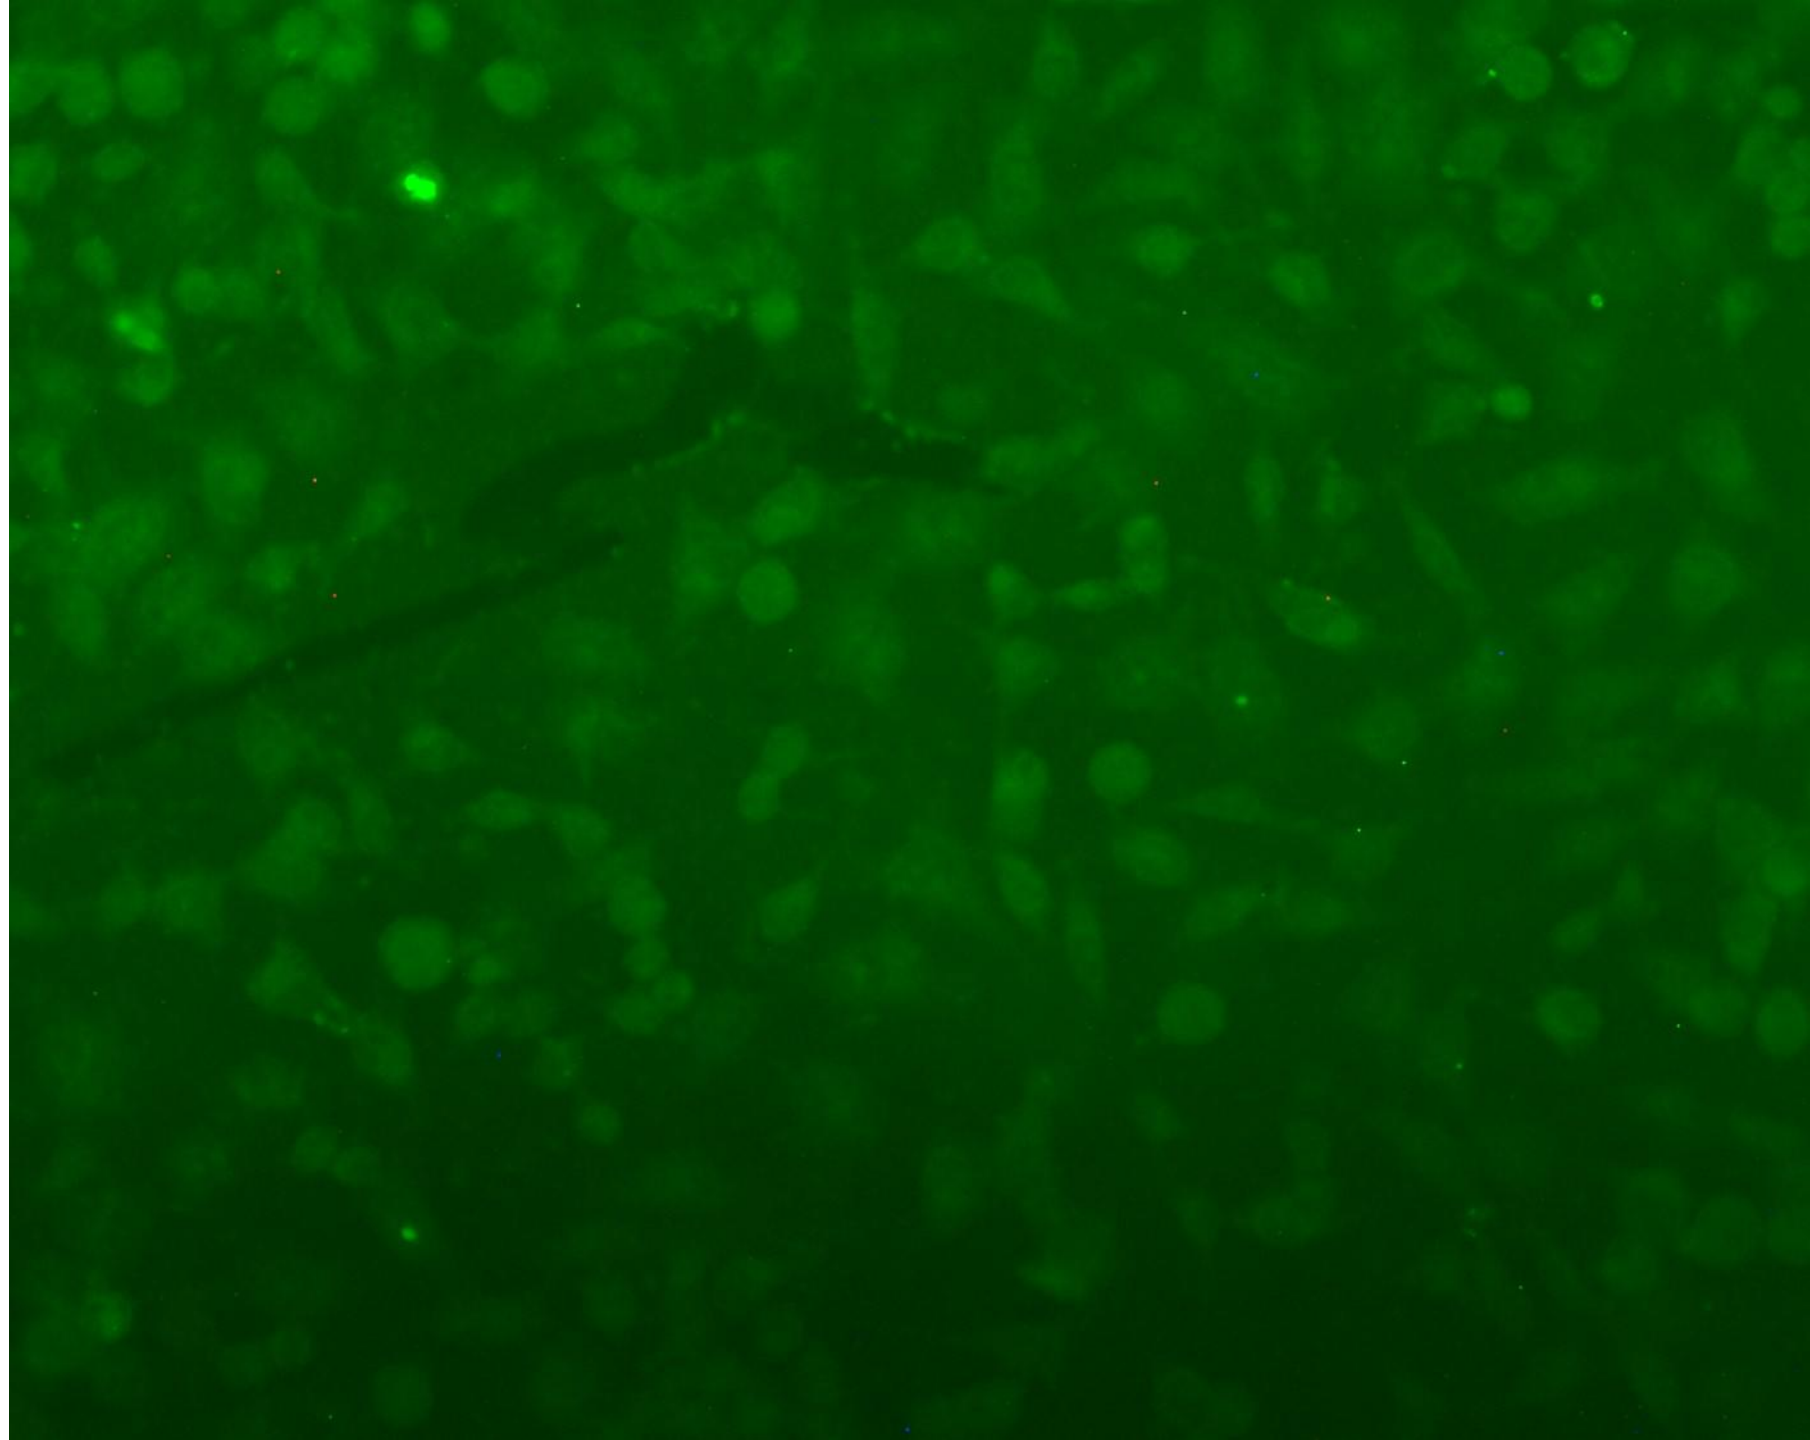

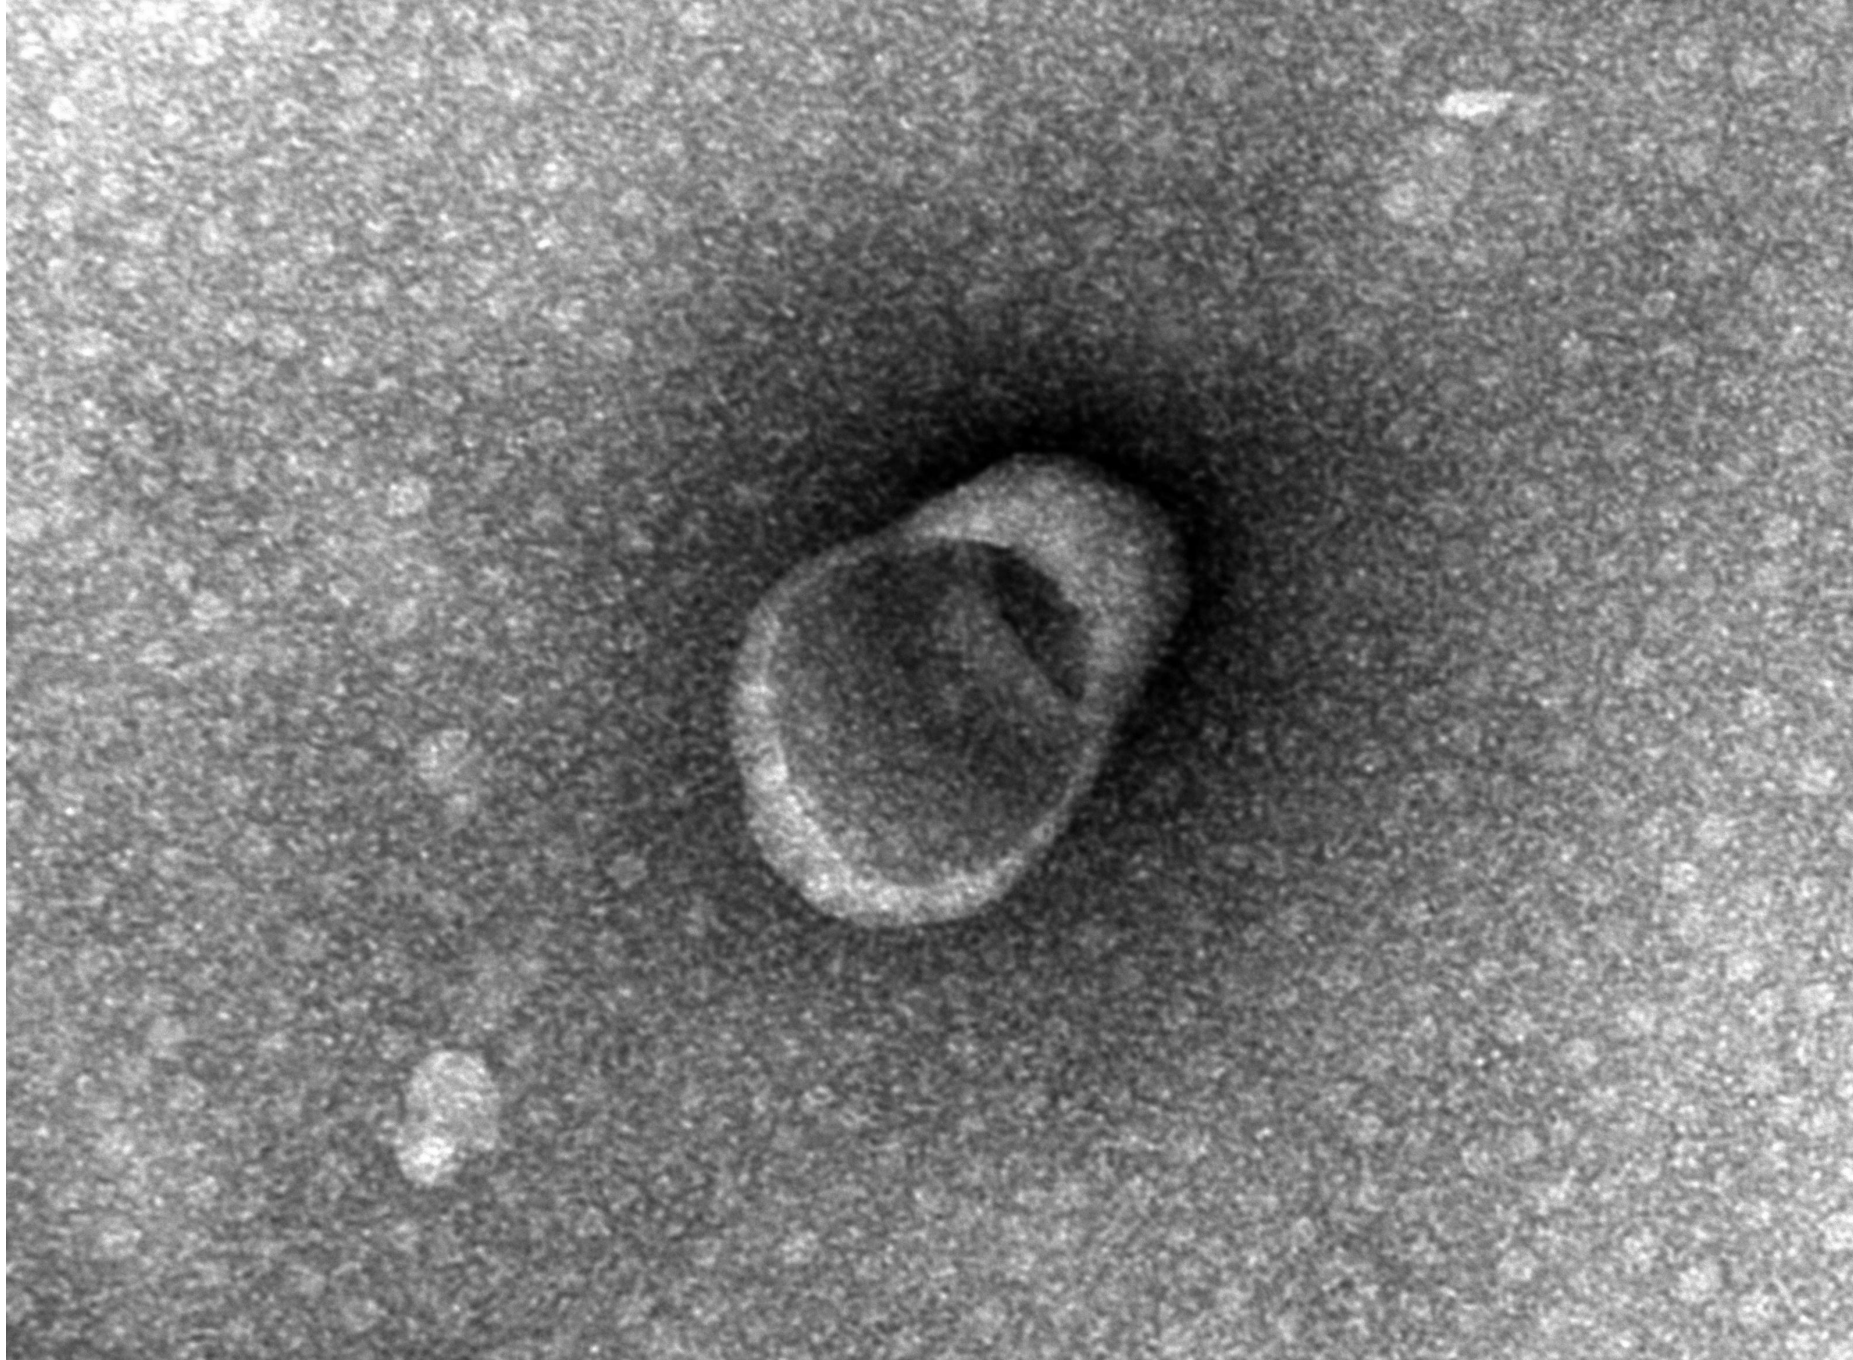

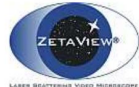

Operator (Report): ZetaView  
Video Operator: ZetaView

**Sample Parameters**

Sample Name: gp2  
Comment: Sample Remarks0:  
Sample Remarks1:  
Sample Remarks2:  
Electrolyte:  
Temperature: 27.93 °C sensed  
pH 7.0 entered  
Conductivity: 25.34 µS/cm sensed

**Instrument Parameters**

Laser Wavelength: 488 nm  
Filter Wavelength: Scatter

**Measurement Parameters**

Cell S/N: ZNTA

**Result (sizes in nm)**

|              | Number | Concentration | Volume |
|--------------|--------|---------------|--------|
| Median (X50) | 142.5  | 142.5         | 241.3  |
| Span         | 68.7   | 68.7          | 165.9  |

Concentration: 2.1E+8 Particles / mL  
Dilution Factor: 3000  
Original Concentration: 6.4E+11 Particles / mL

**Quality**

Average Counted Particles per Frame: 612  
Number of Traced Particles: 5167

**Measurement Mode: Size Distribution 2 Cycles**

11 Positions

**Analysis Parameters**

Max Area: 1000, Min Area: 5, Min Brightness: 20

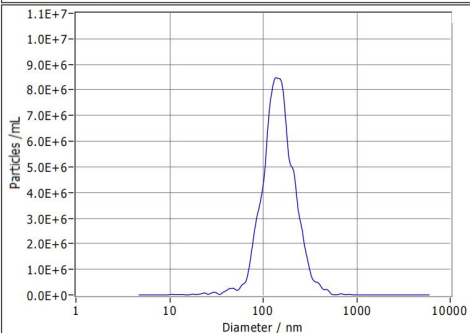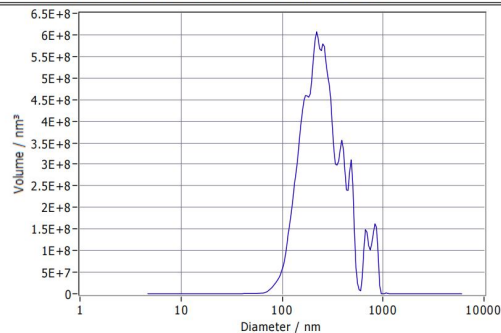

**Peak Analysis (Concentration)**

| Diameter / nm | Particles/mL | FWHM / nm | Percentage |
|---------------|--------------|-----------|------------|
| 140.6         | 8.5E+6       | 123.7     | 100.0      |

**X Values** (all sizes are given in nm)

|        | Number | Concentration | Volume |
|--------|--------|---------------|--------|
| X10    | 87.5   | 87.5          | 139.0  |
| X50    | 142.5  | 142.5         | 241.3  |
| X90    | 236.4  | 236.4         | 481.5  |
| Span   | 1.0    | 1.0           | 1.4    |
| Mean   | 158.0  | 158.0         | 293.2  |
| StdDev | 68.7   | 68.7          | 165.9  |

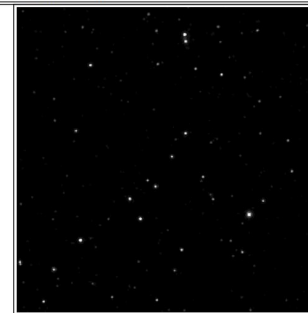

Comment

(Signature)



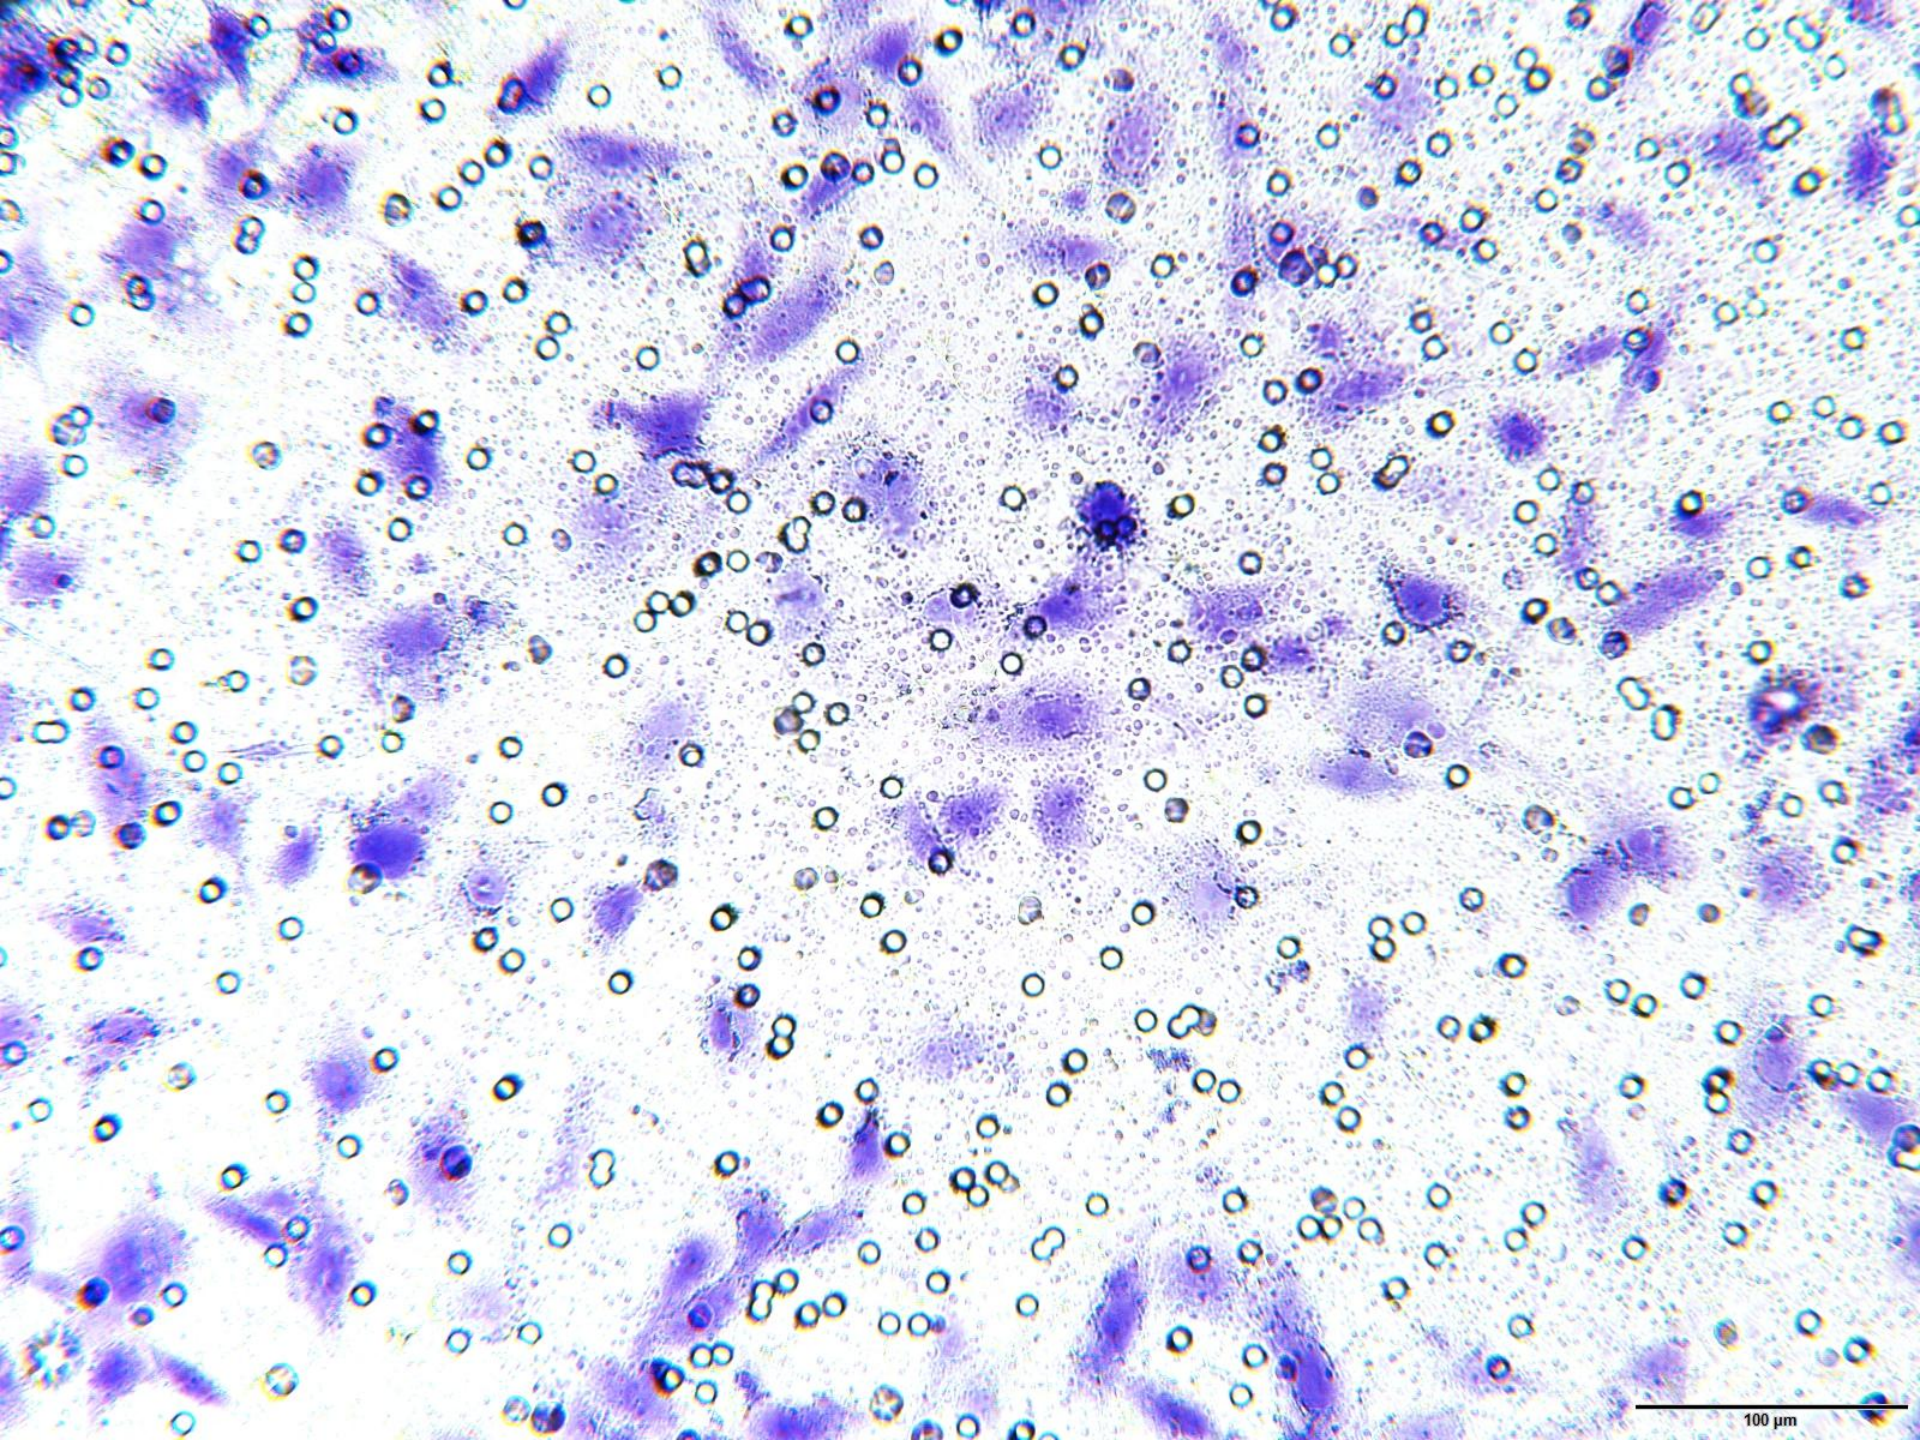

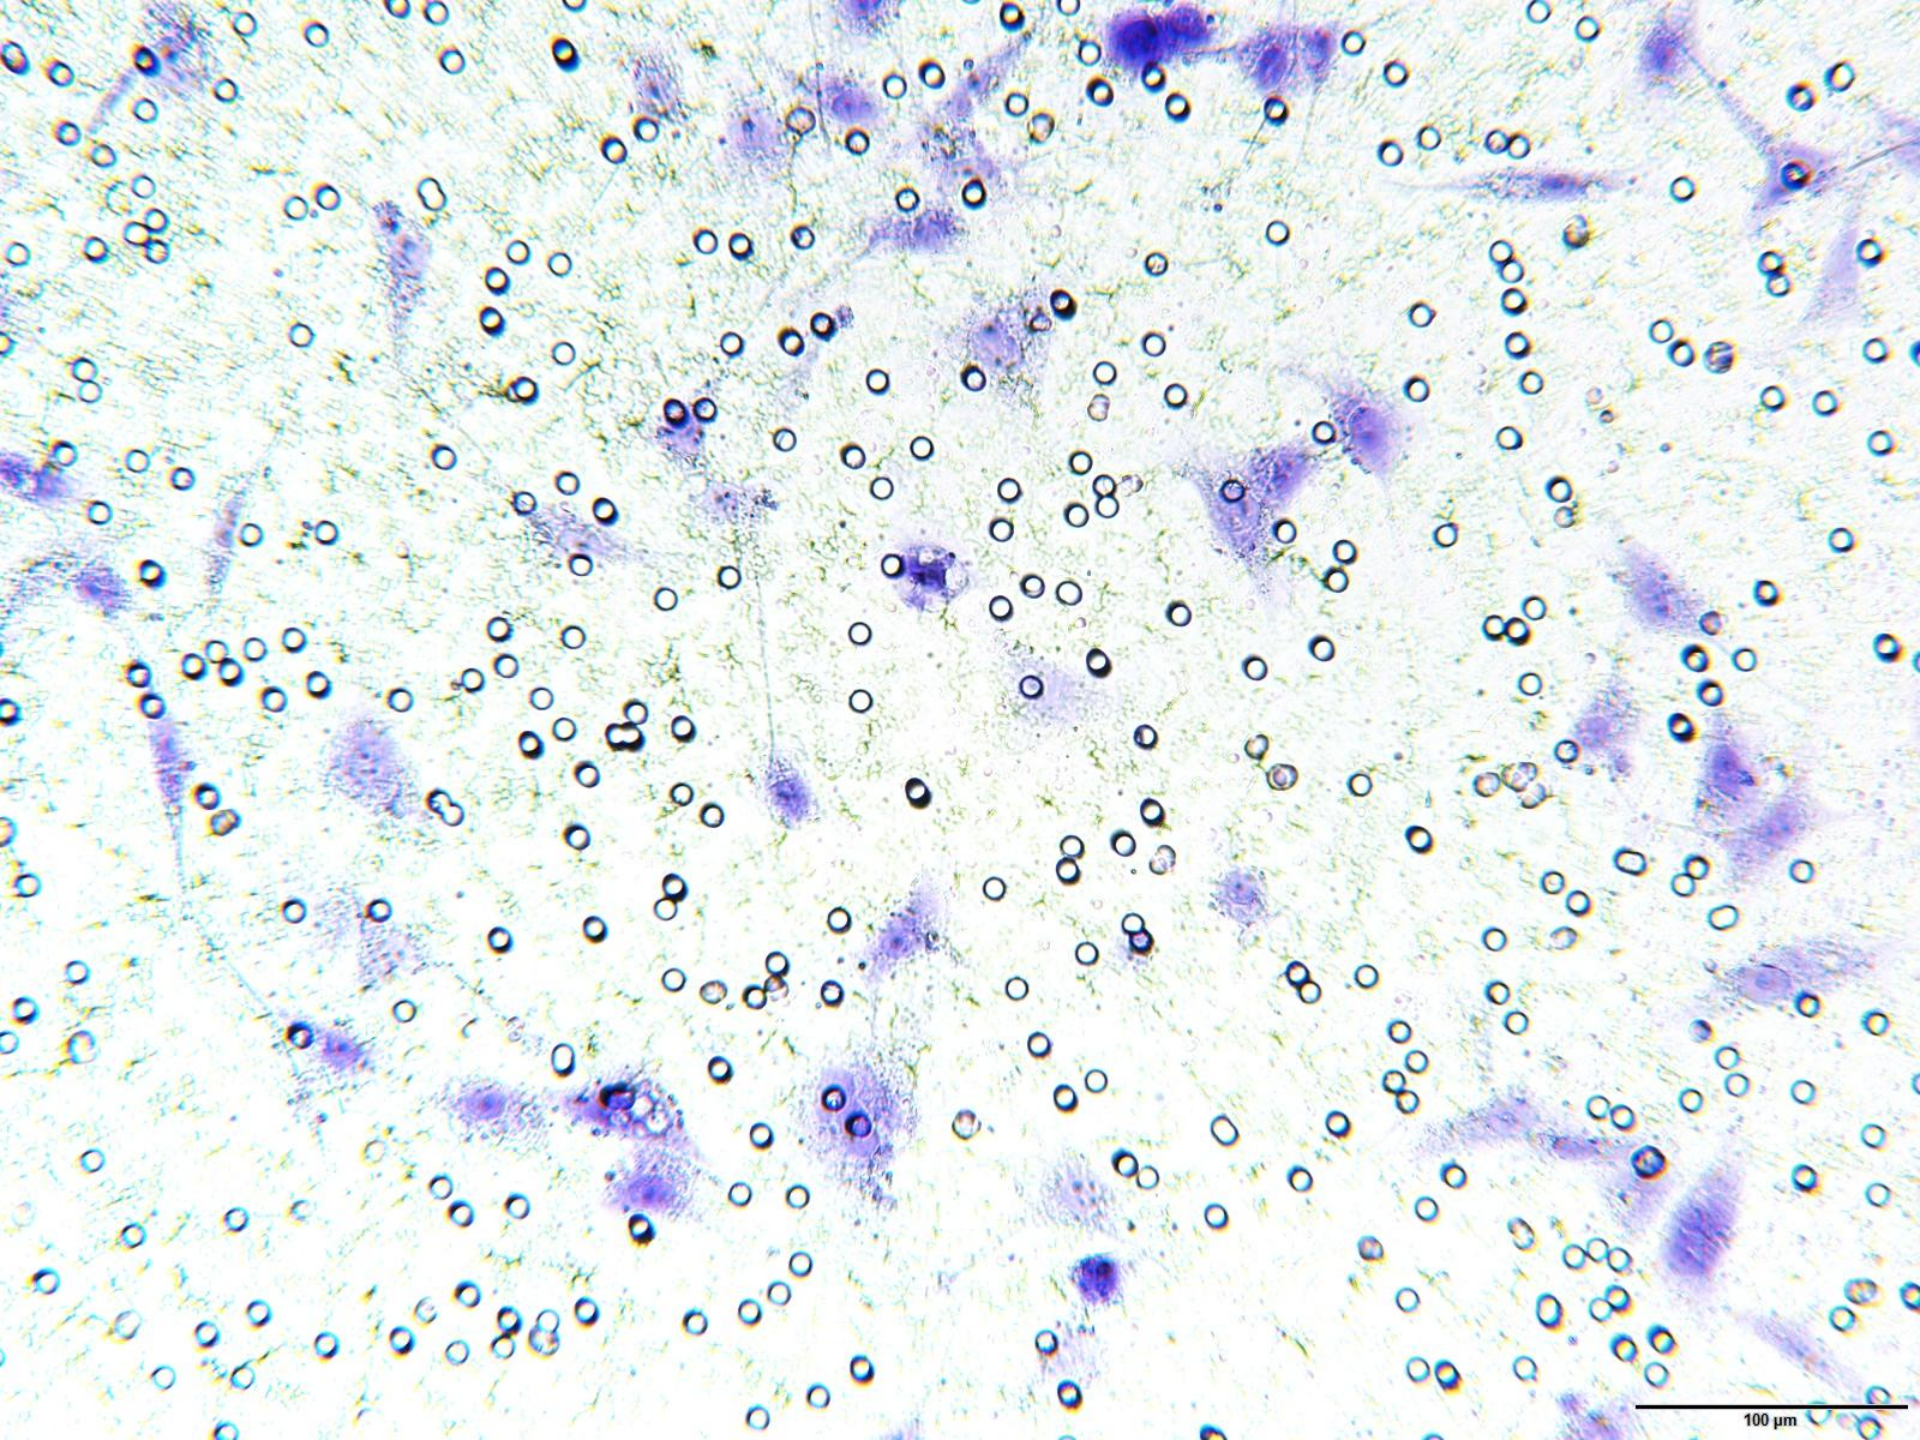

100  $\mu$ m

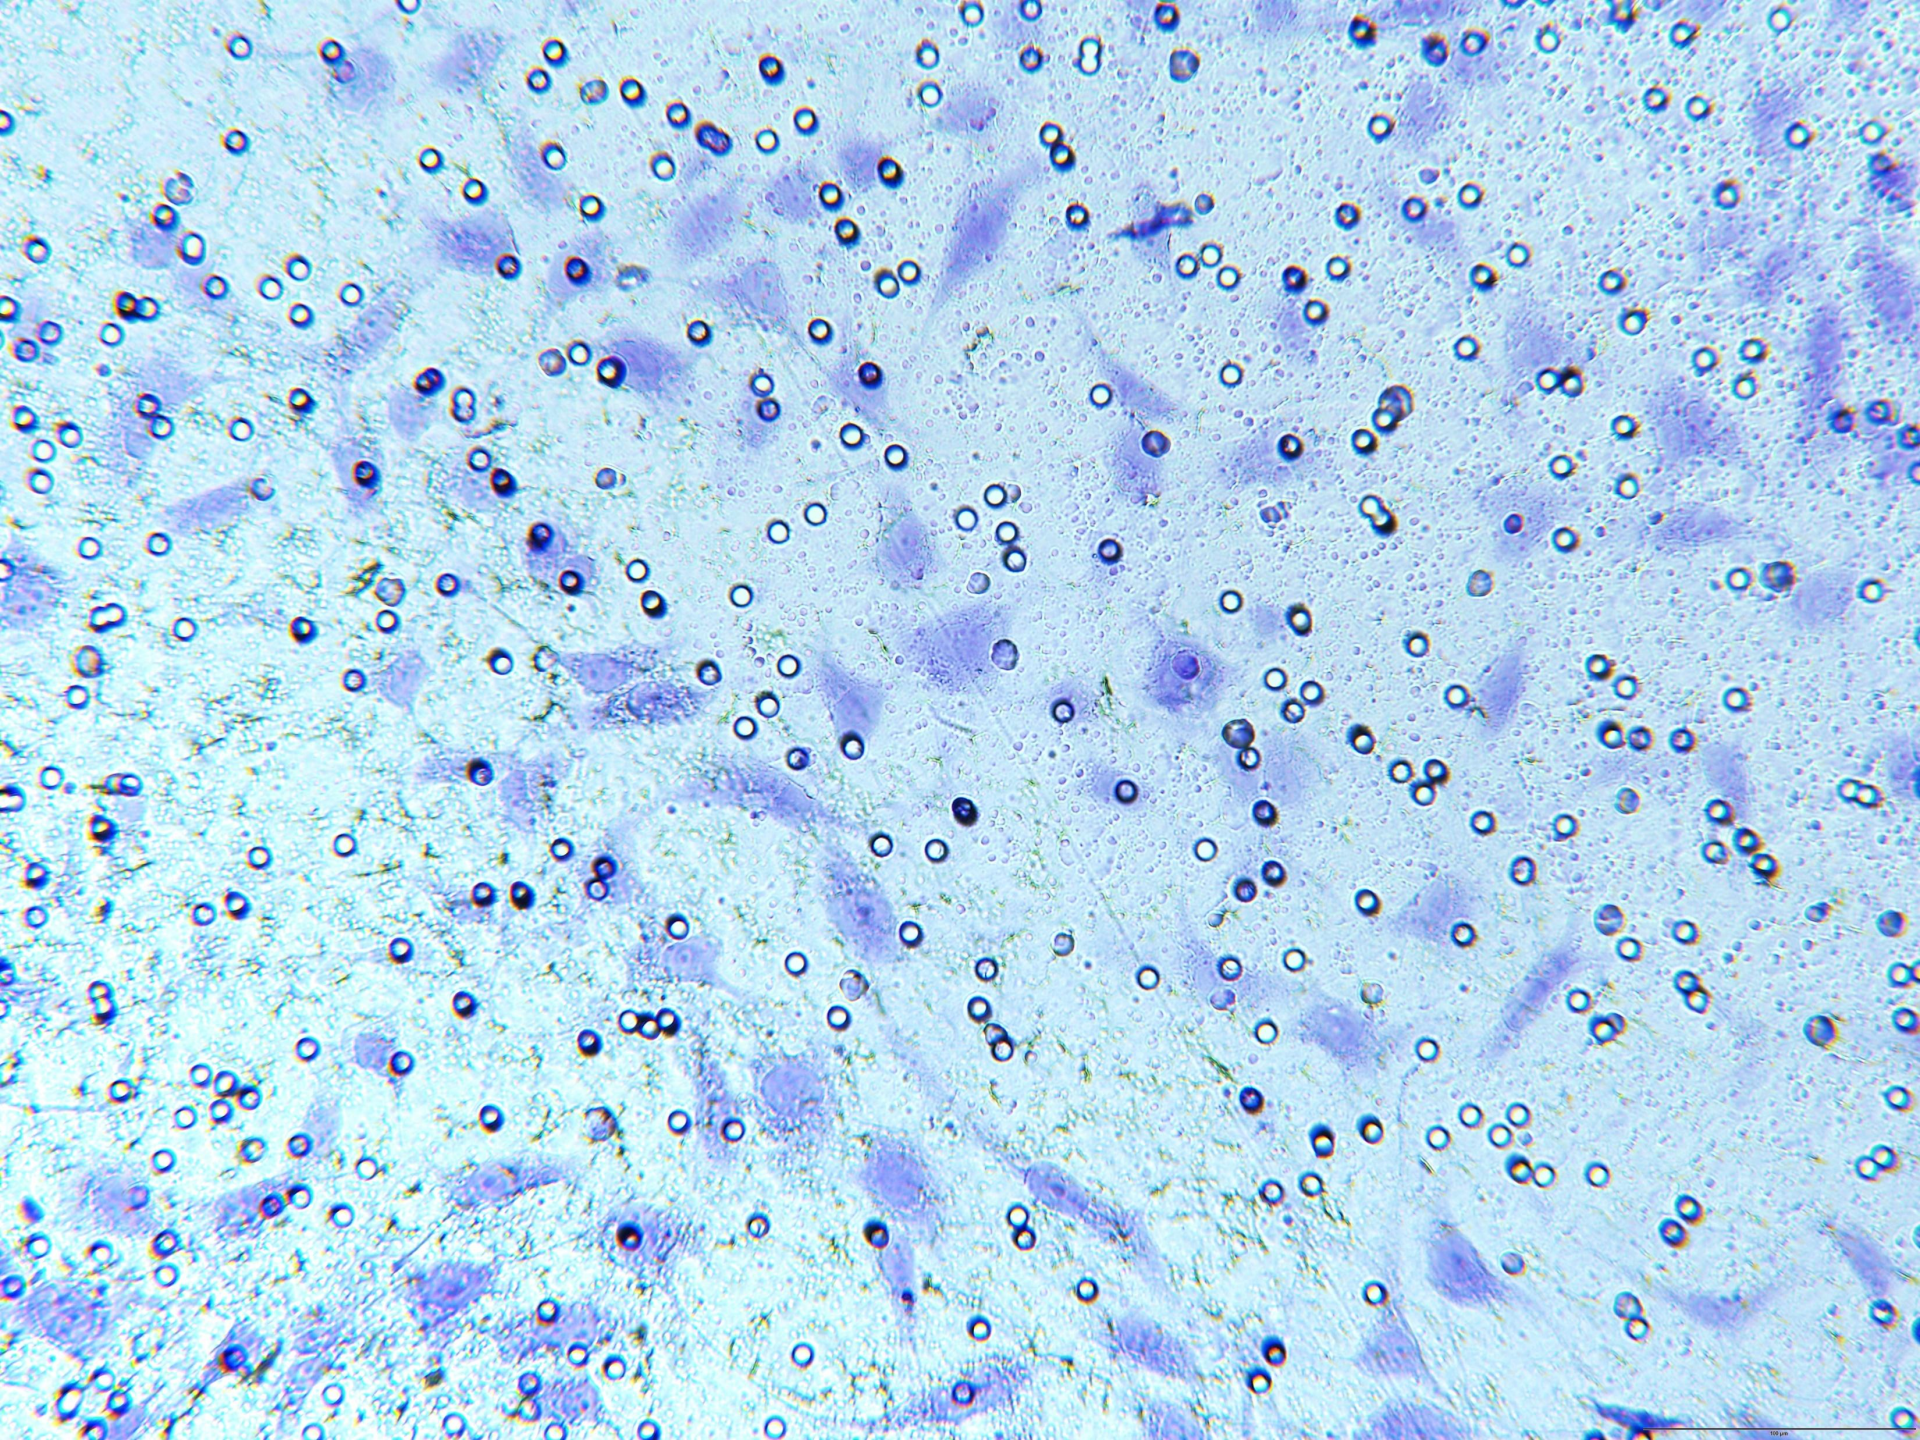

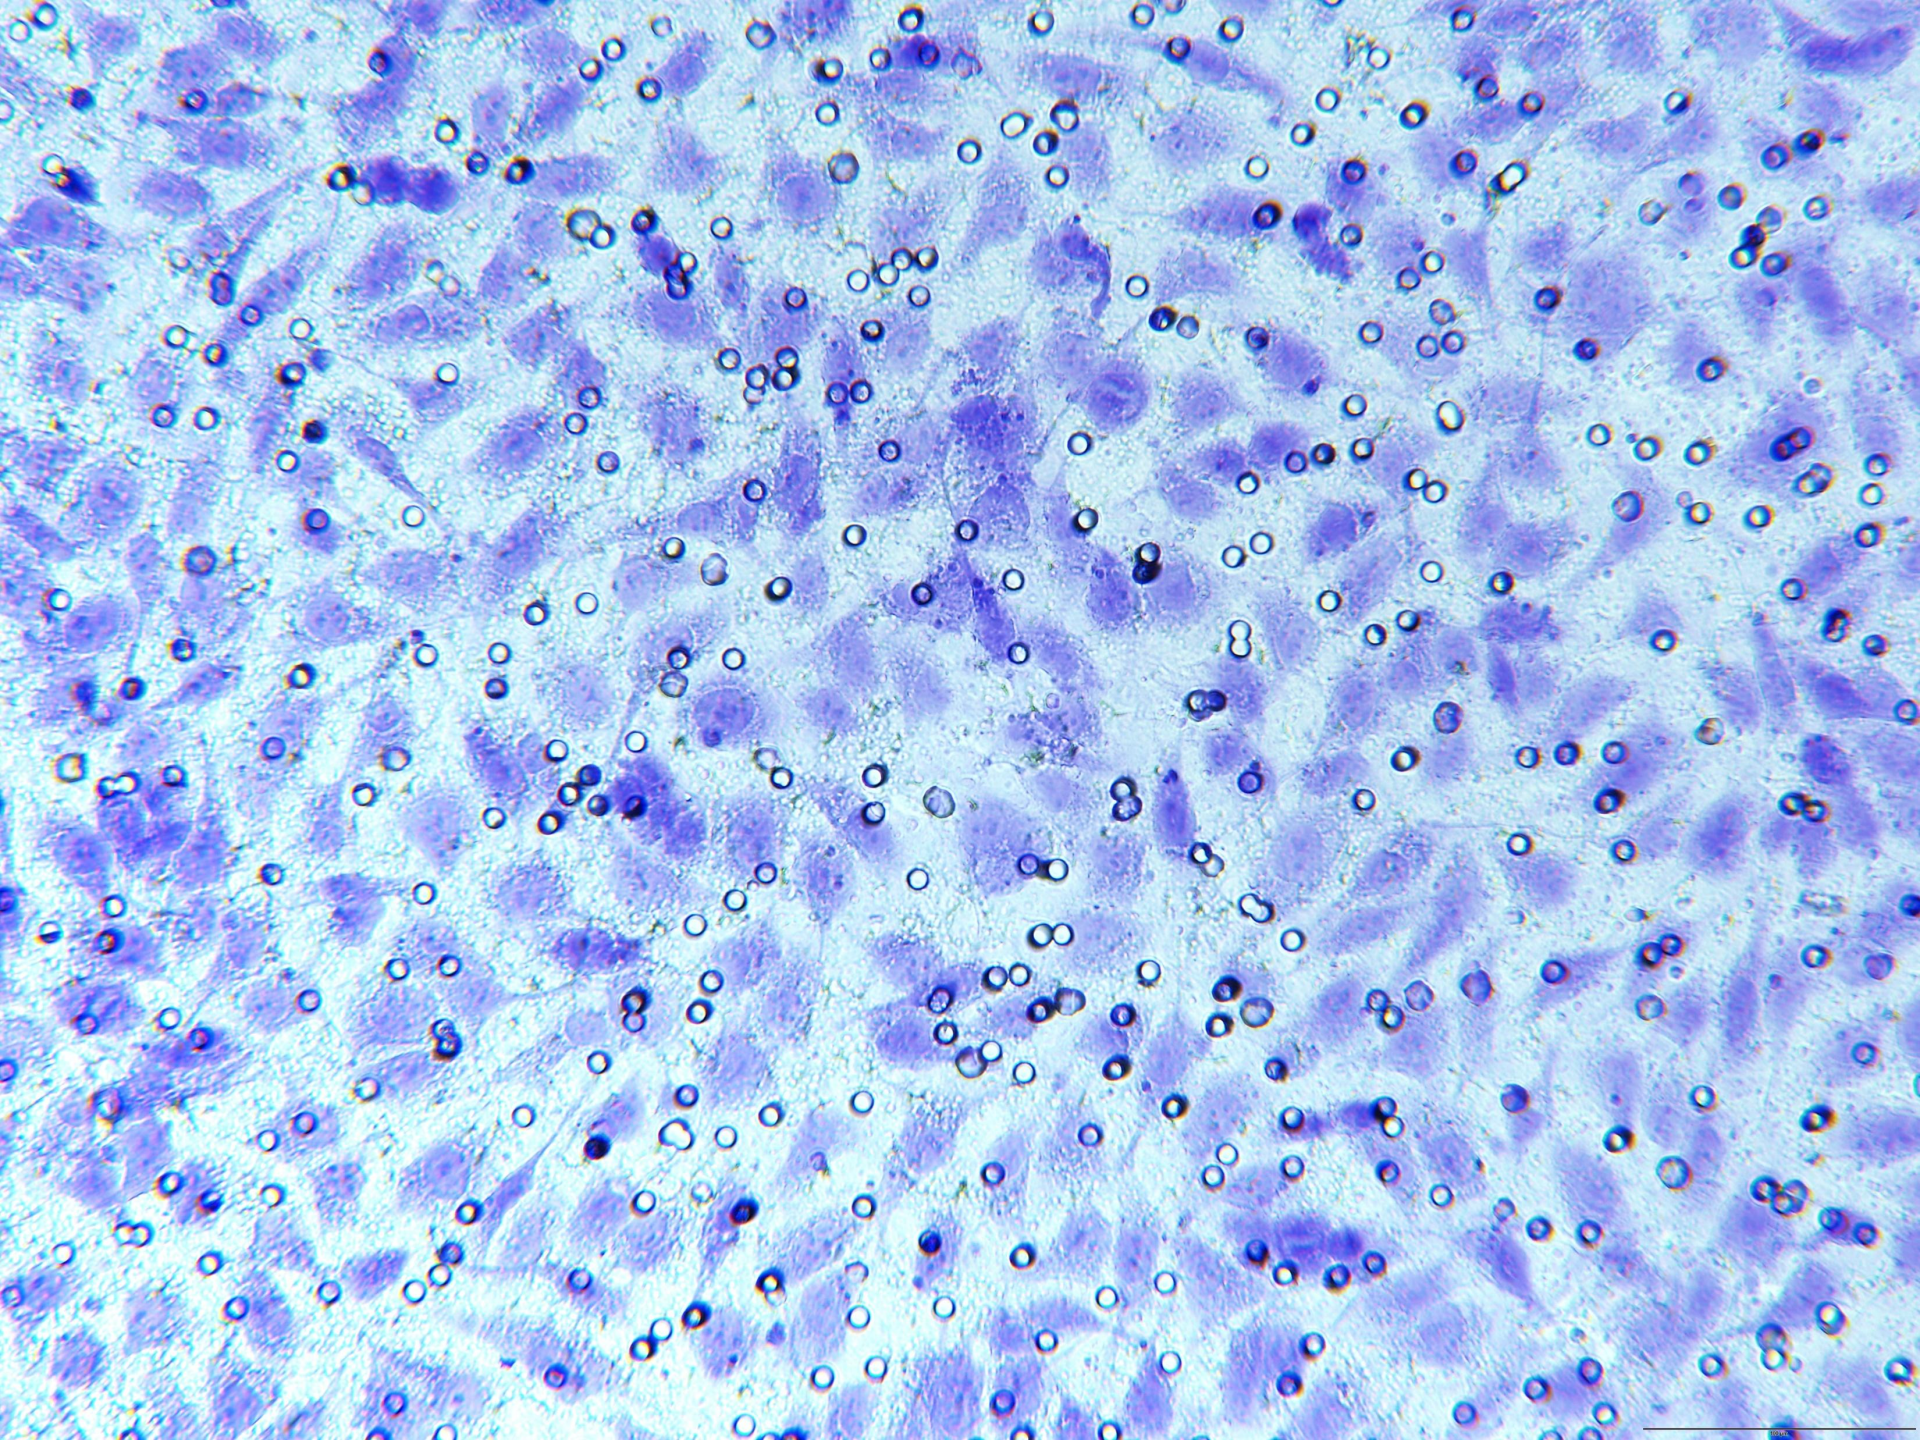

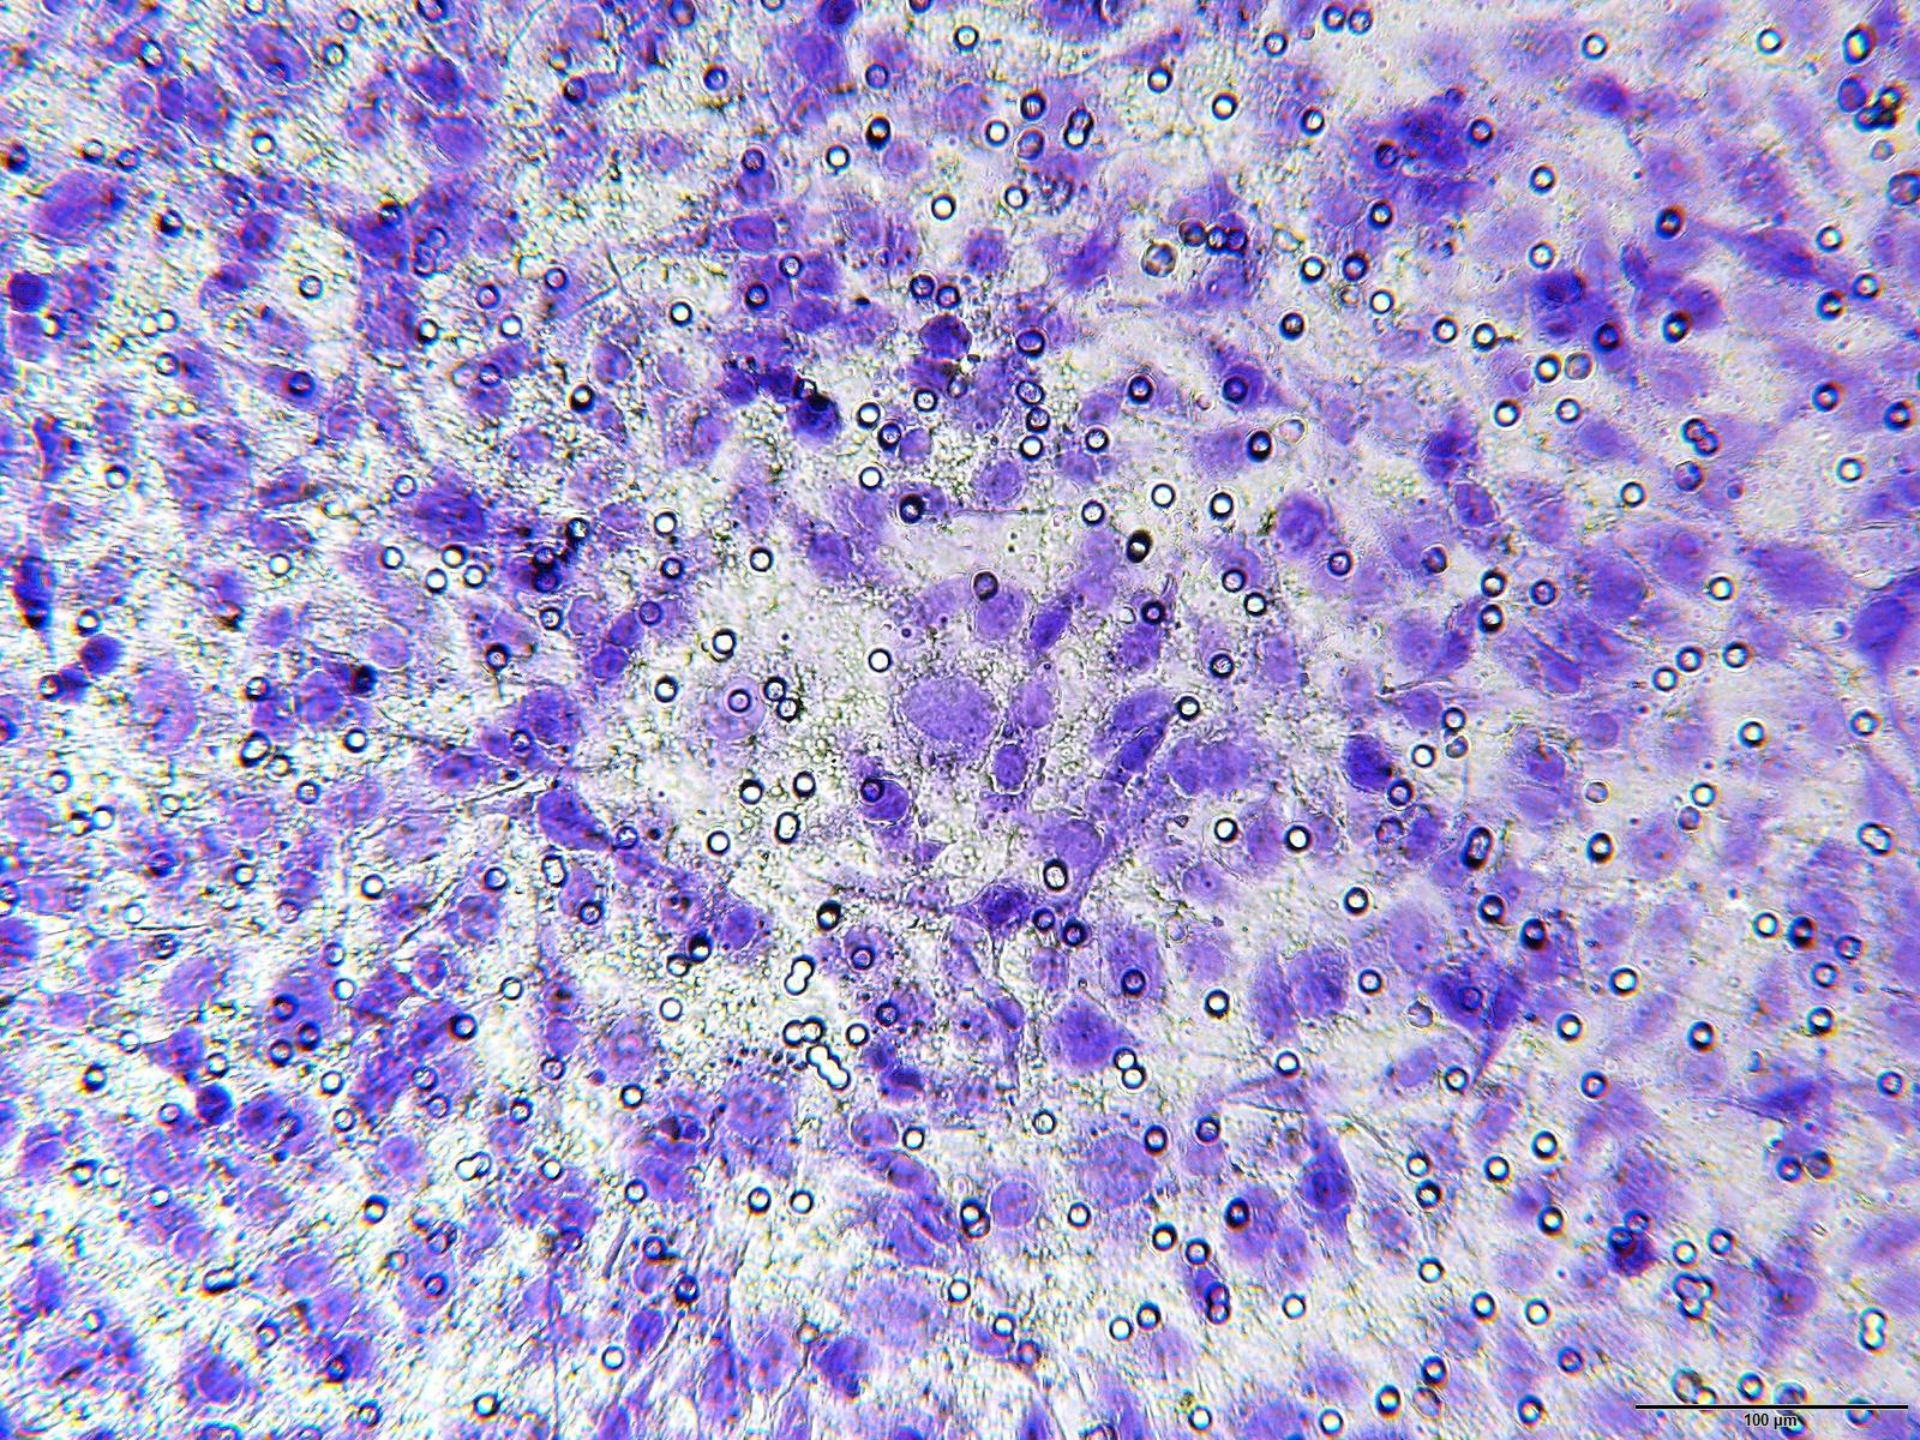

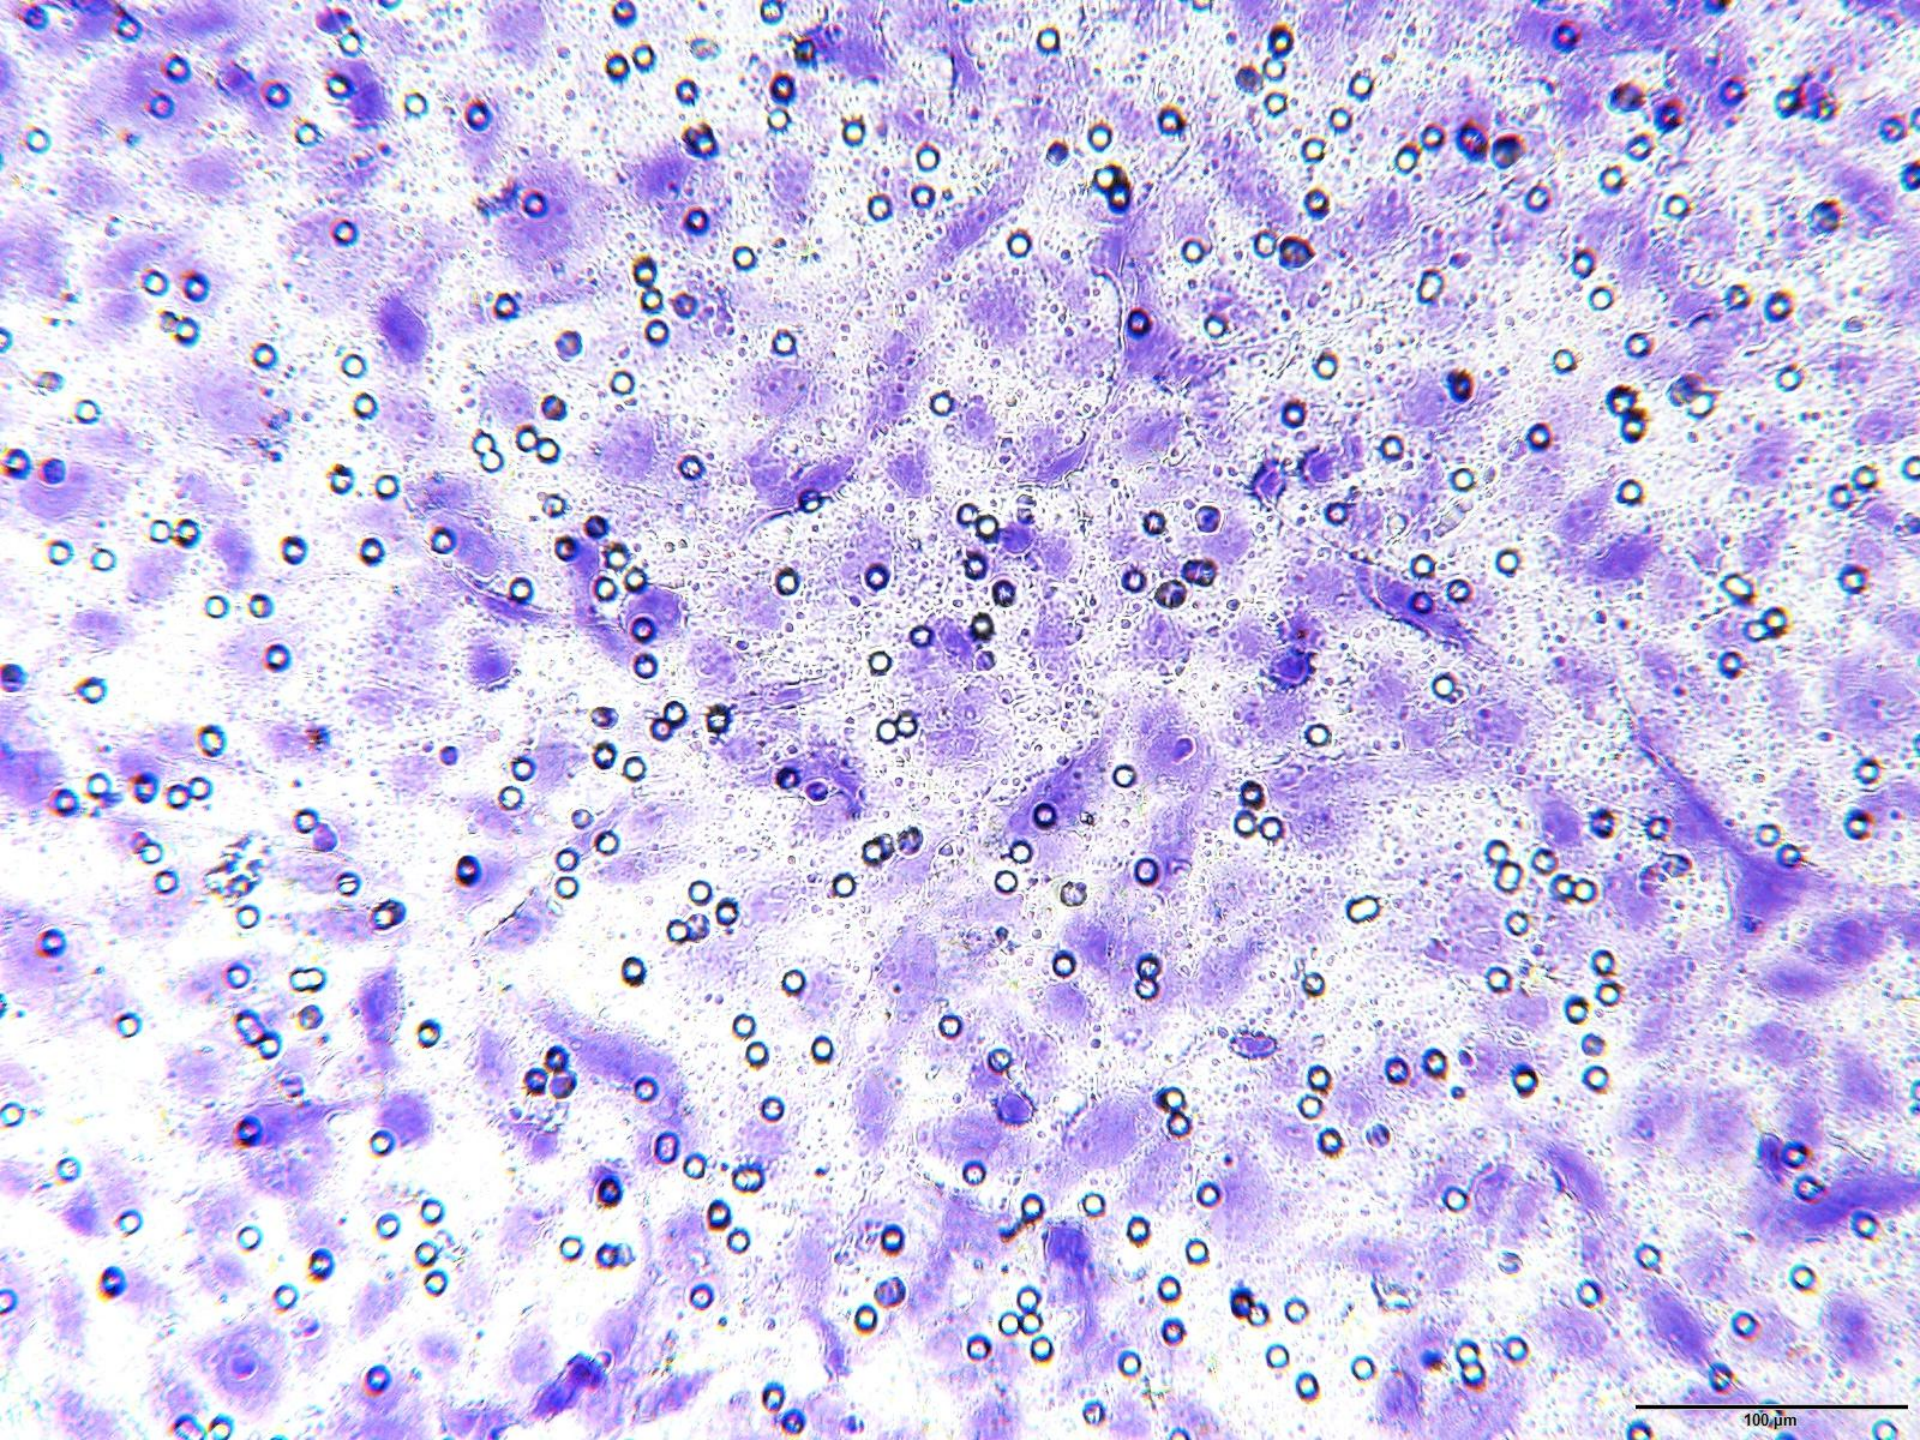

100  $\mu$ m

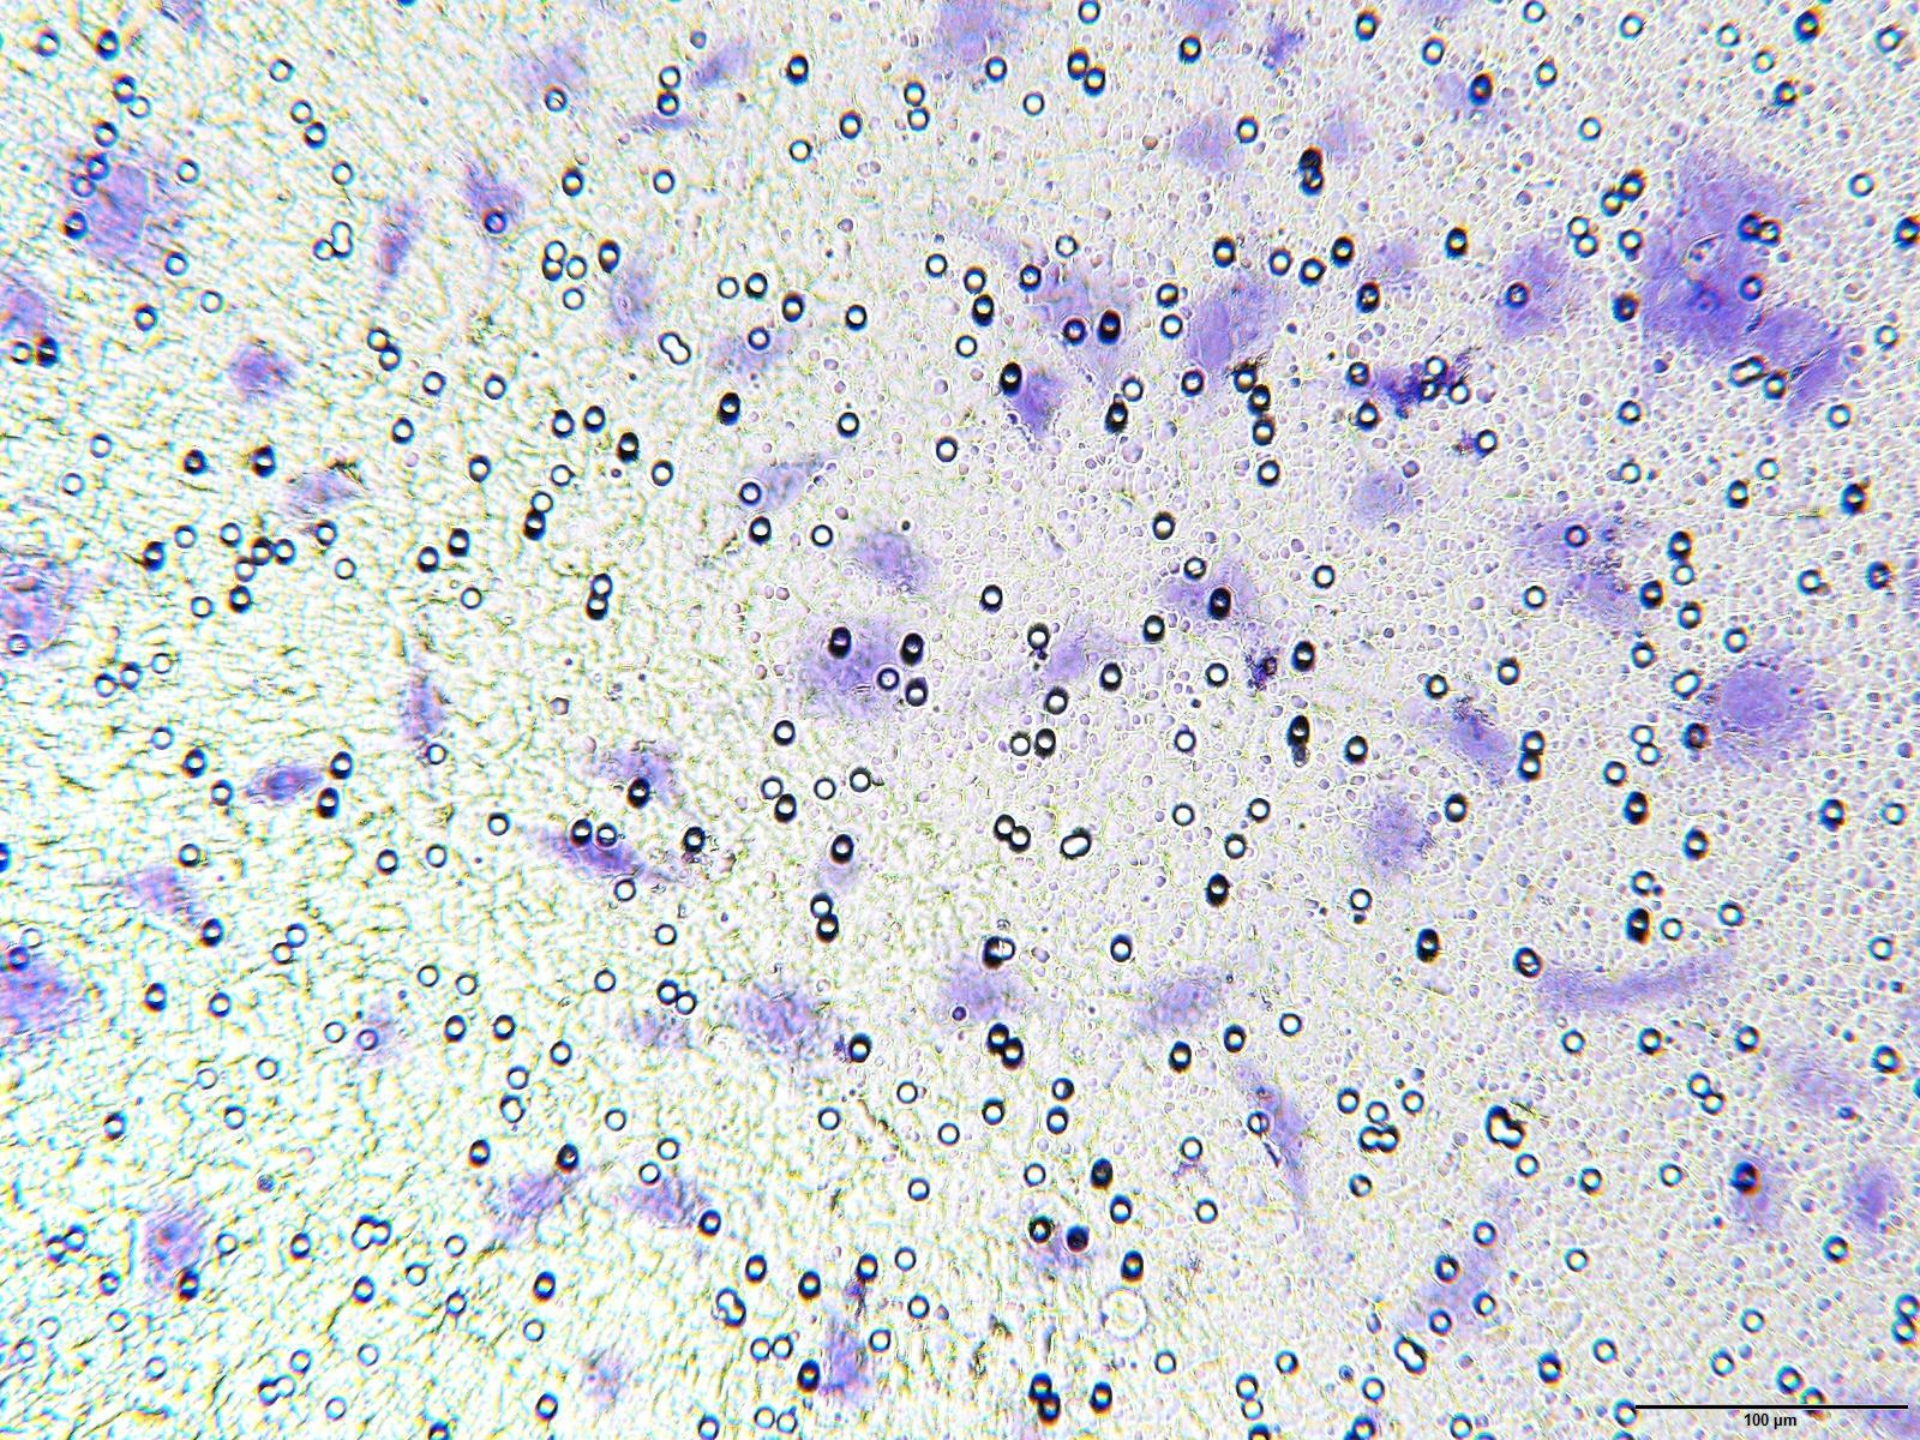

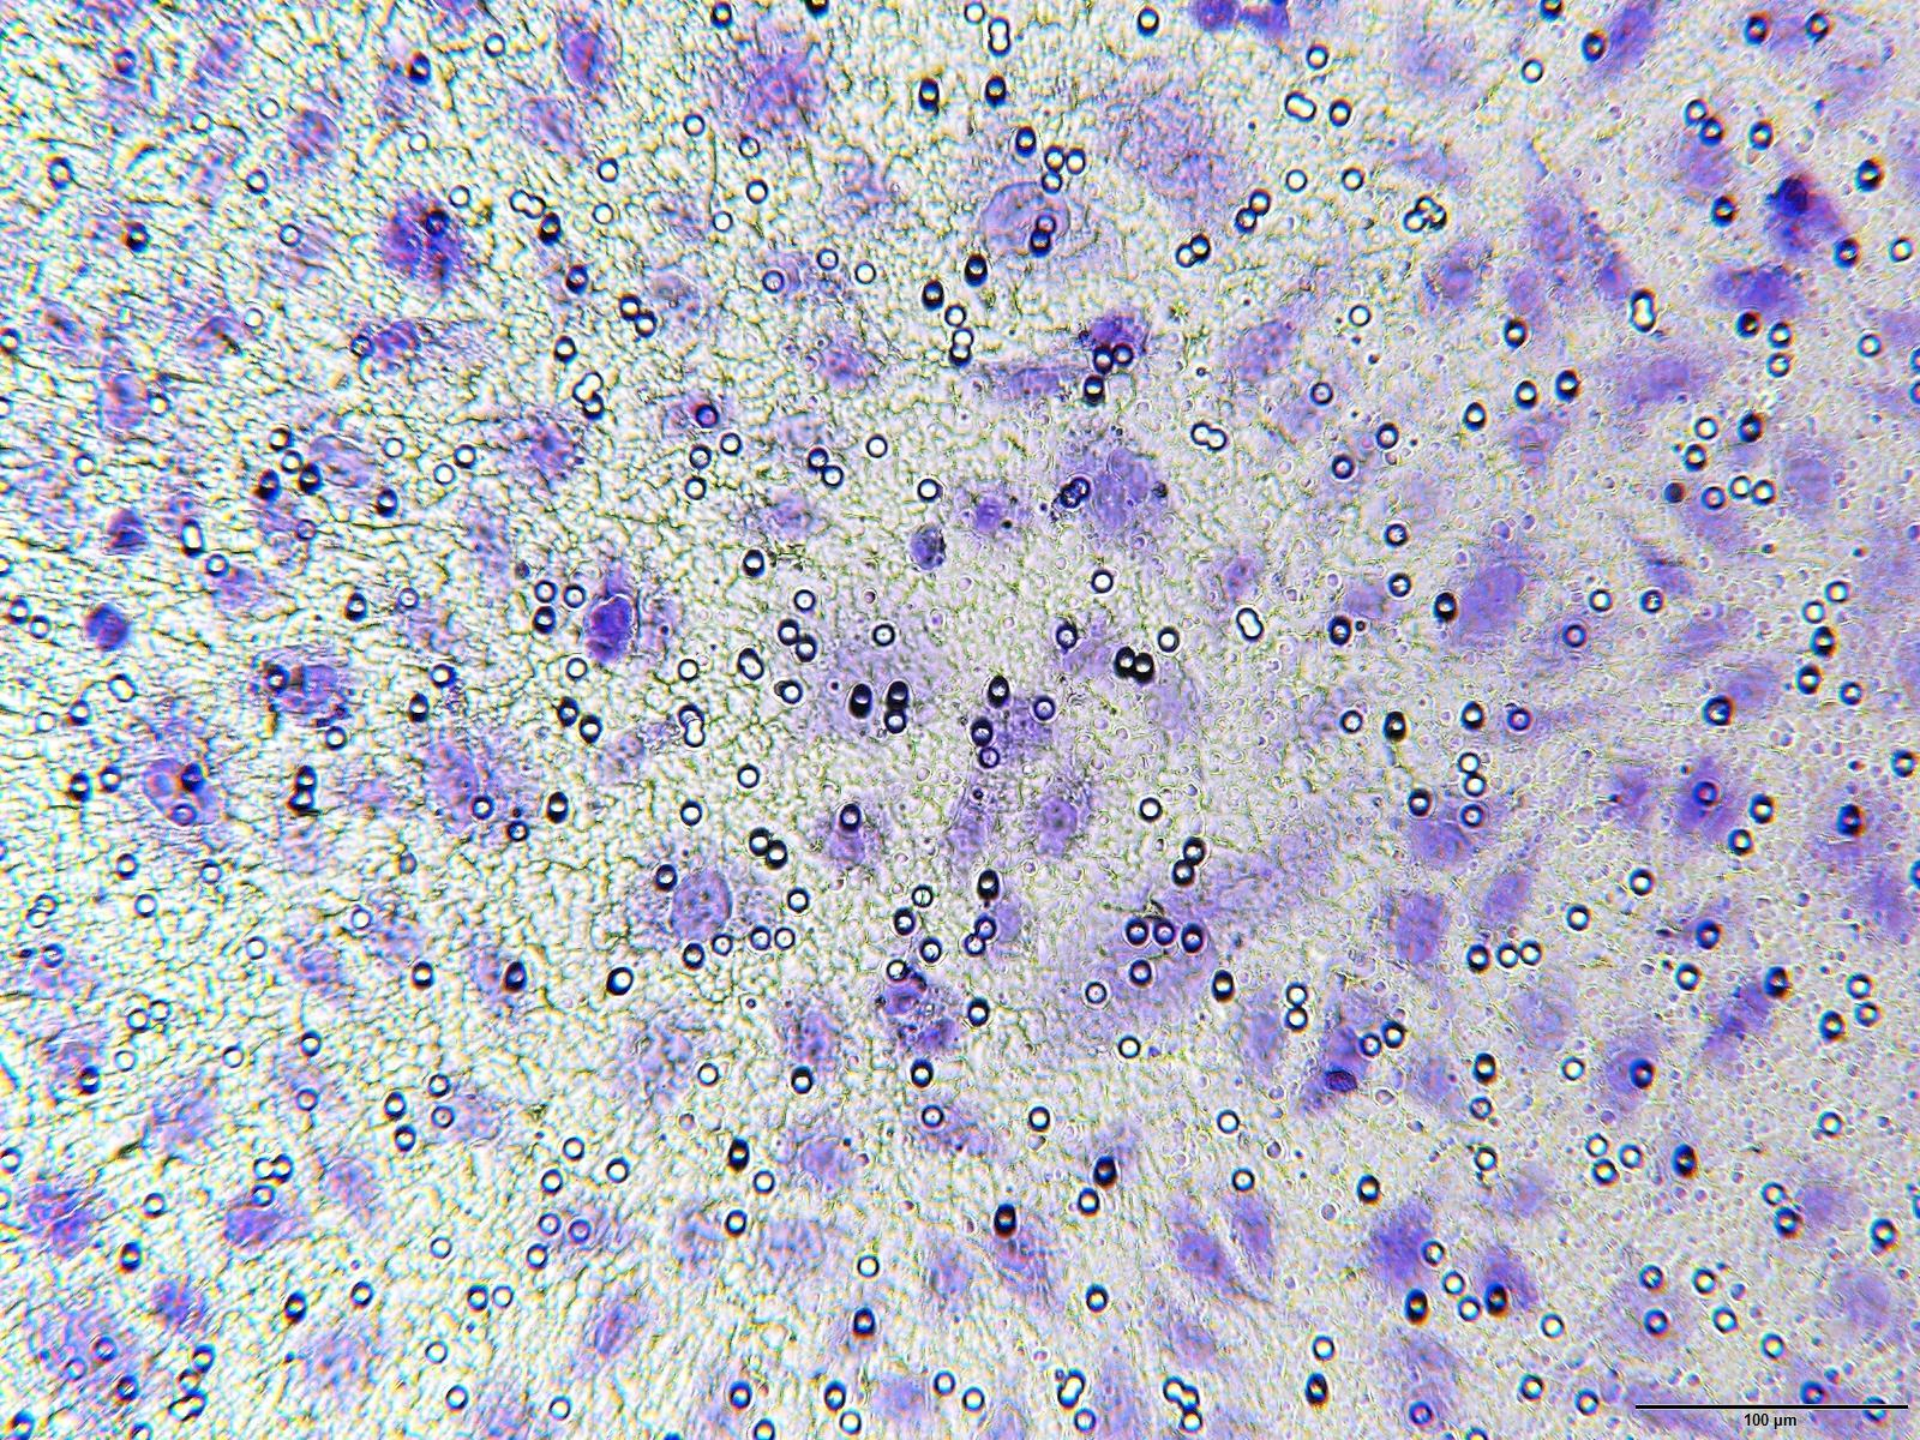

100 μm



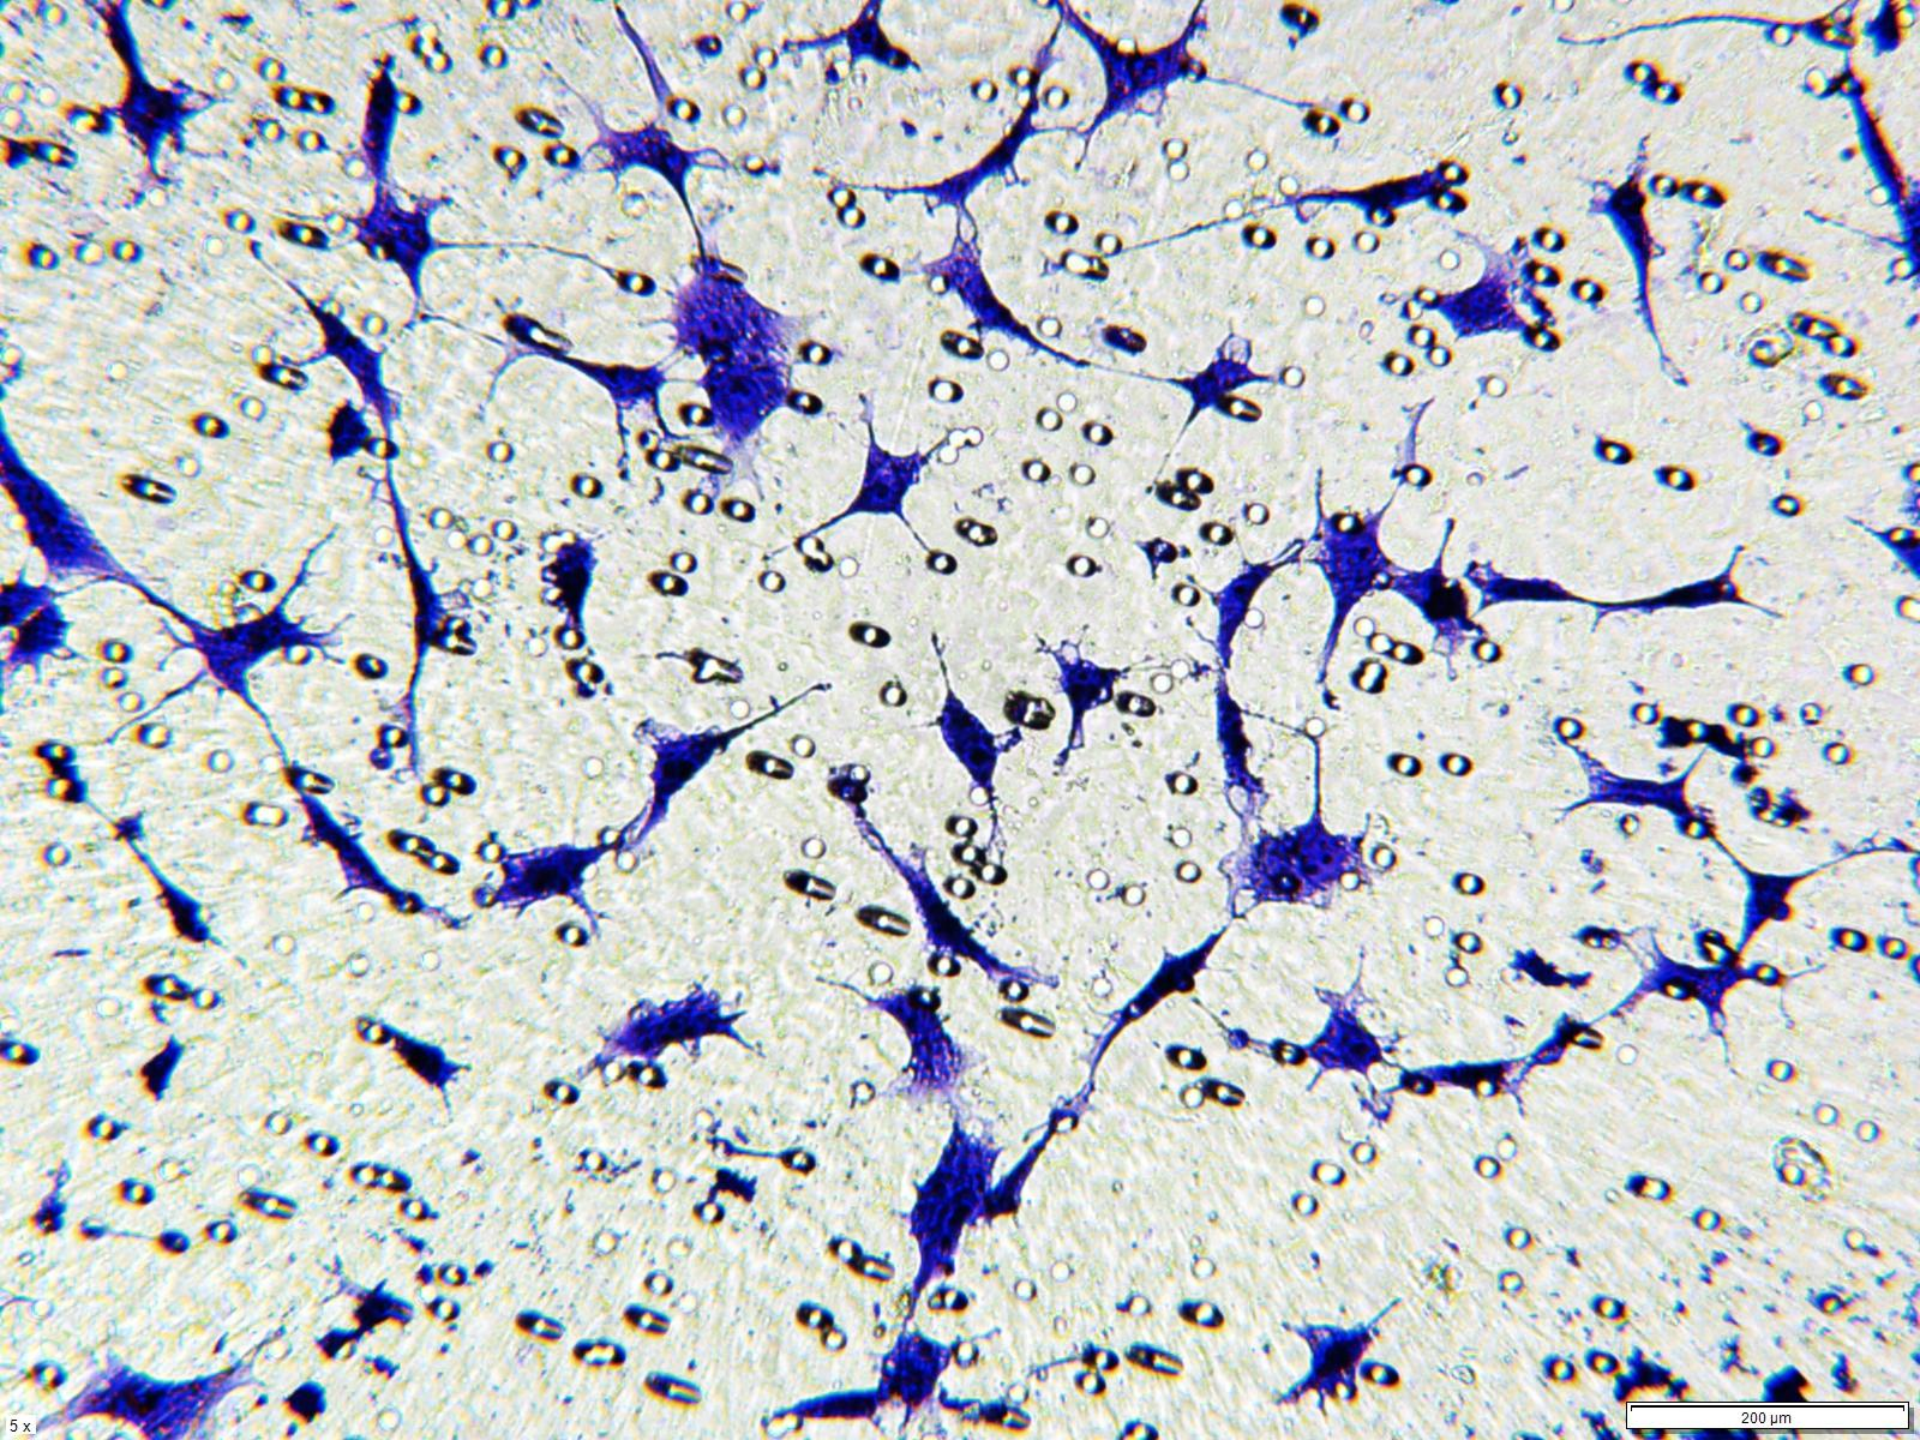

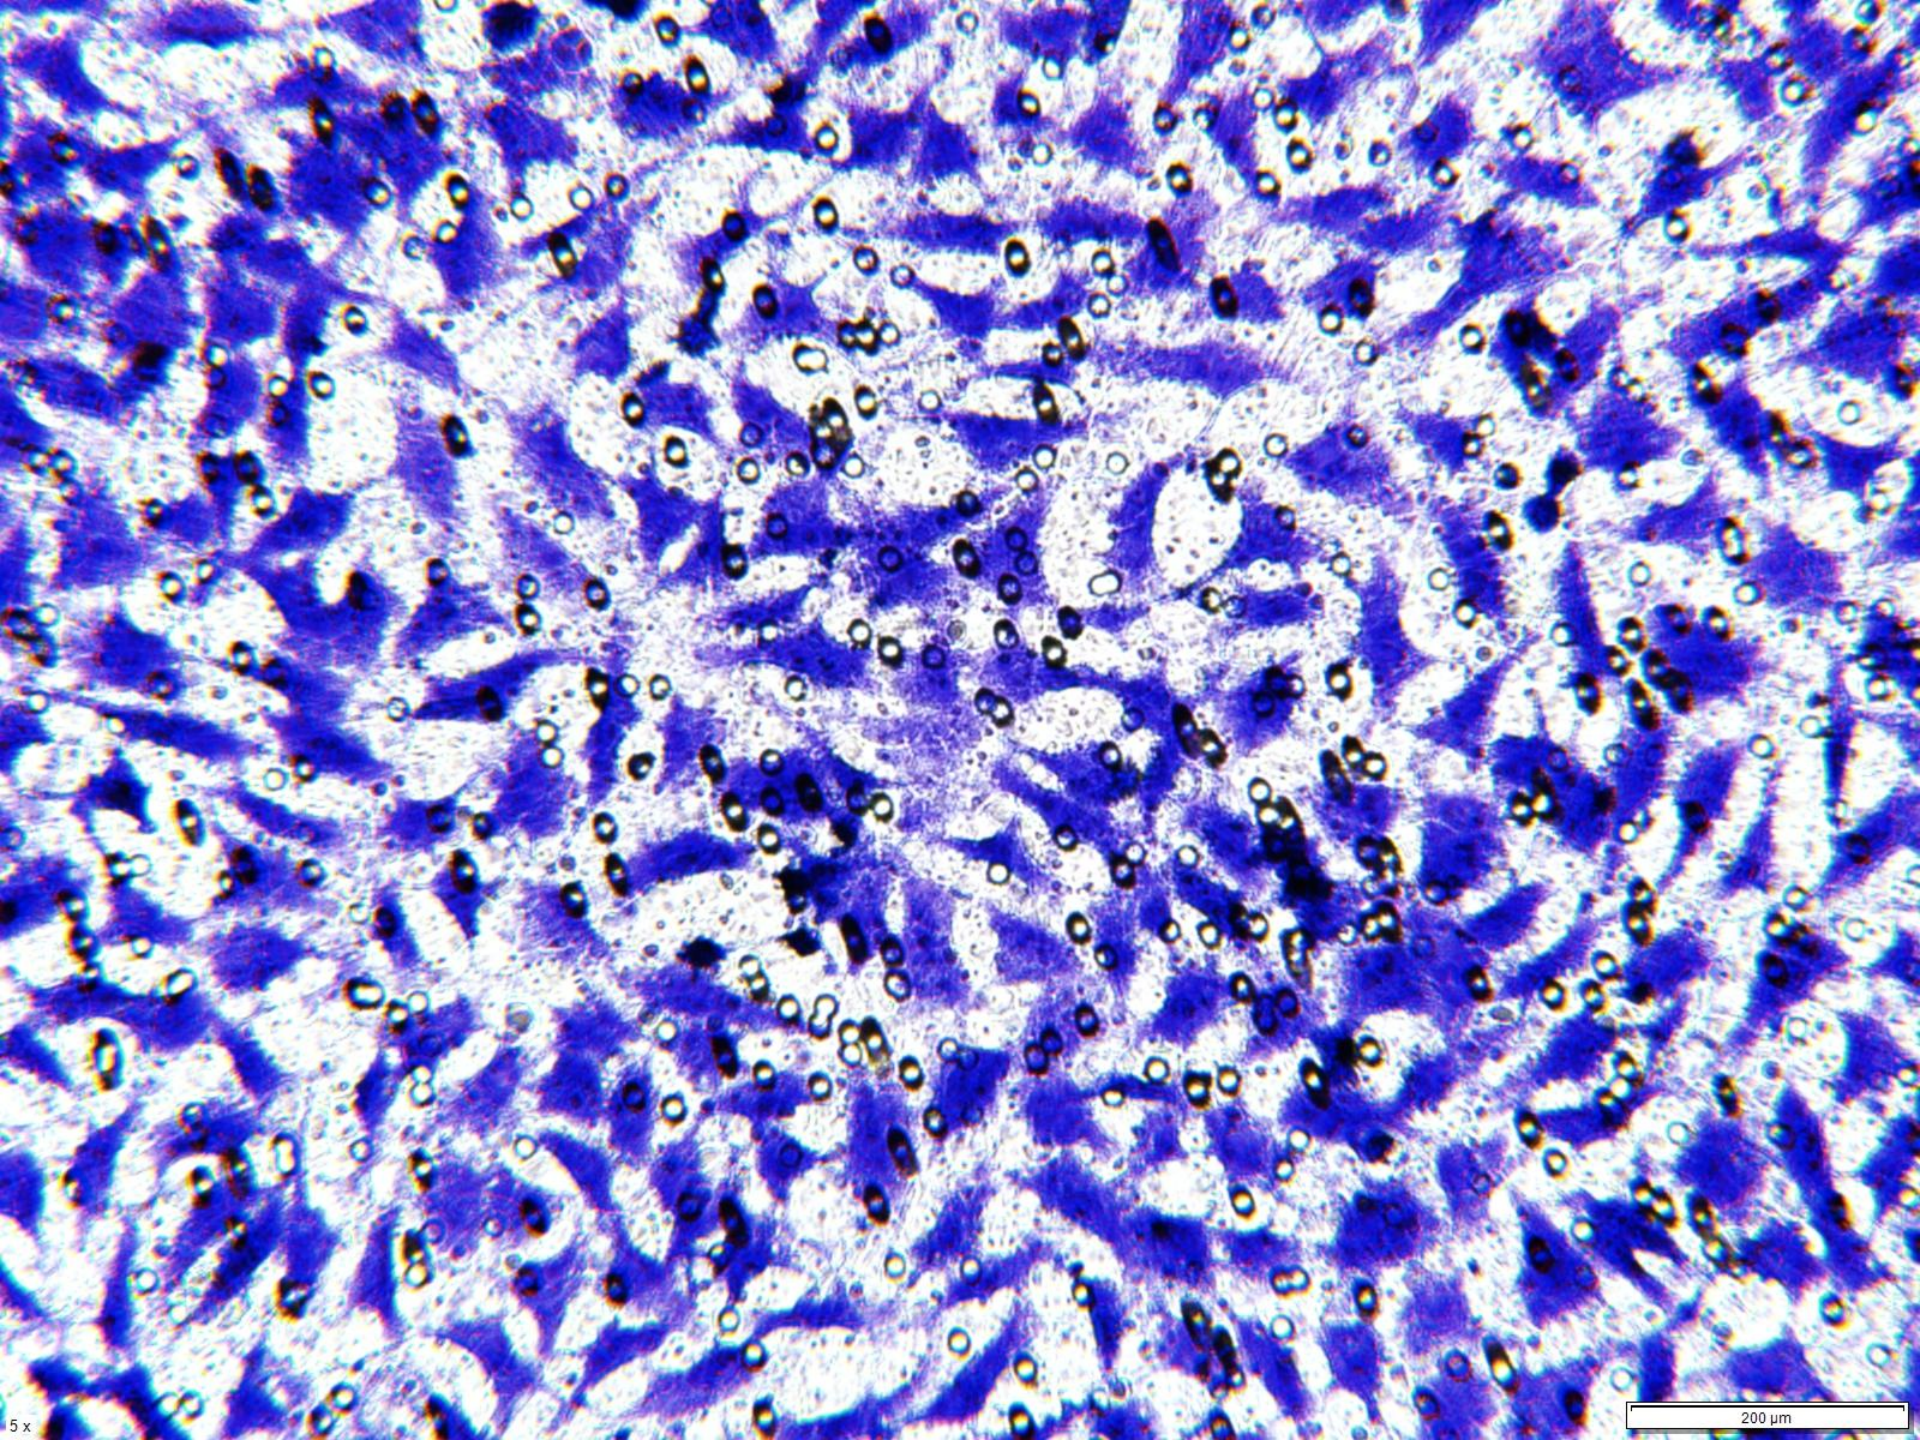

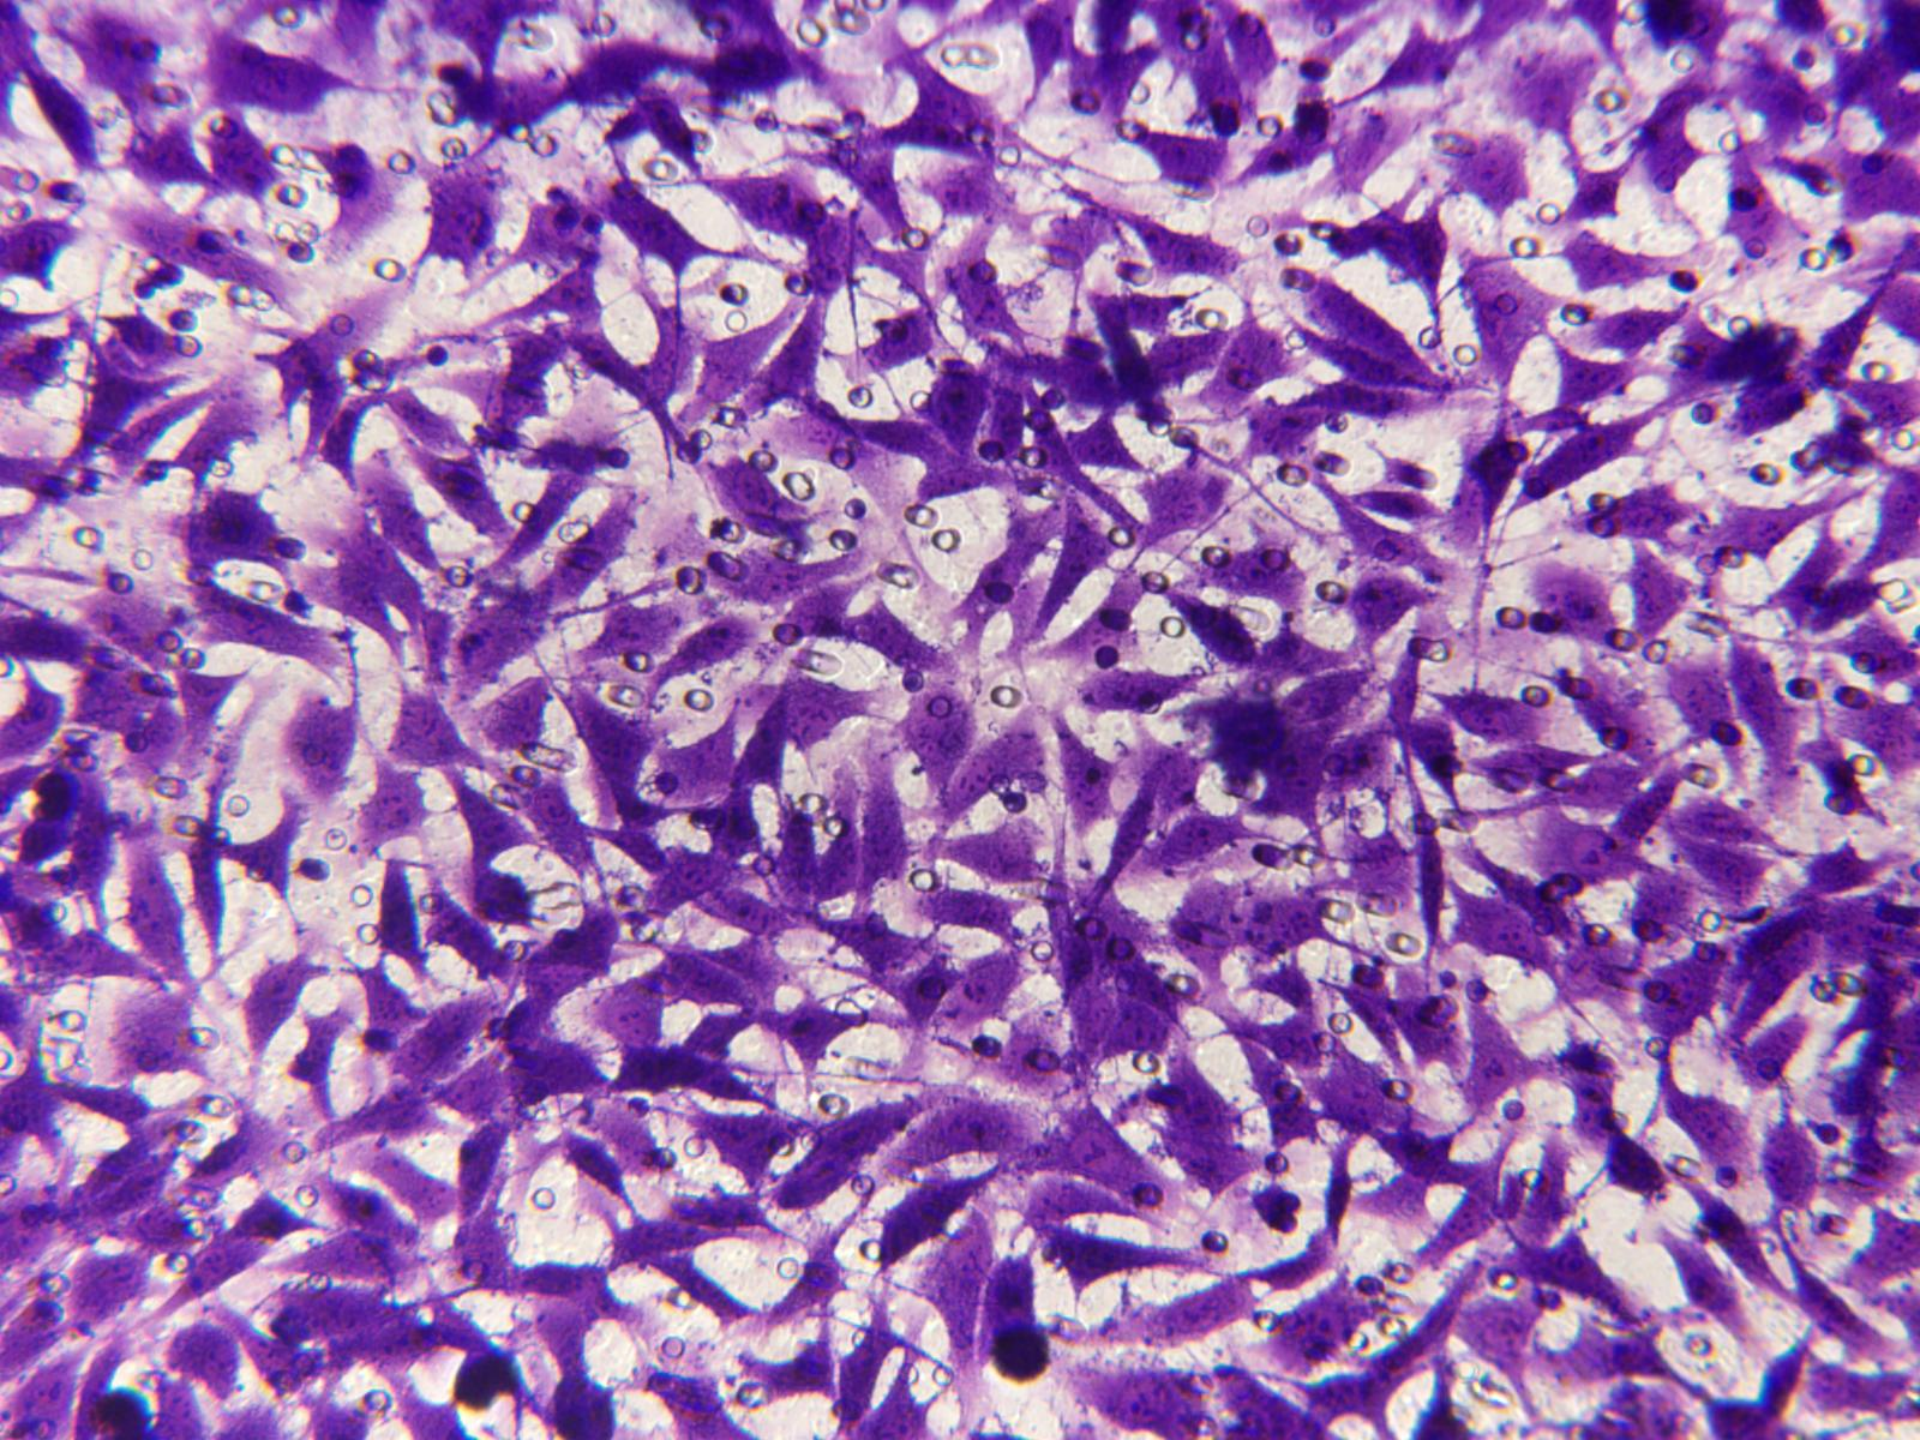

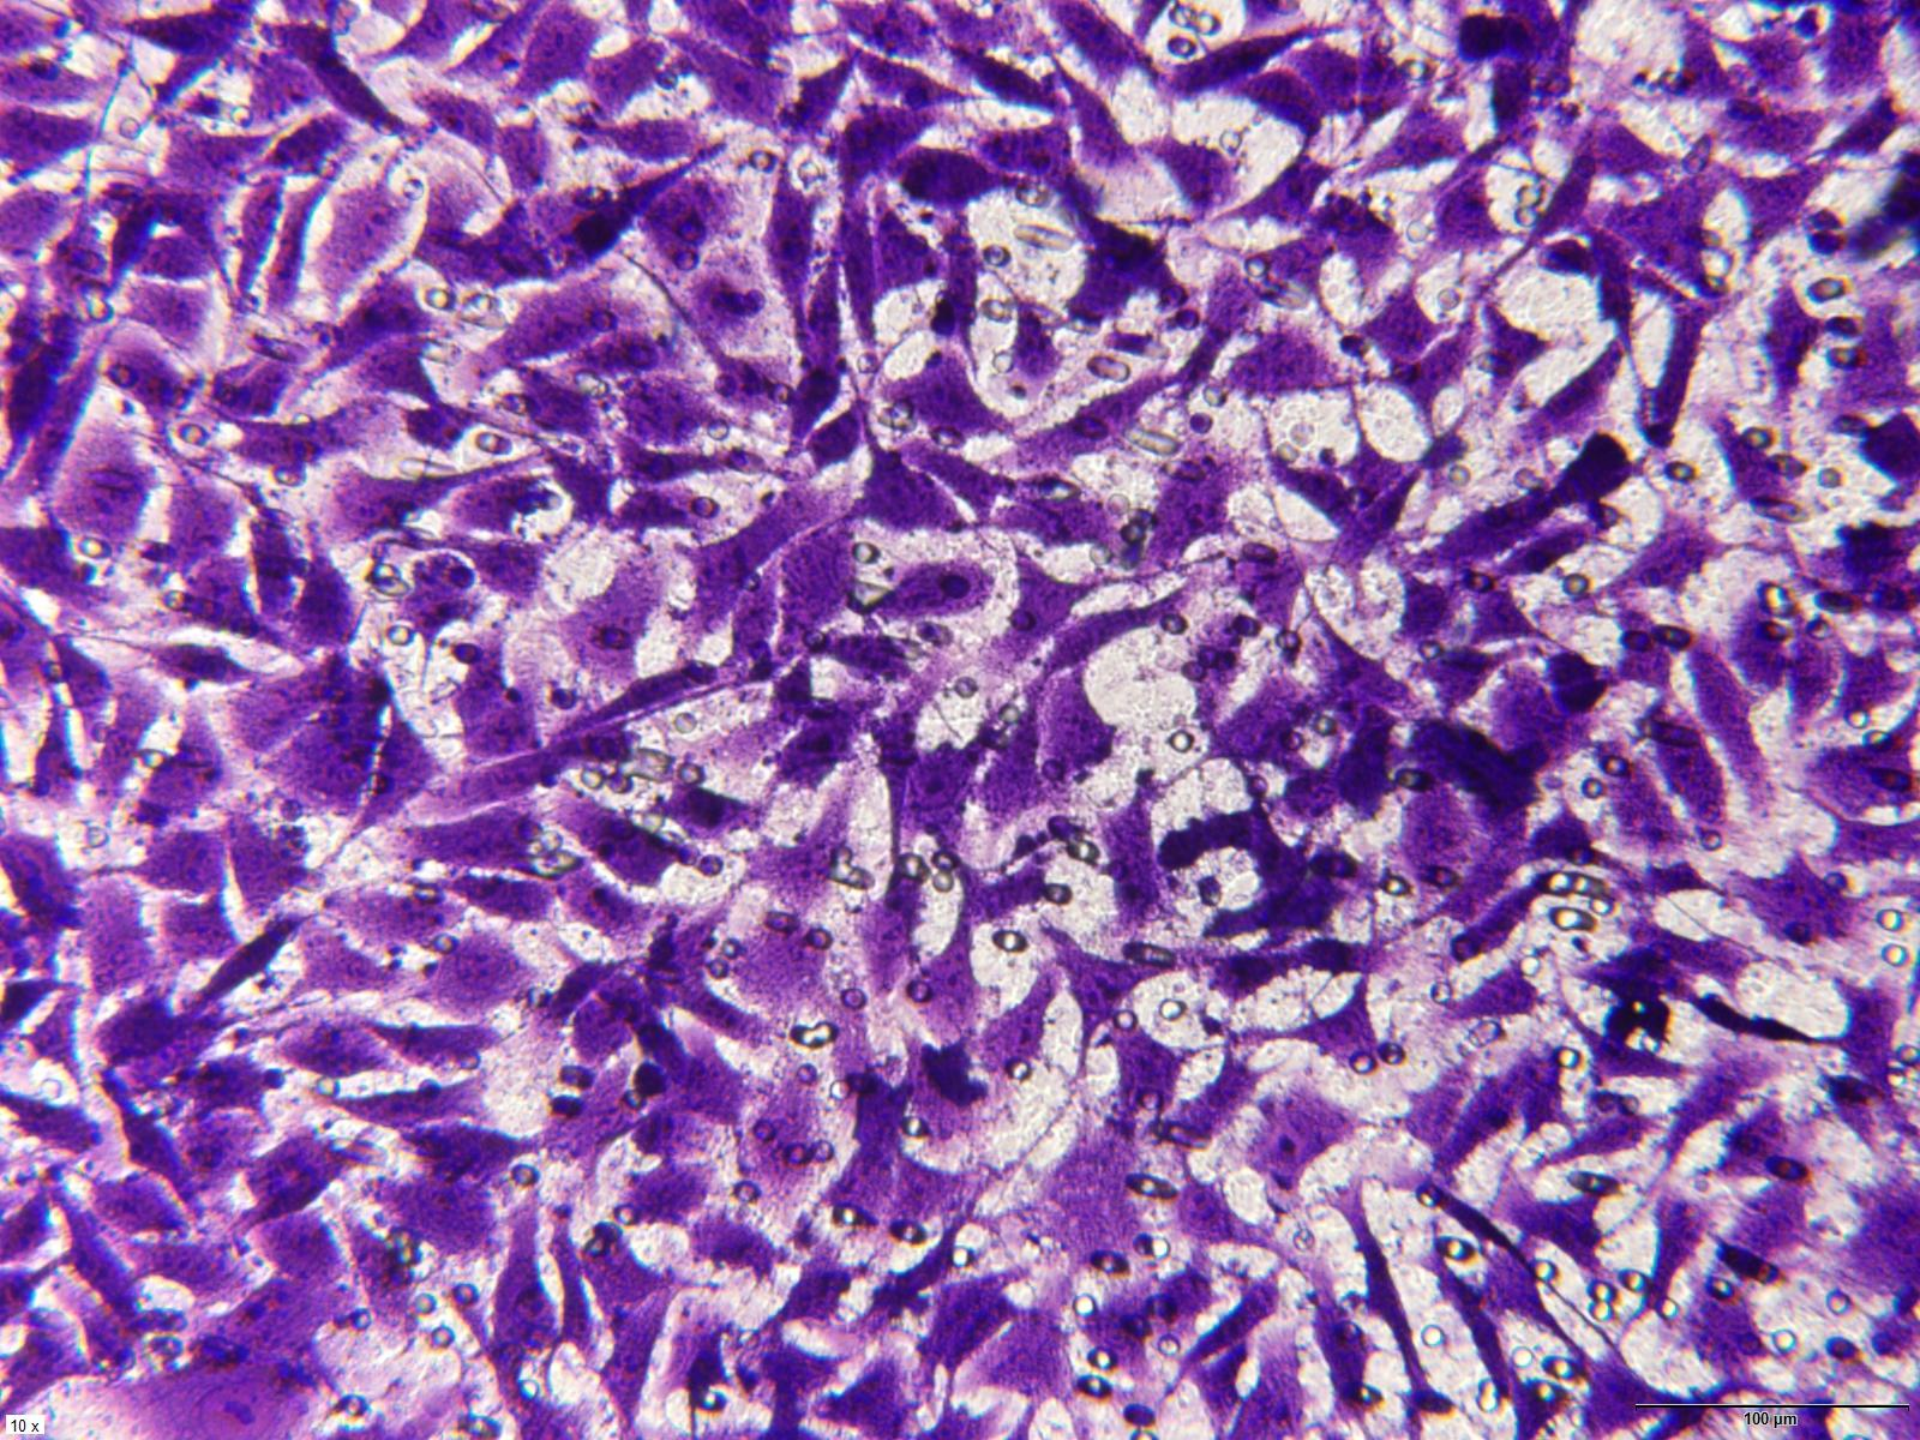

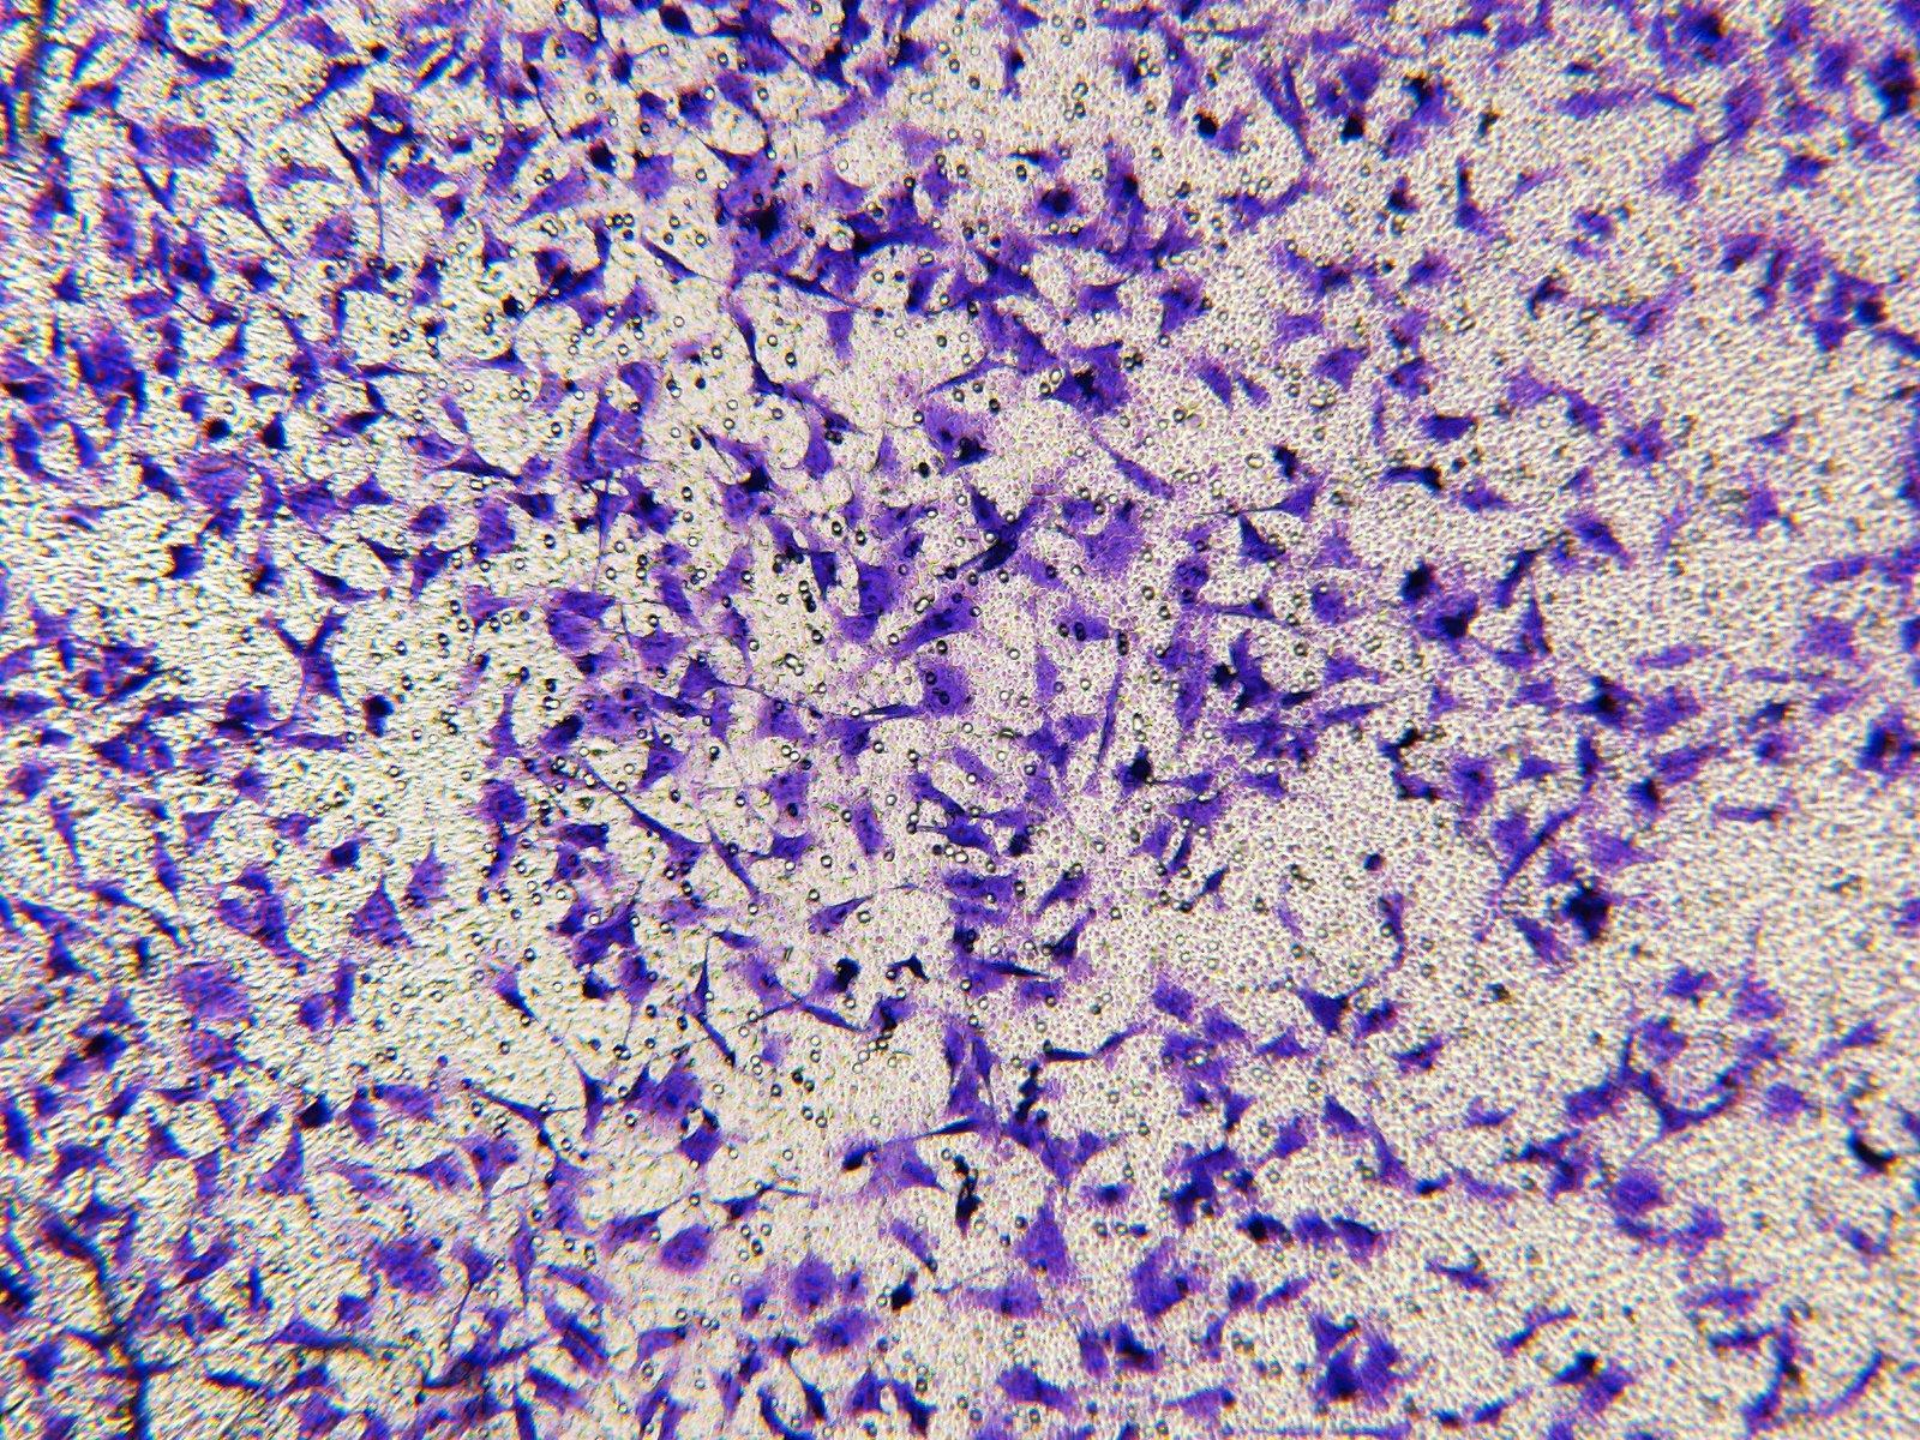

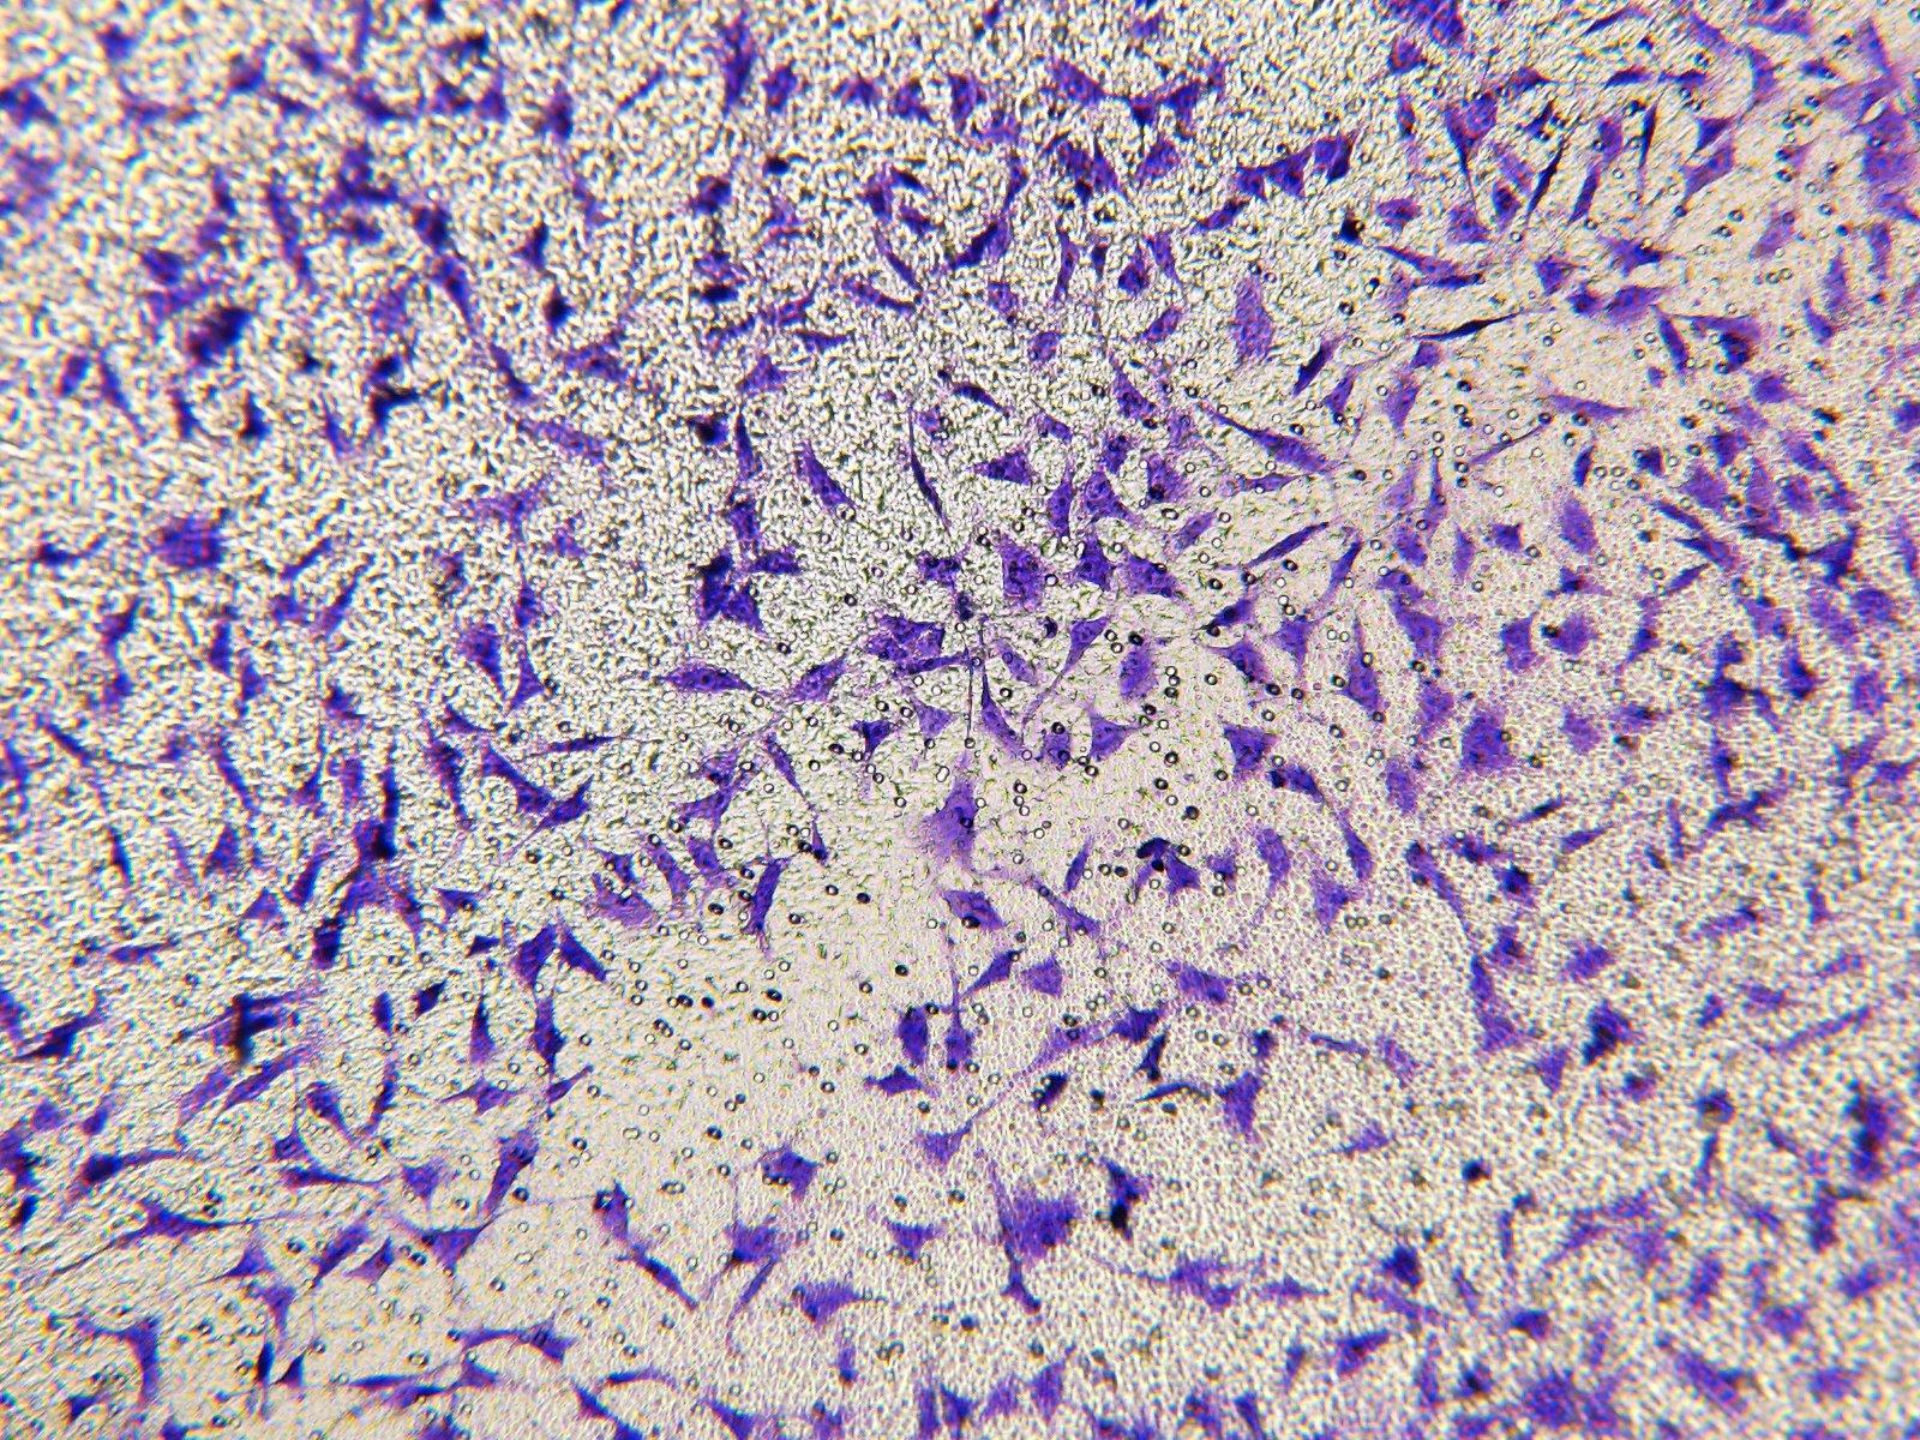

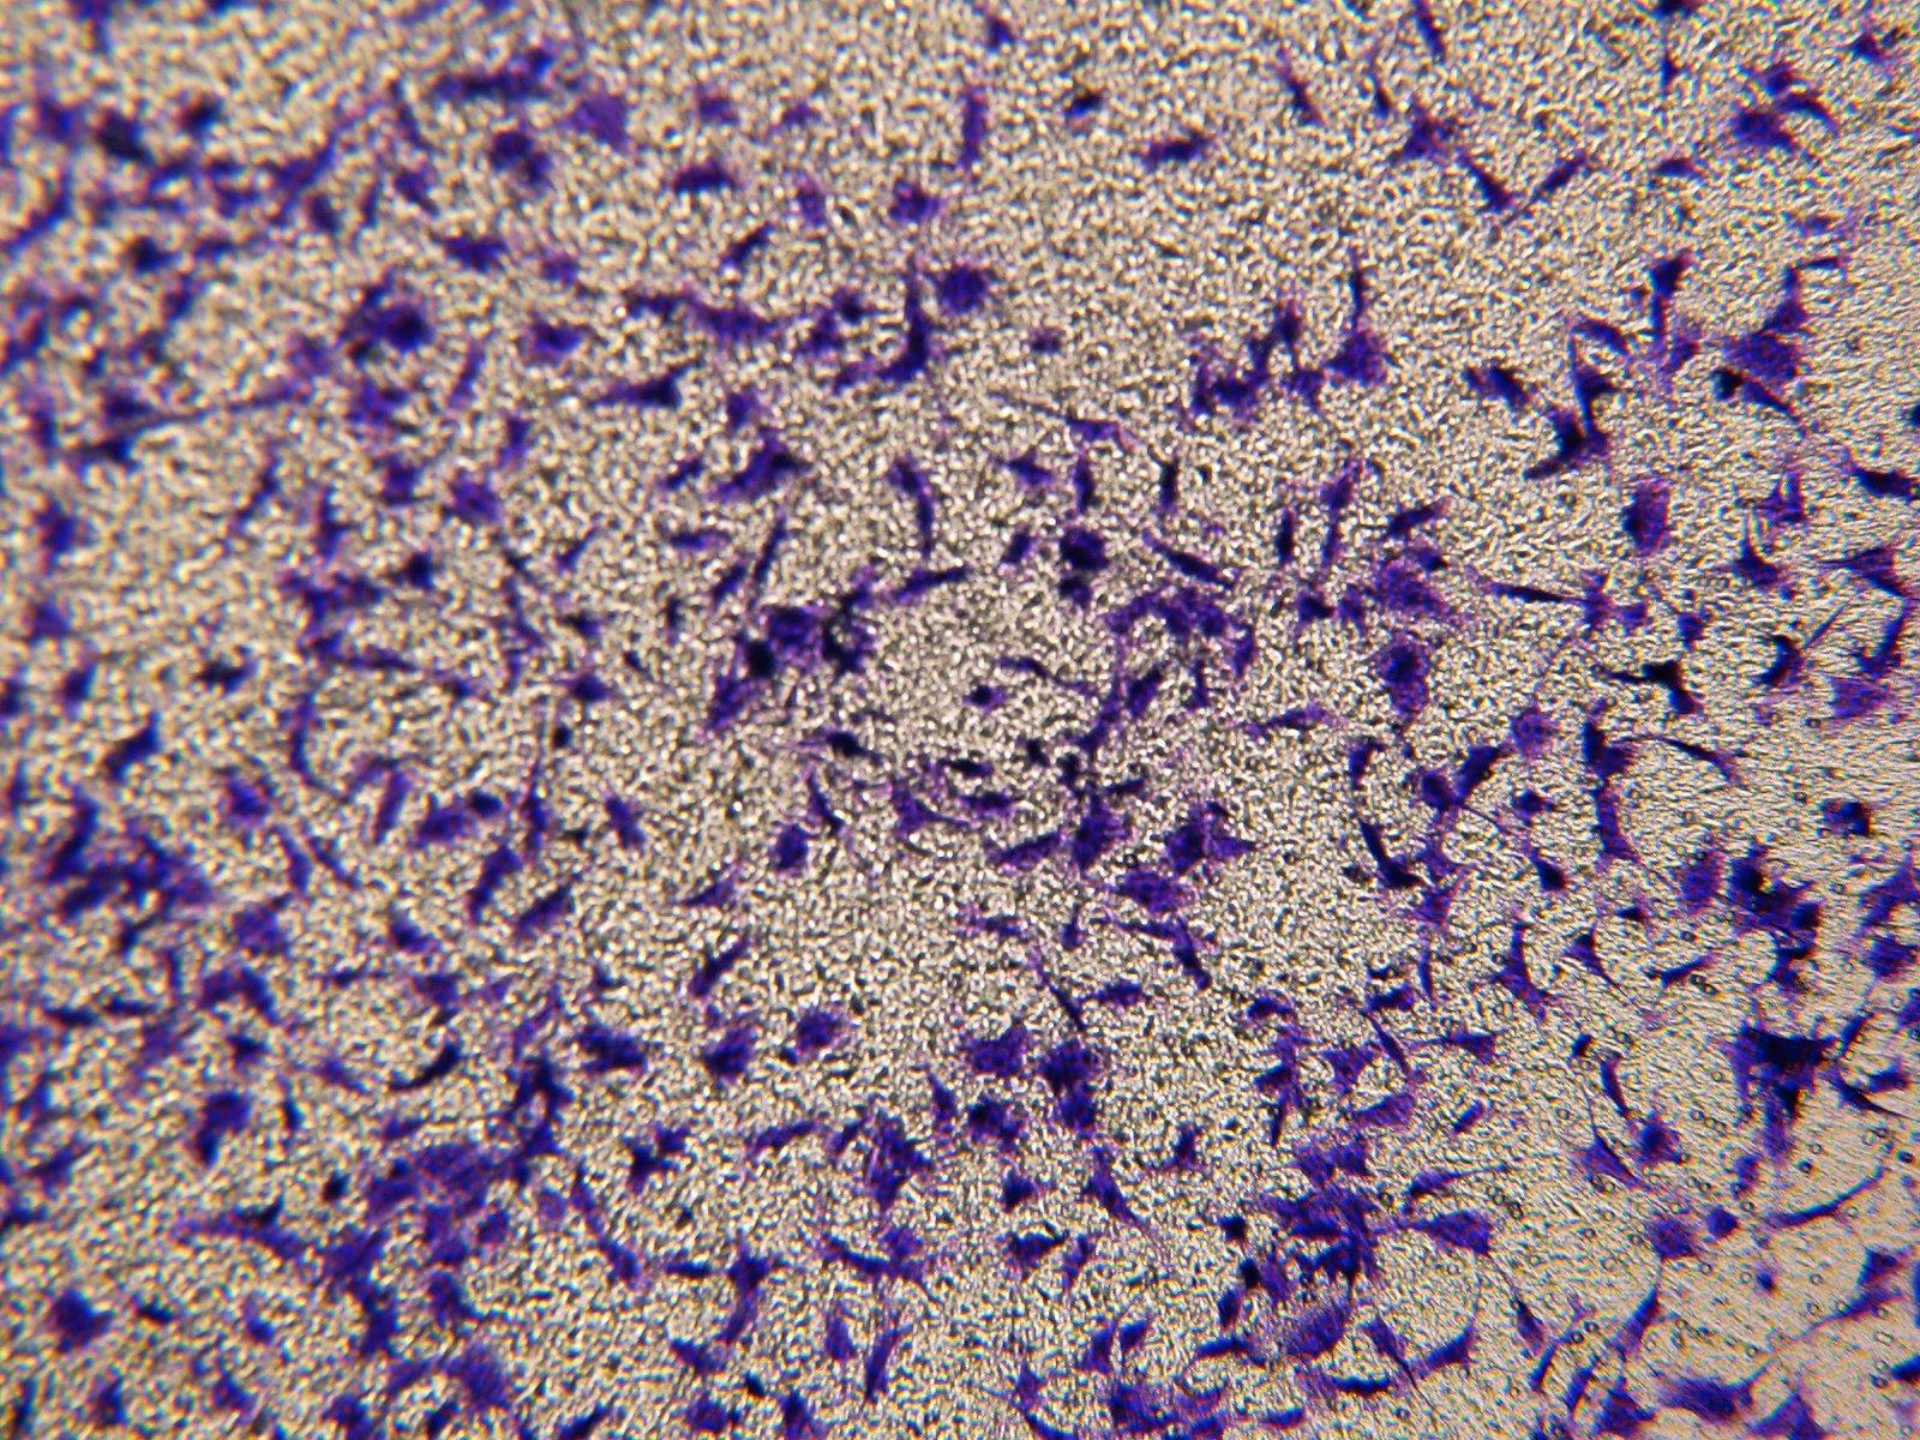

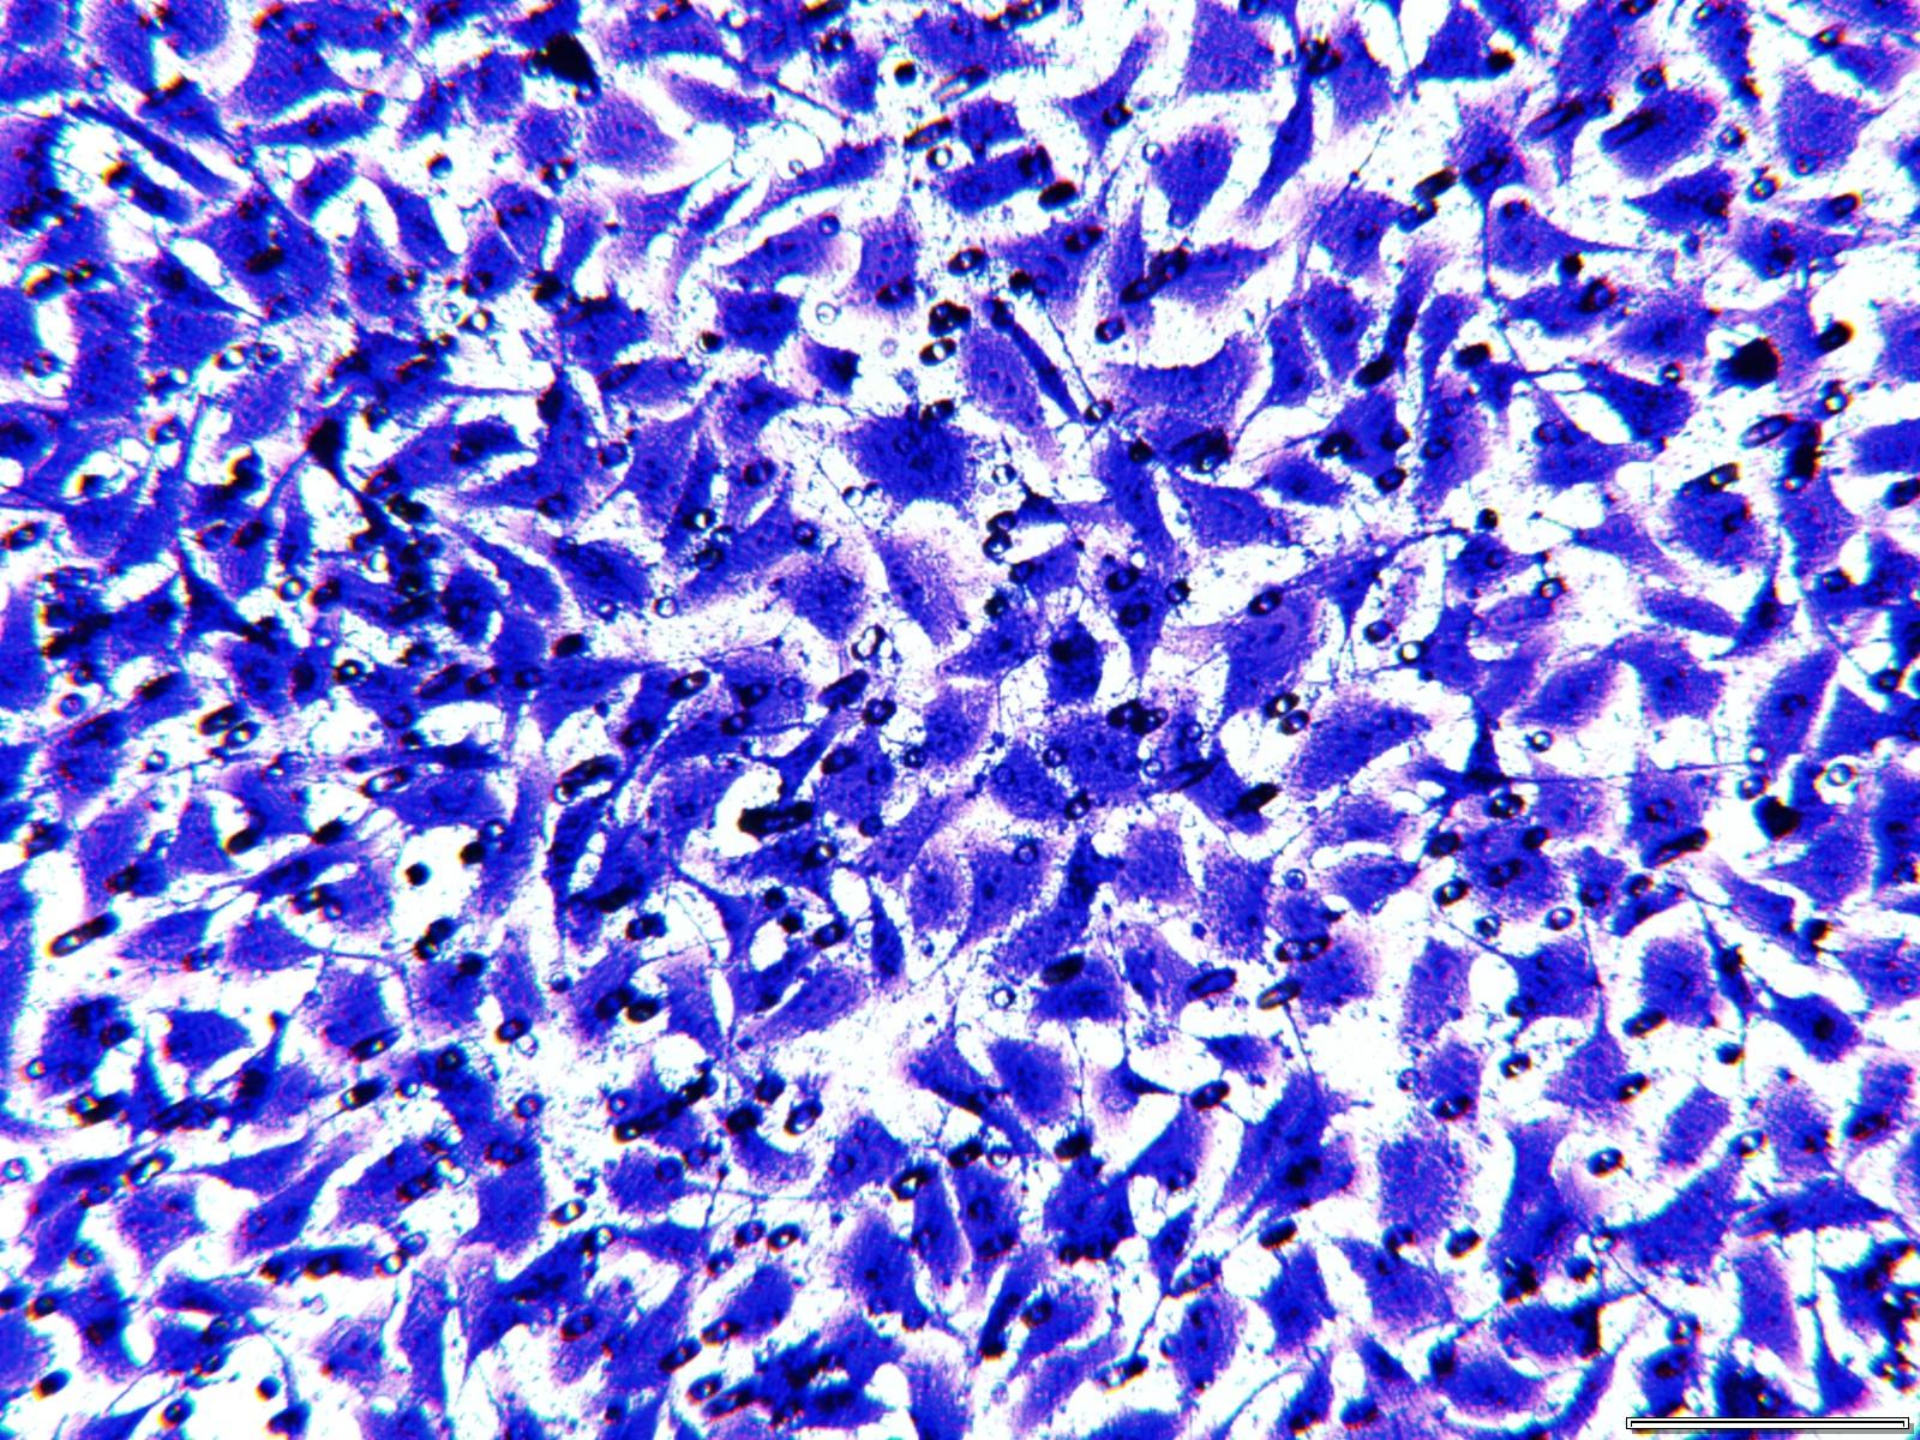



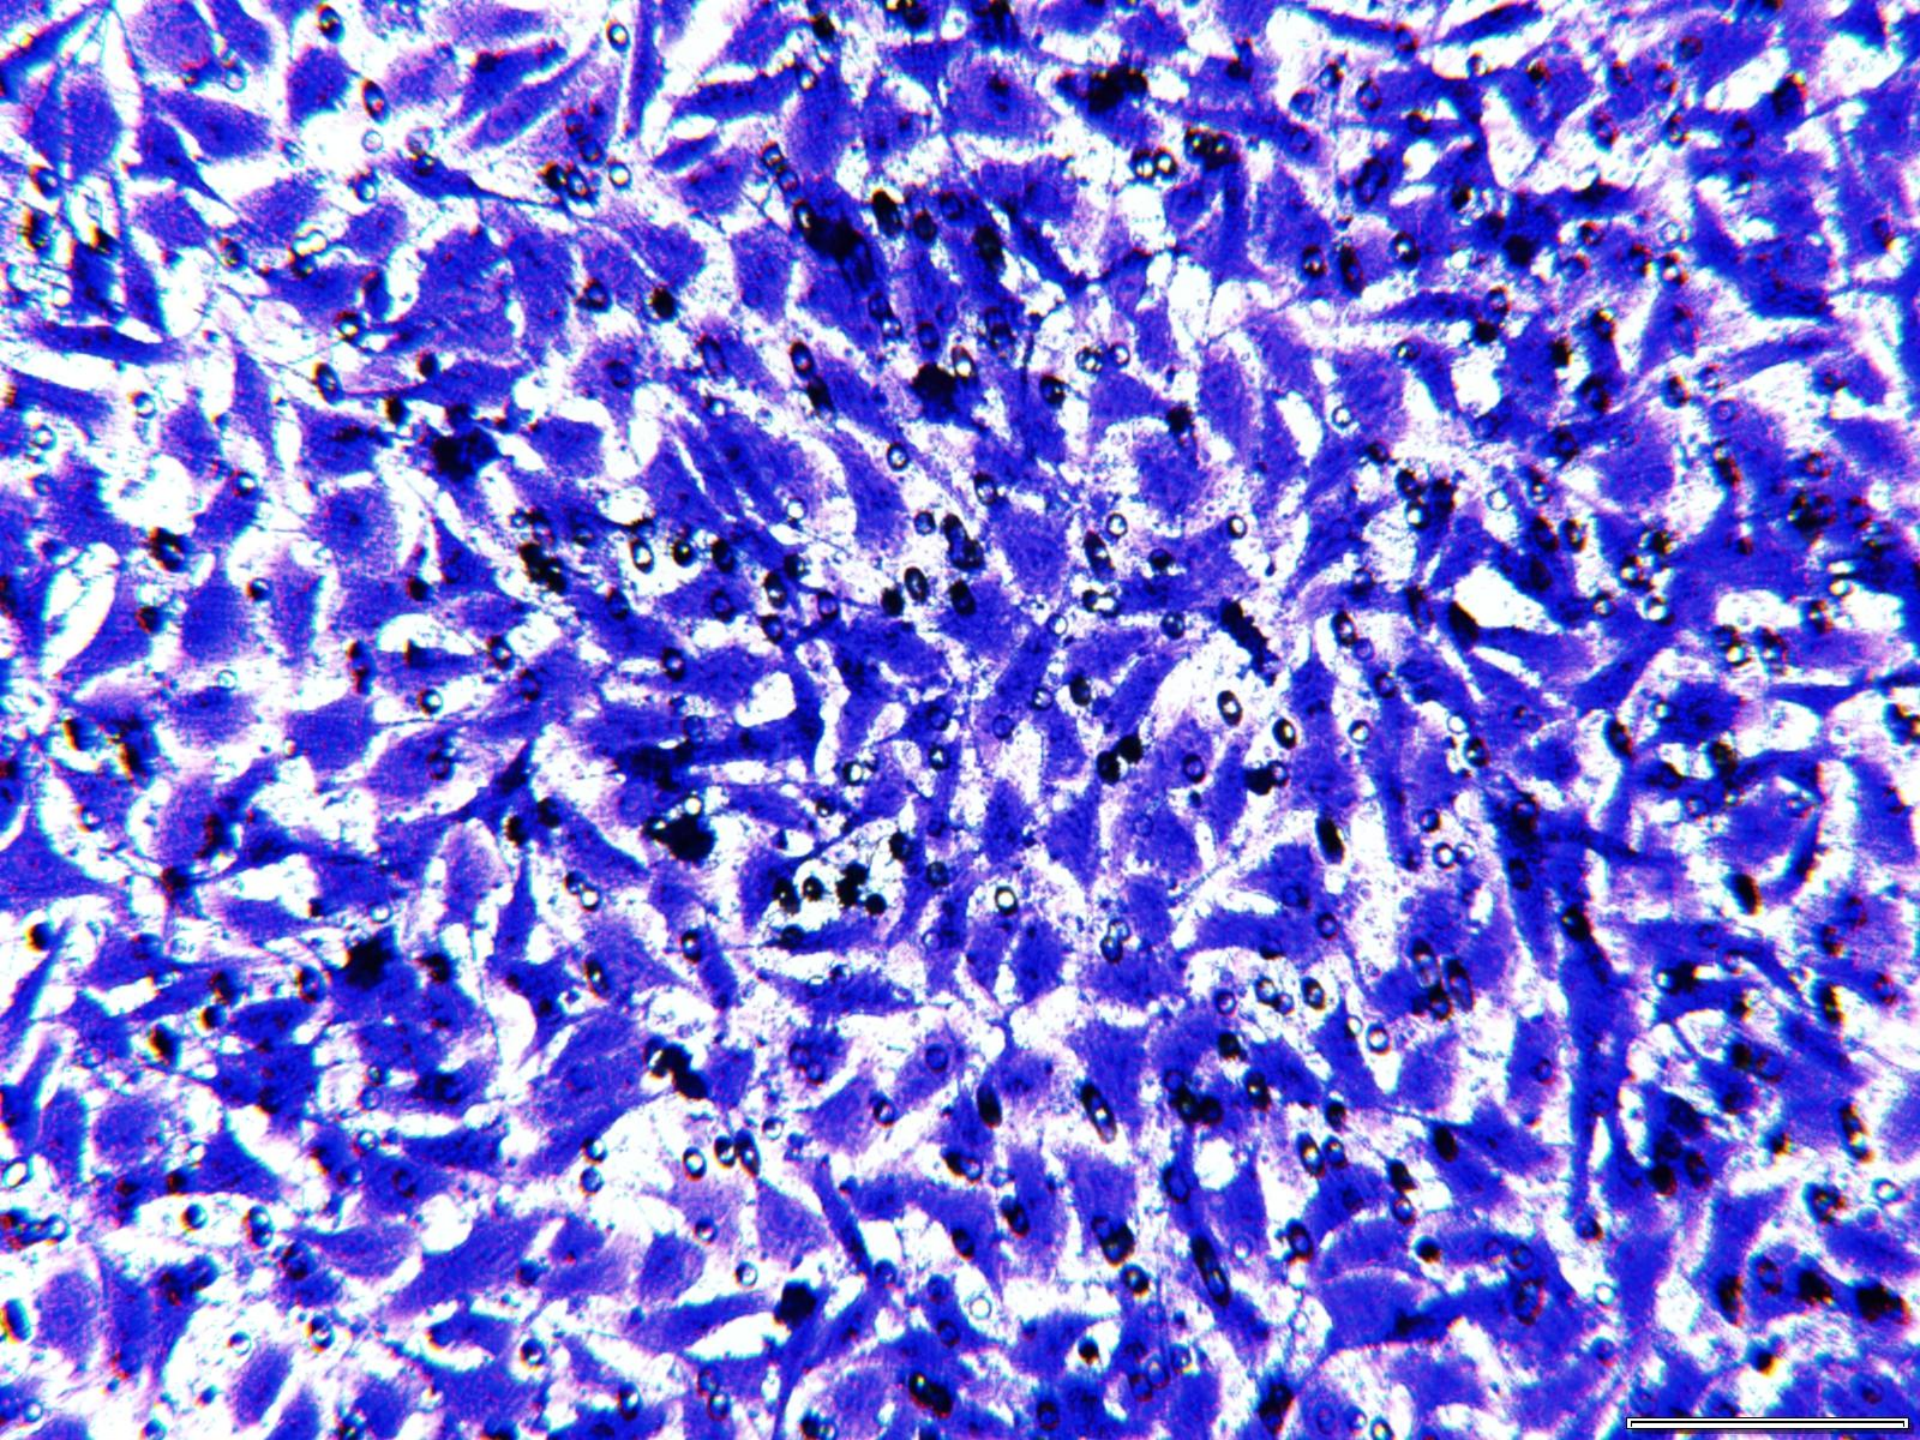

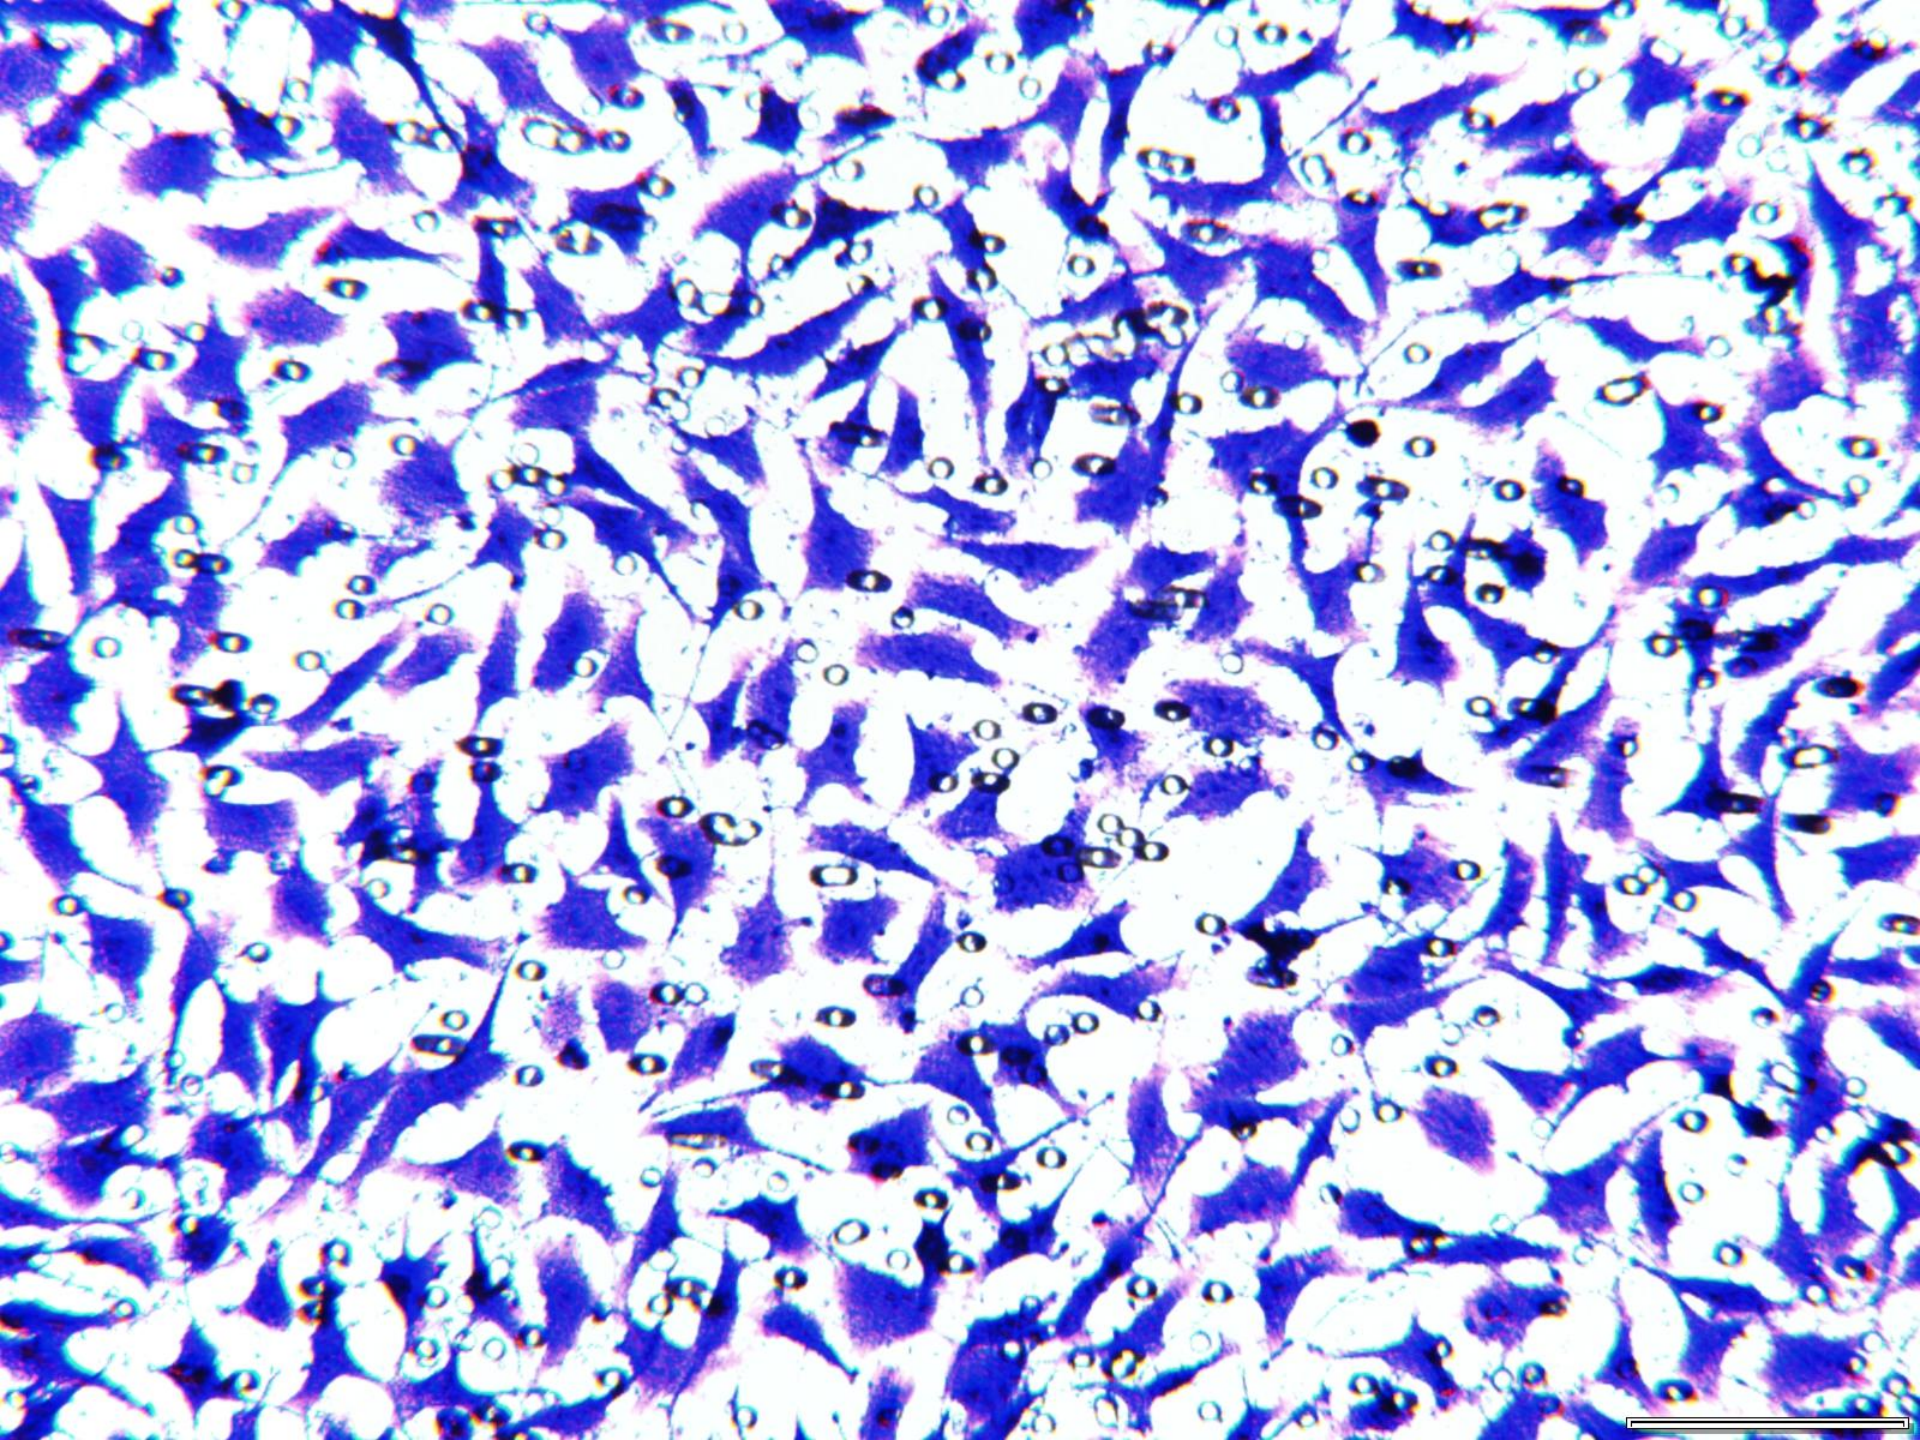

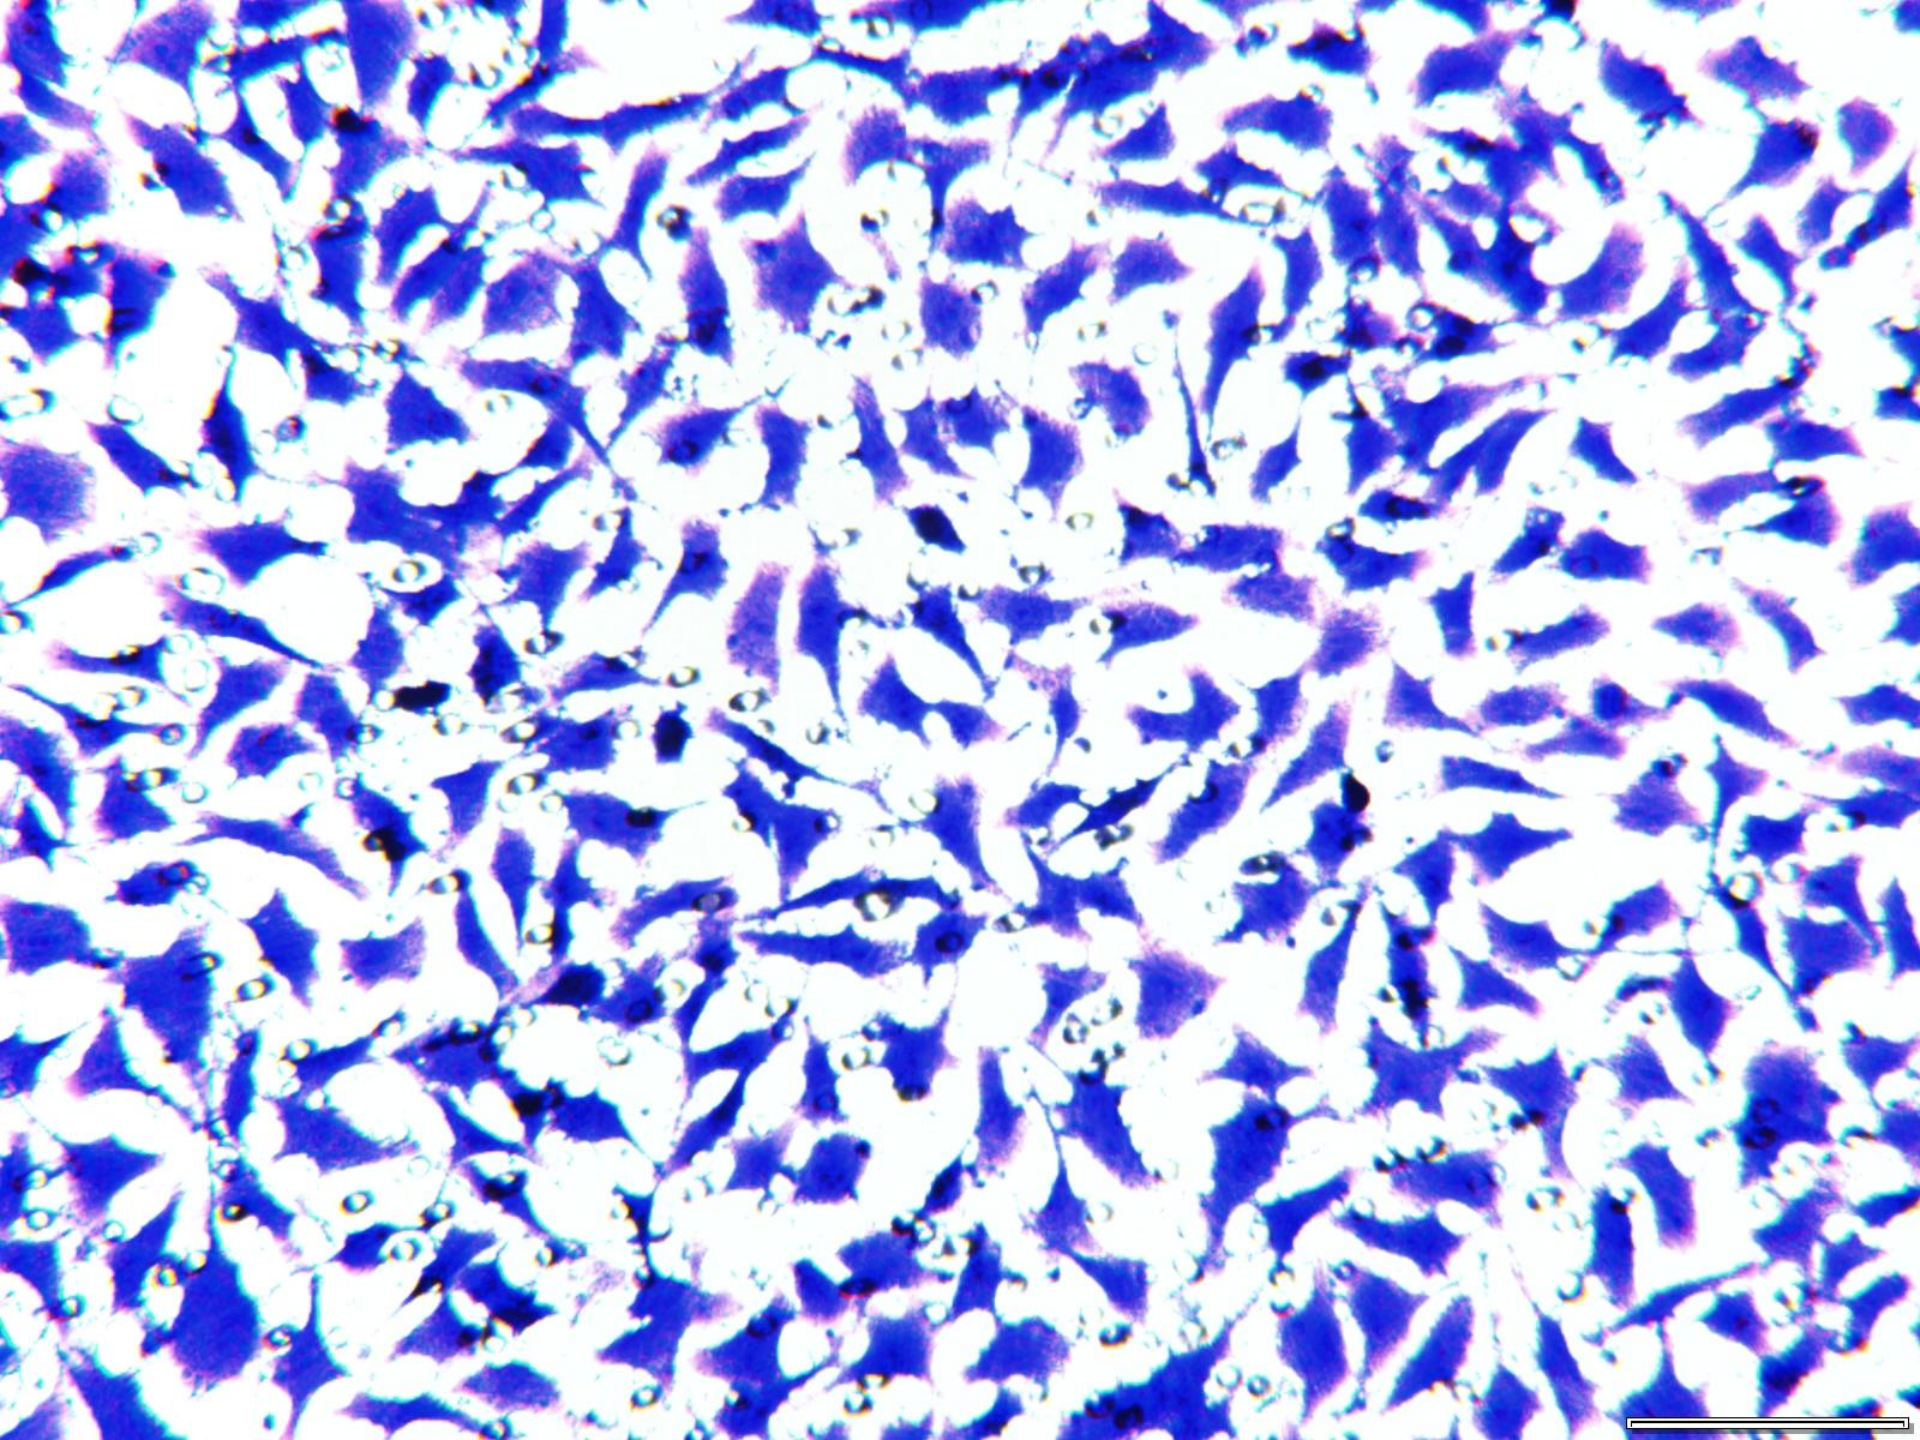

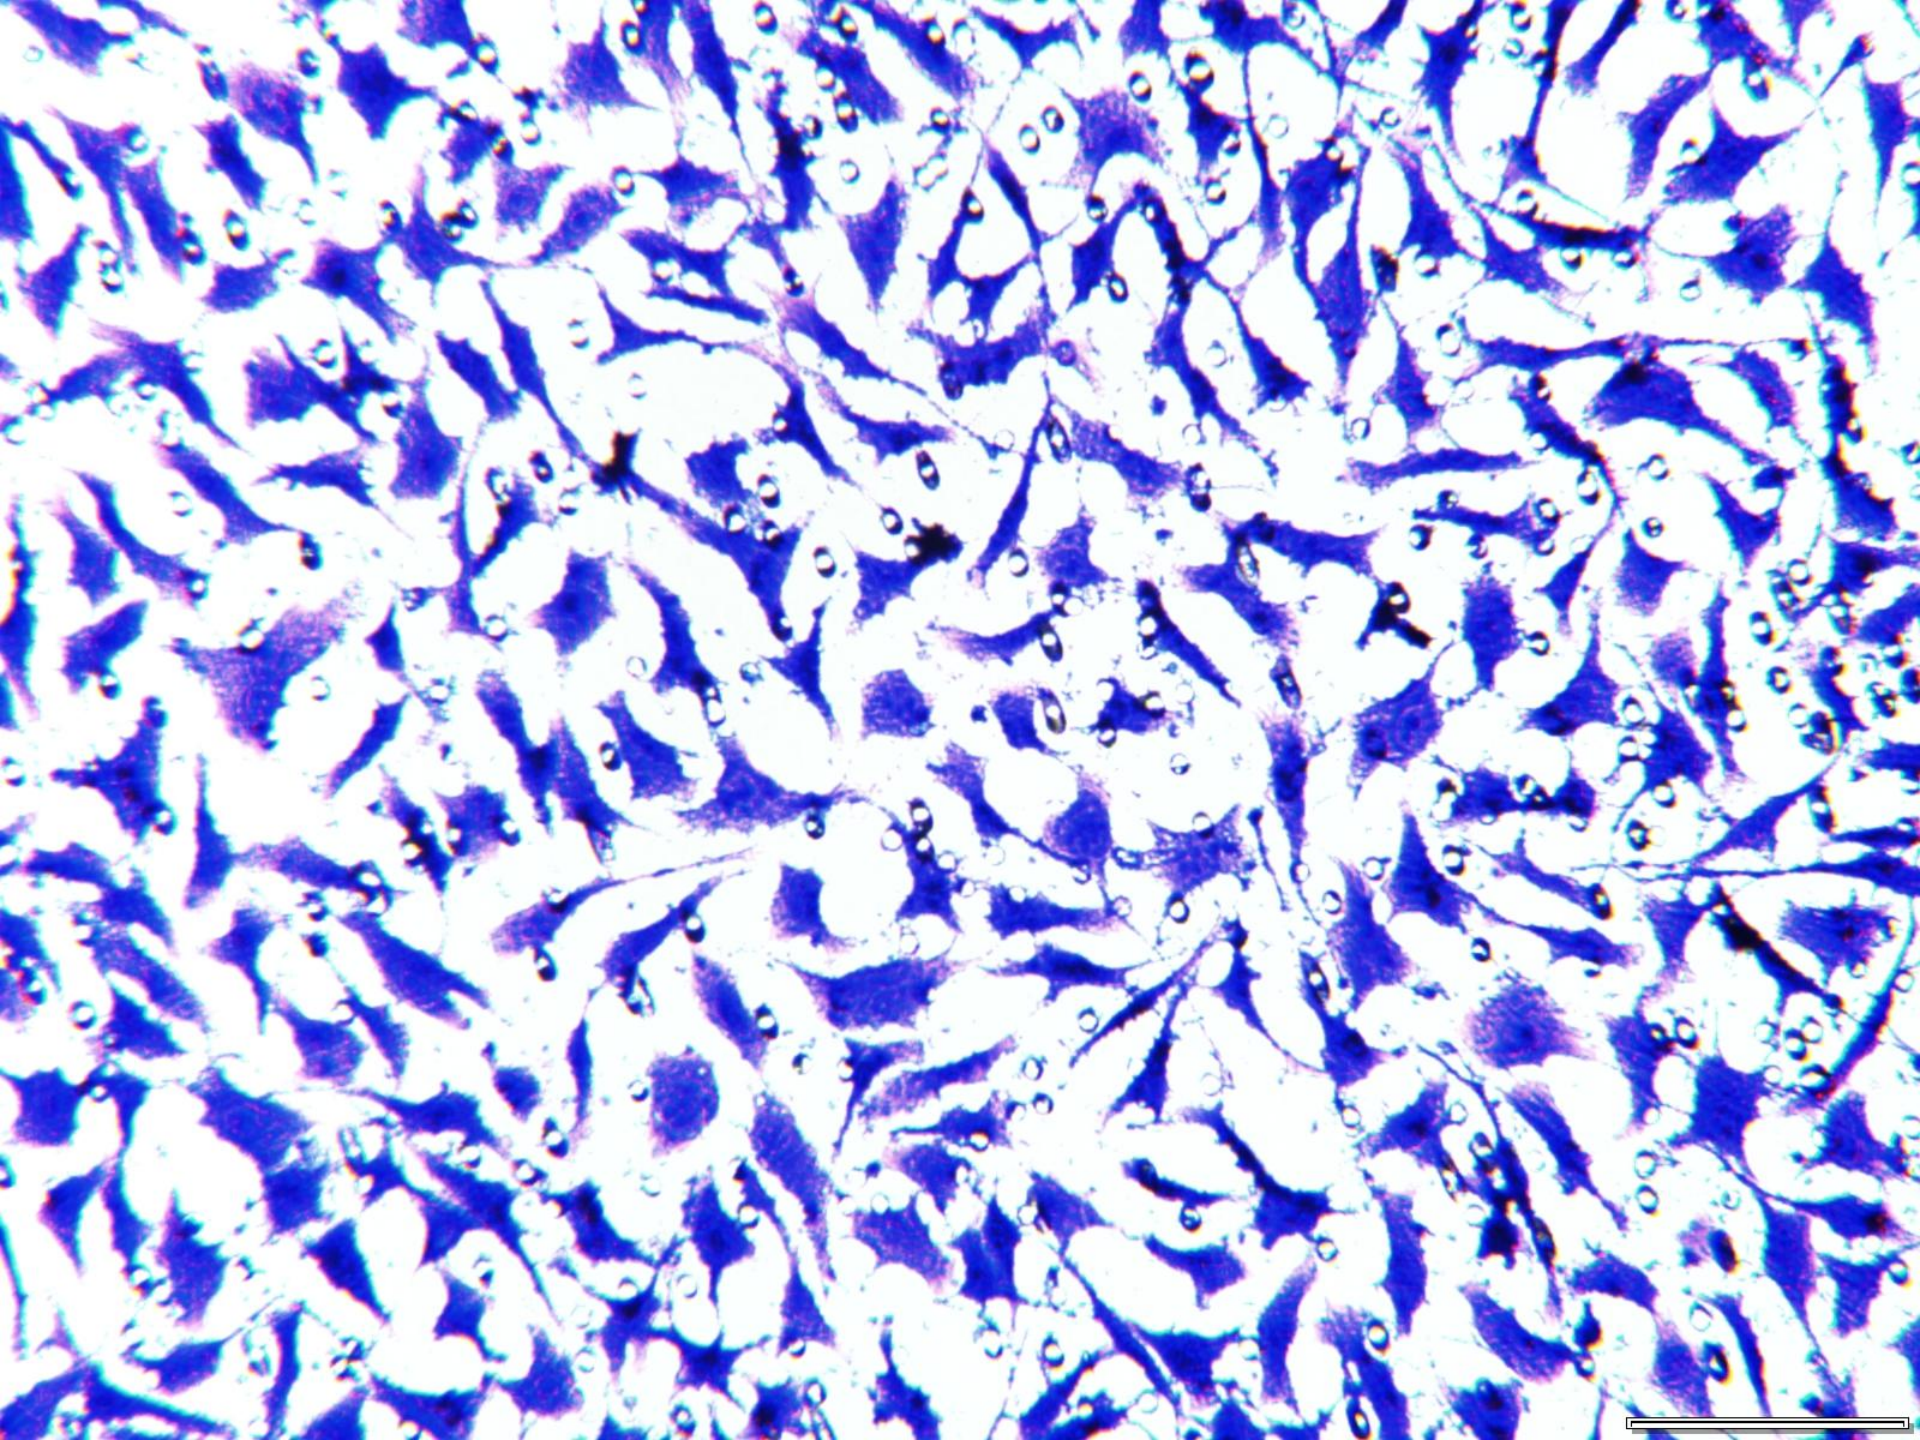

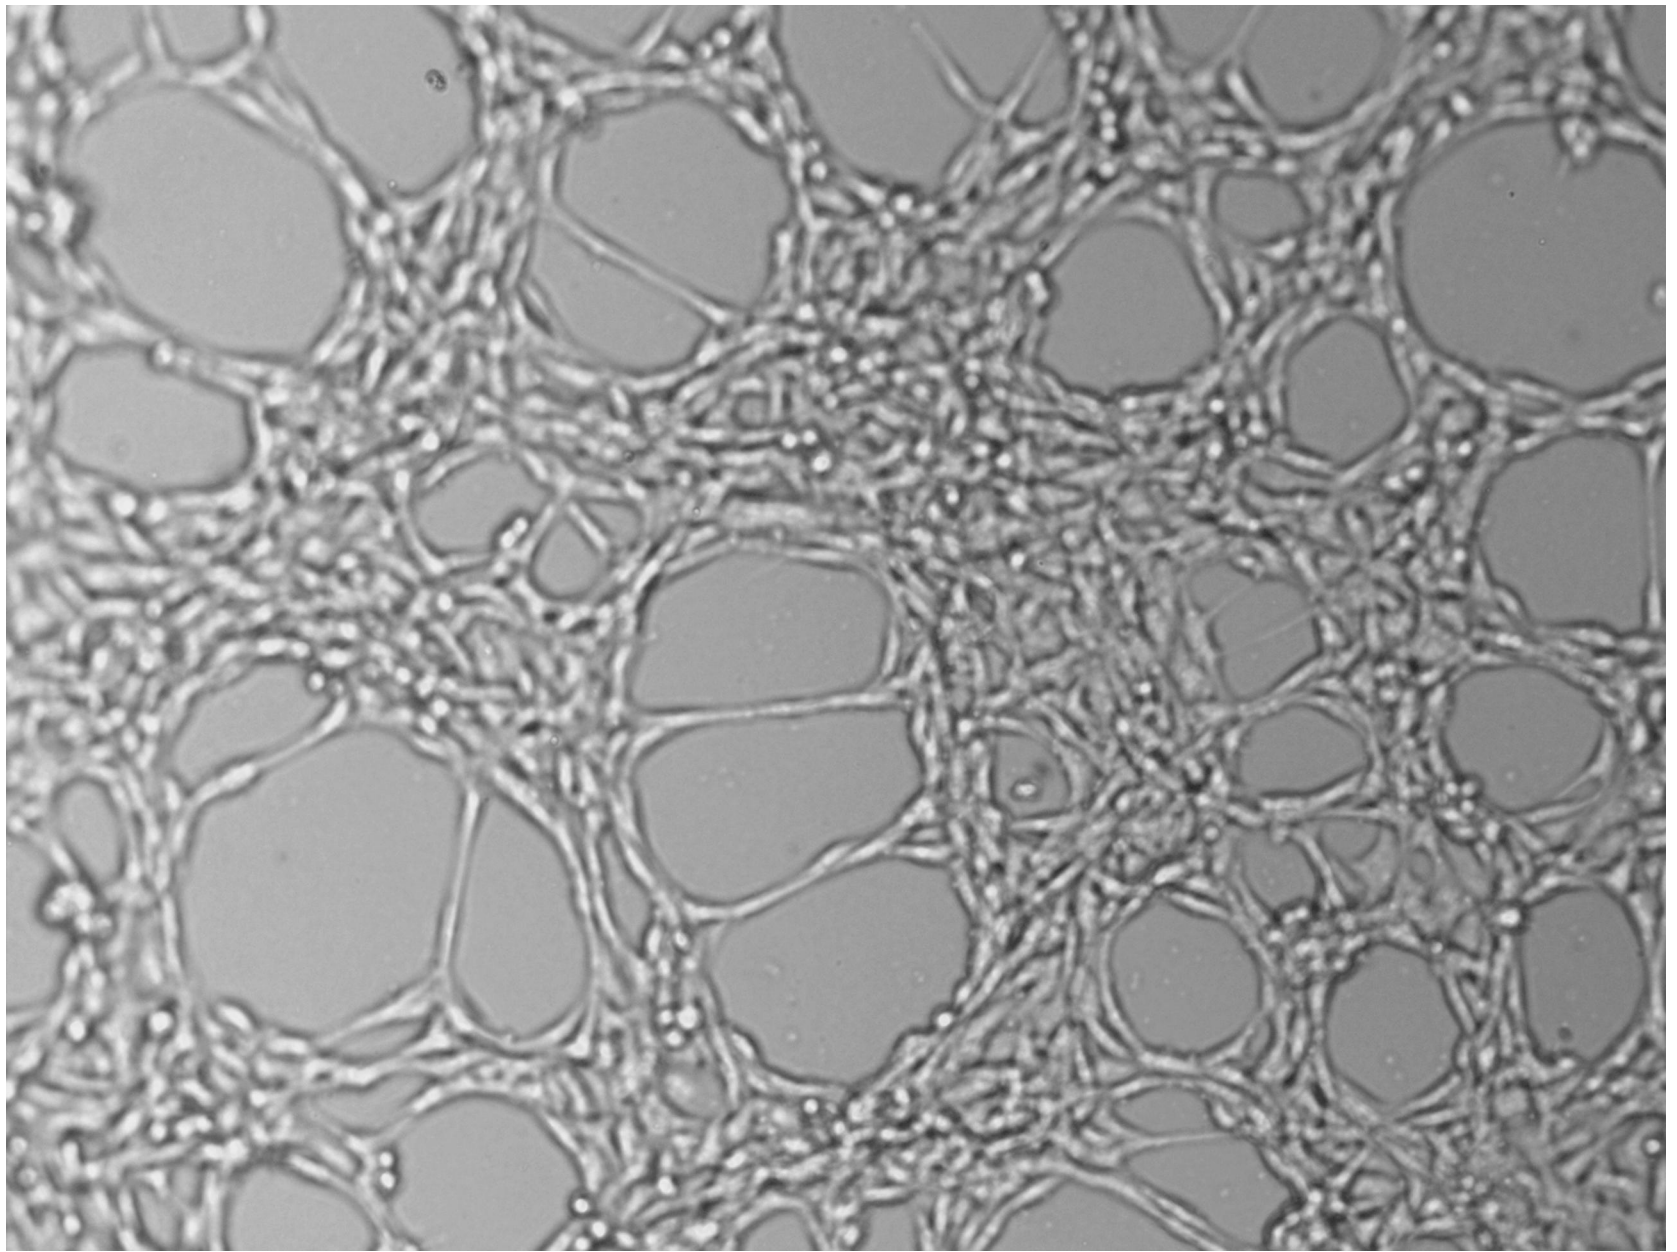

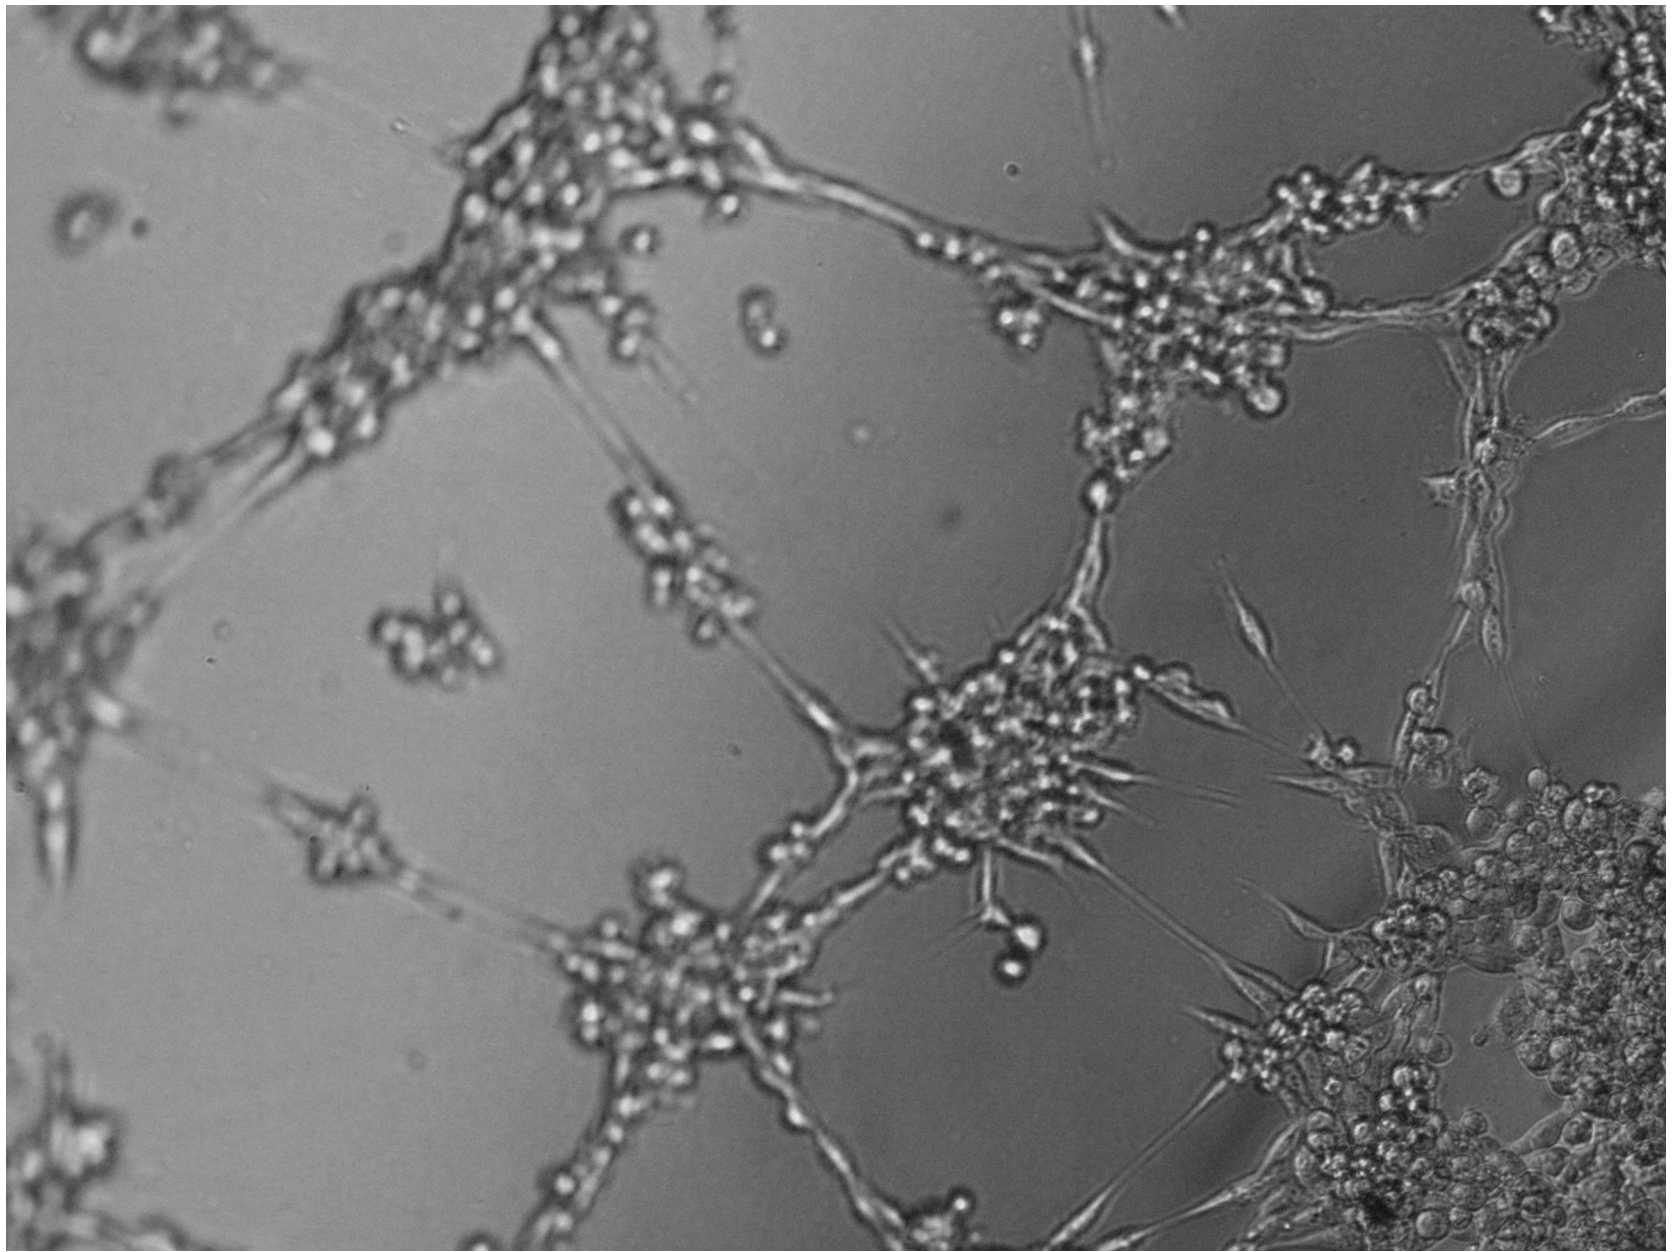

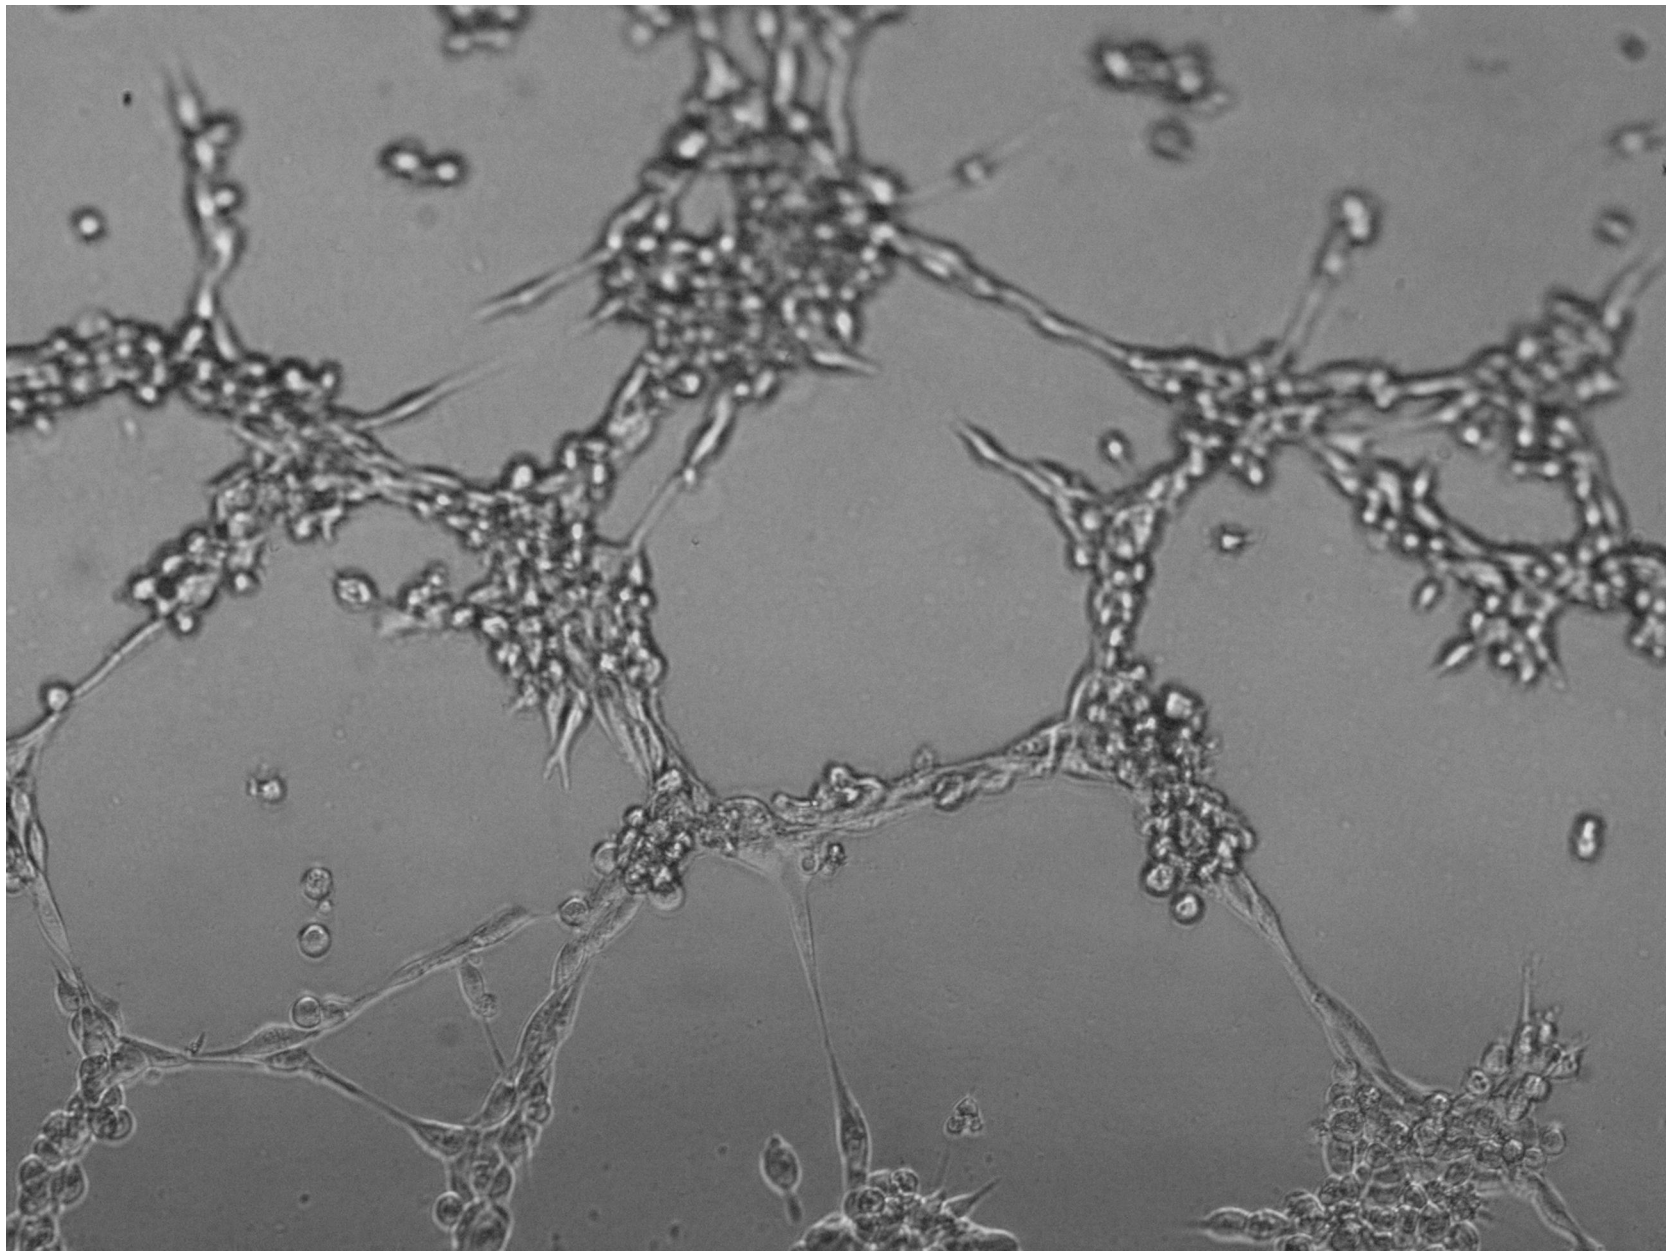

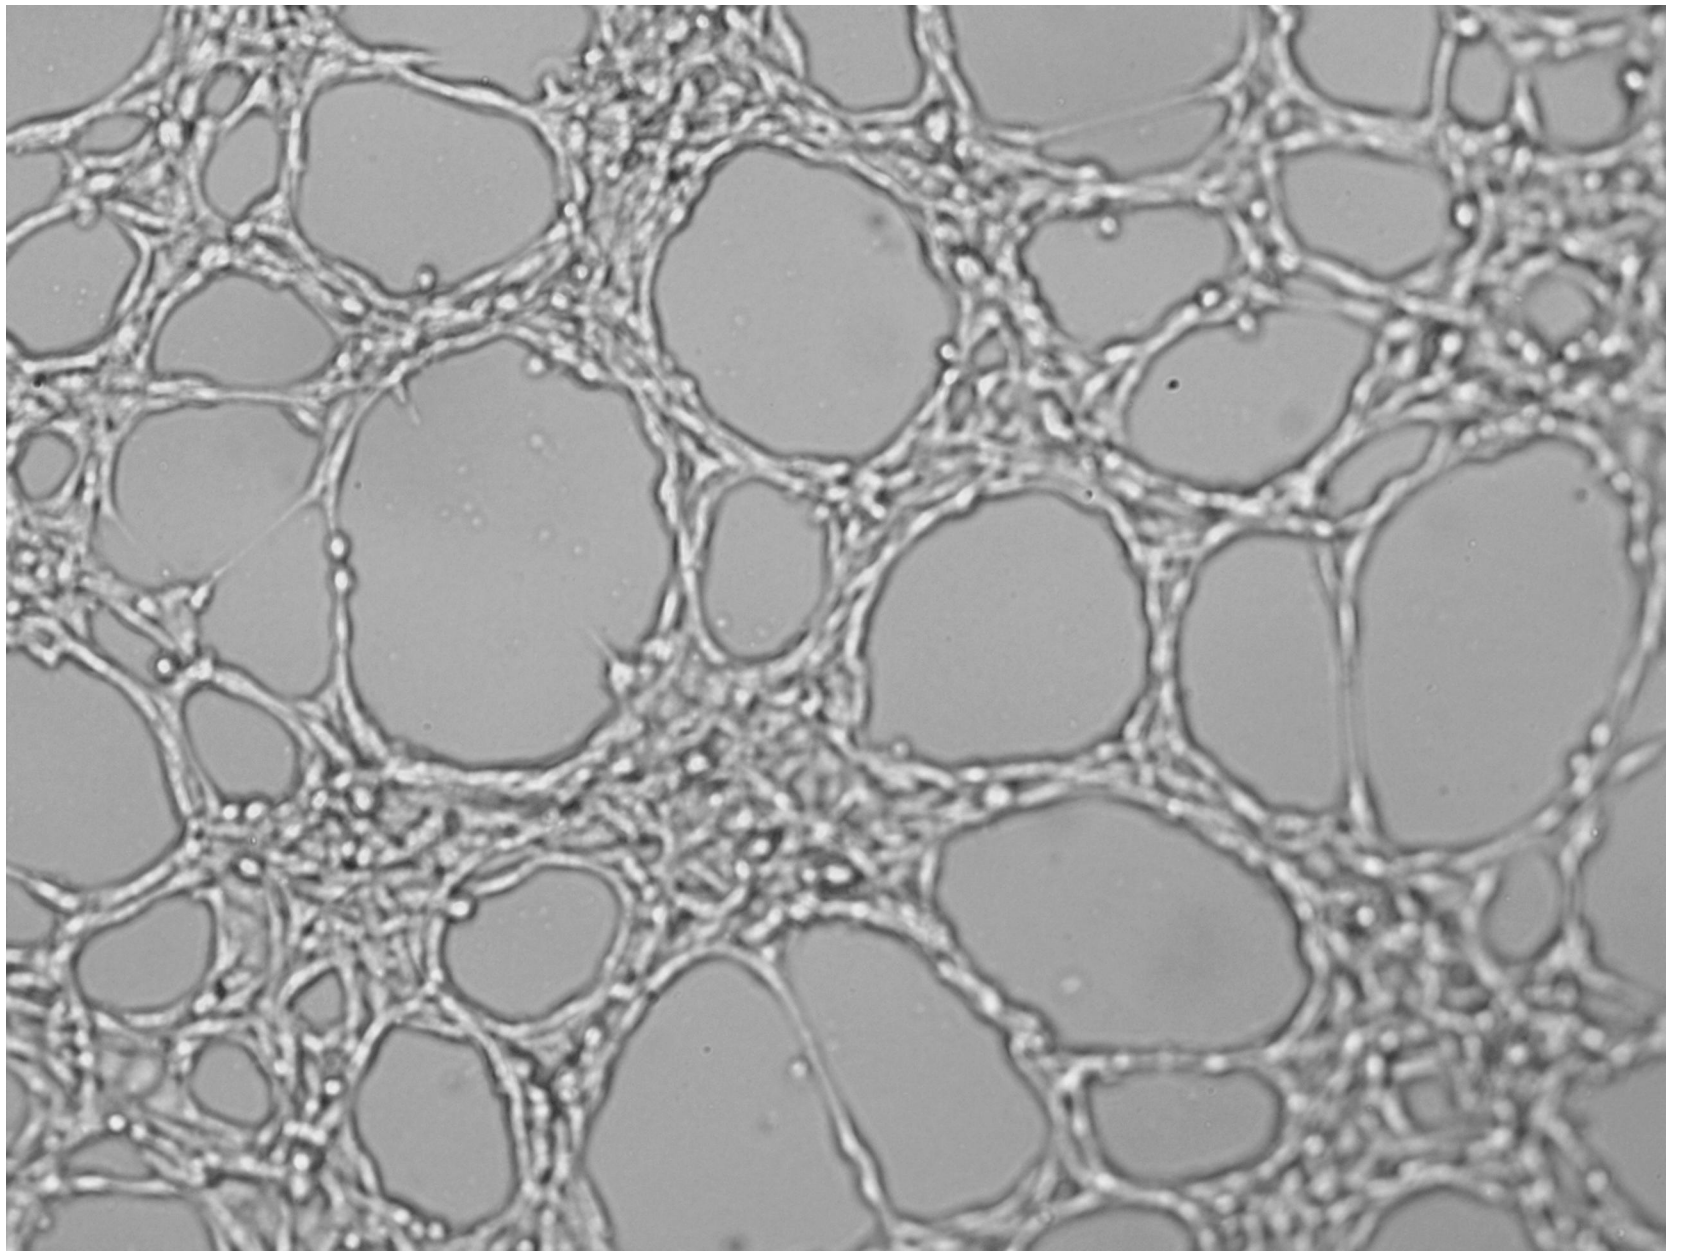



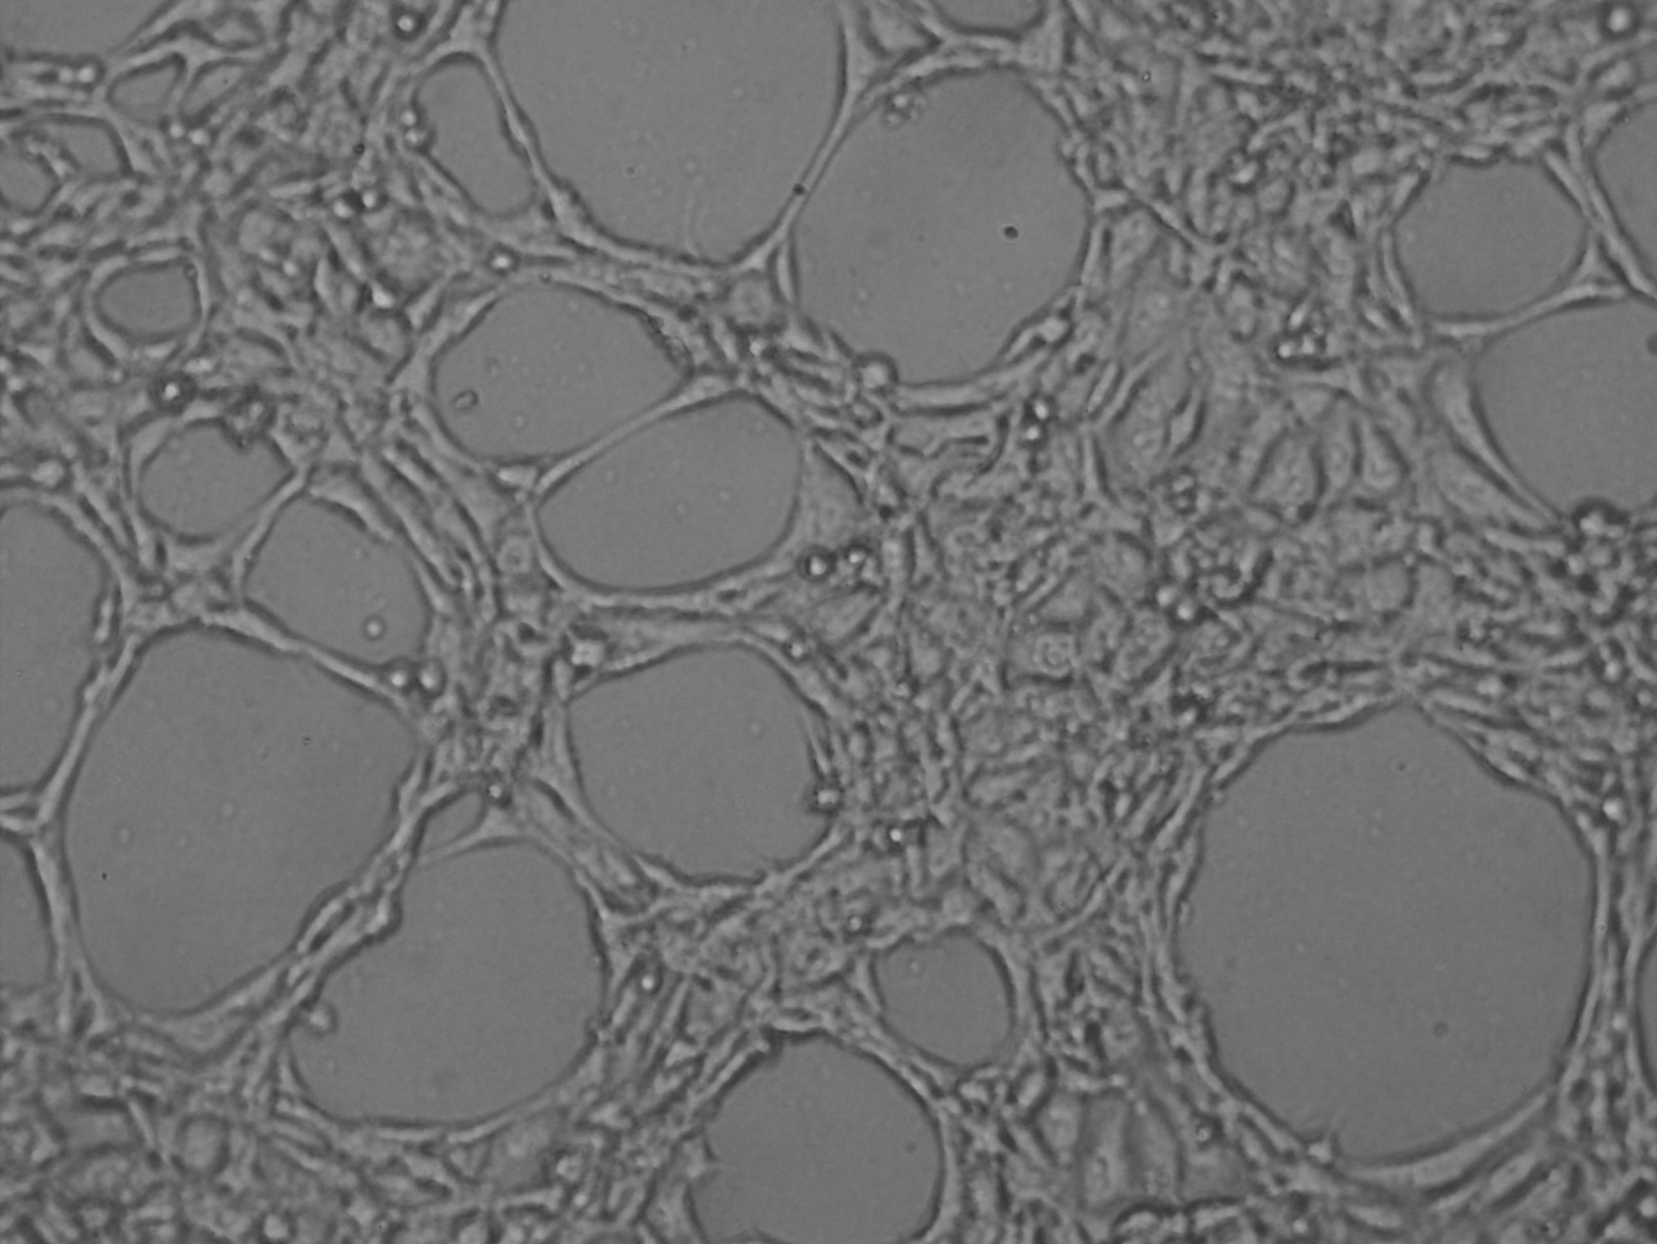

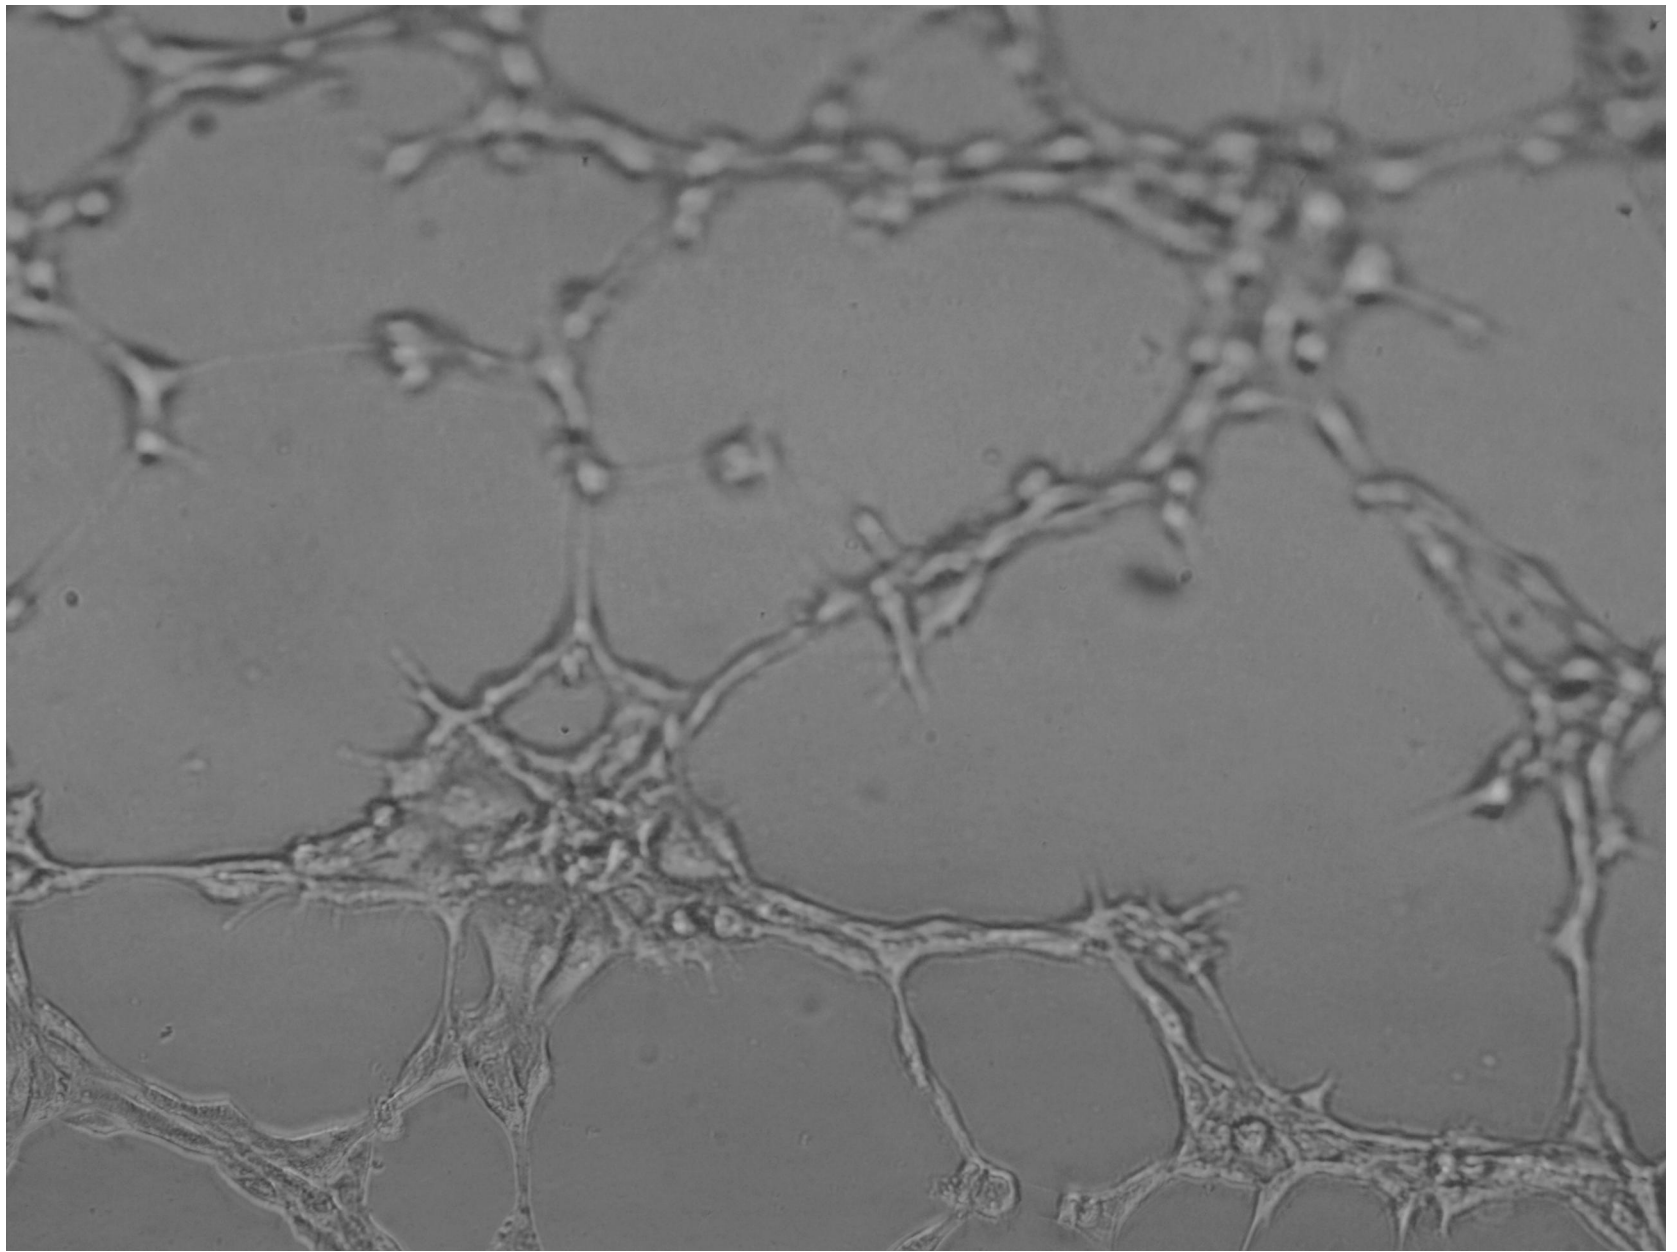

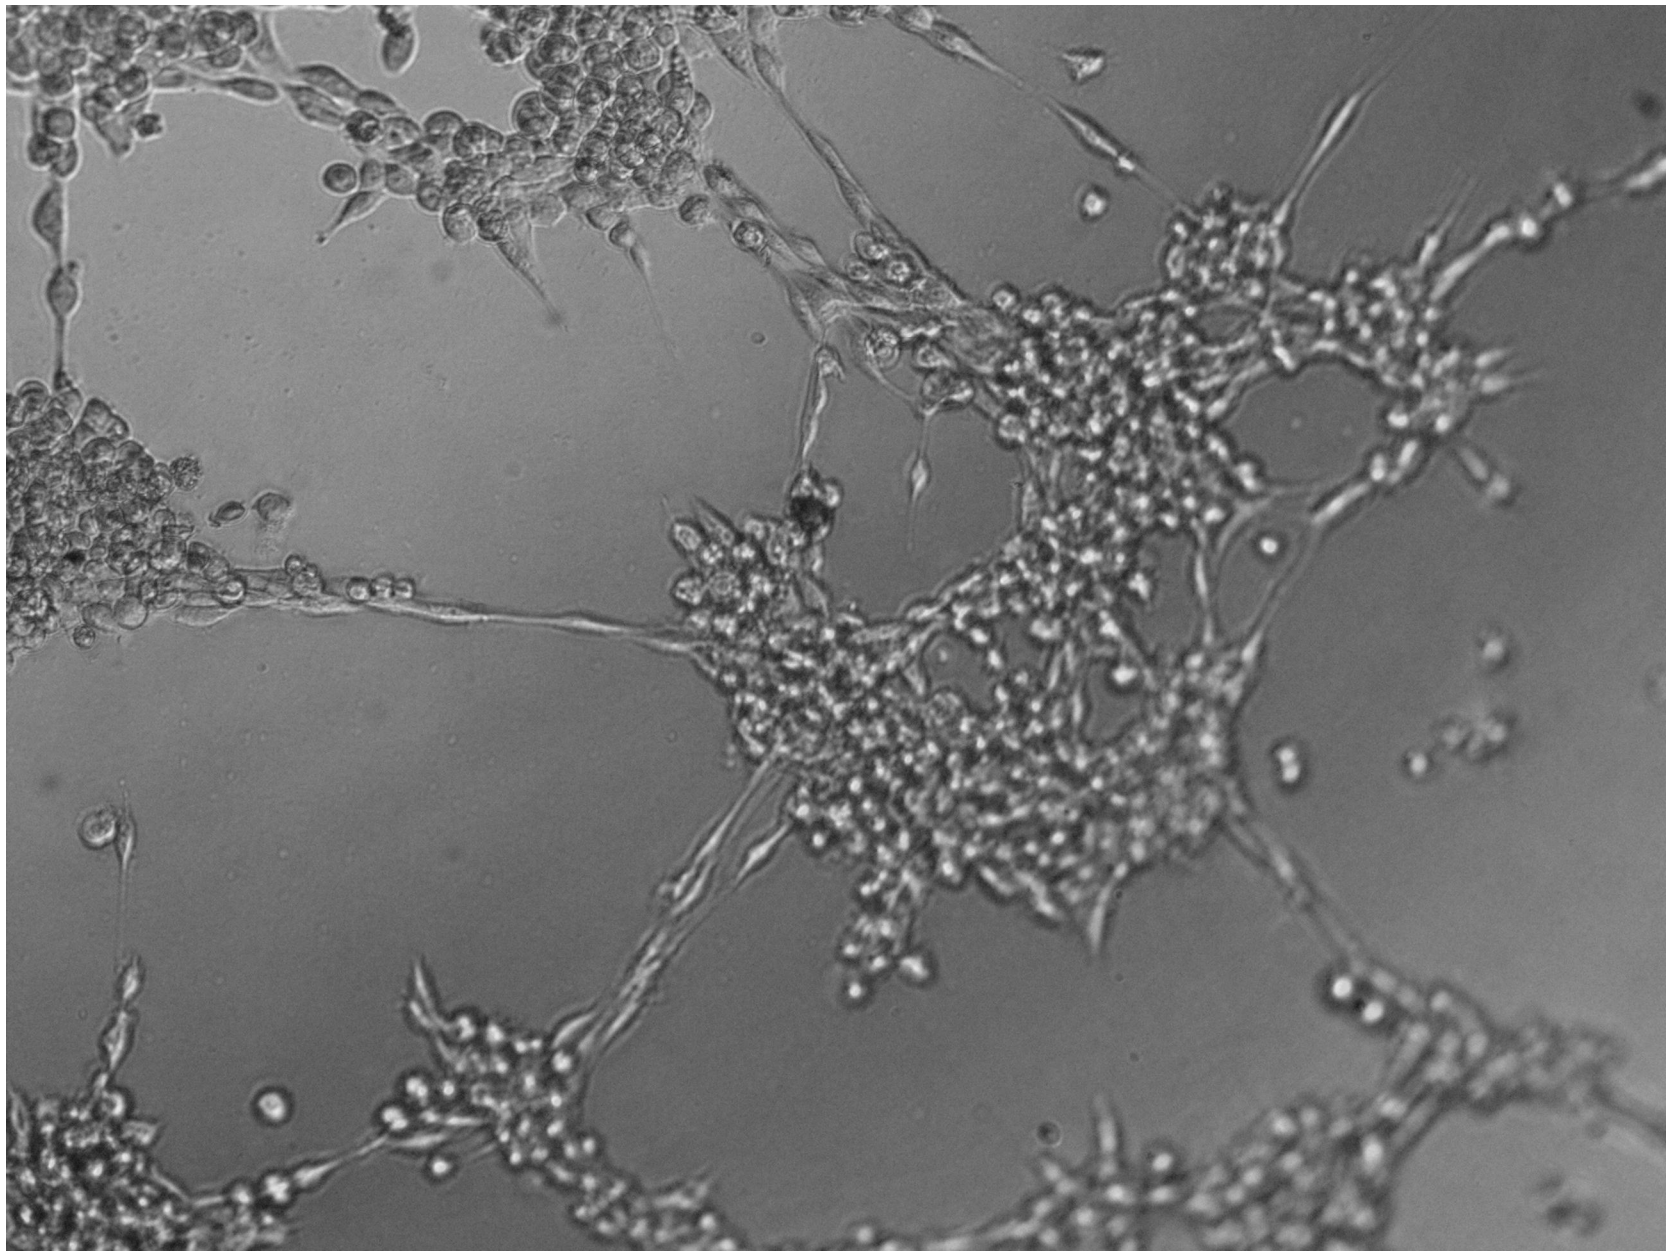

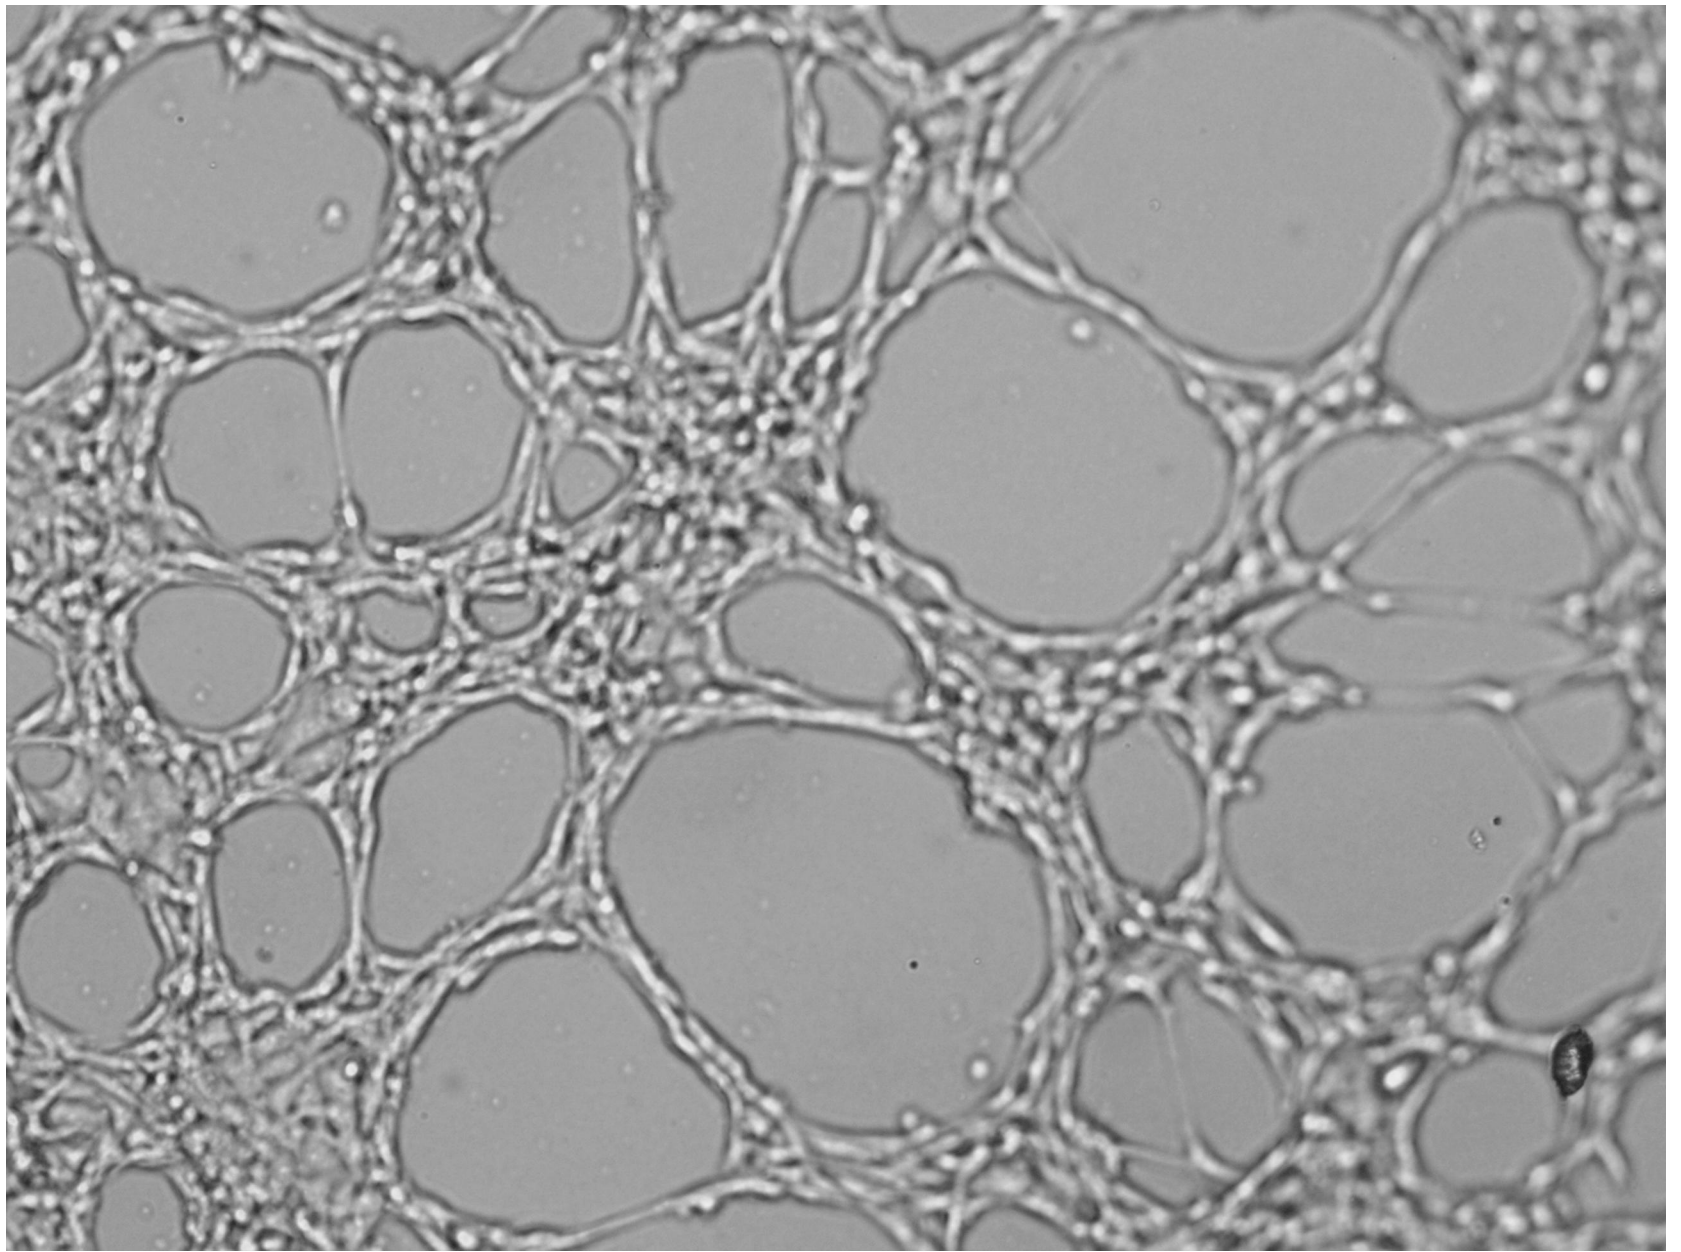

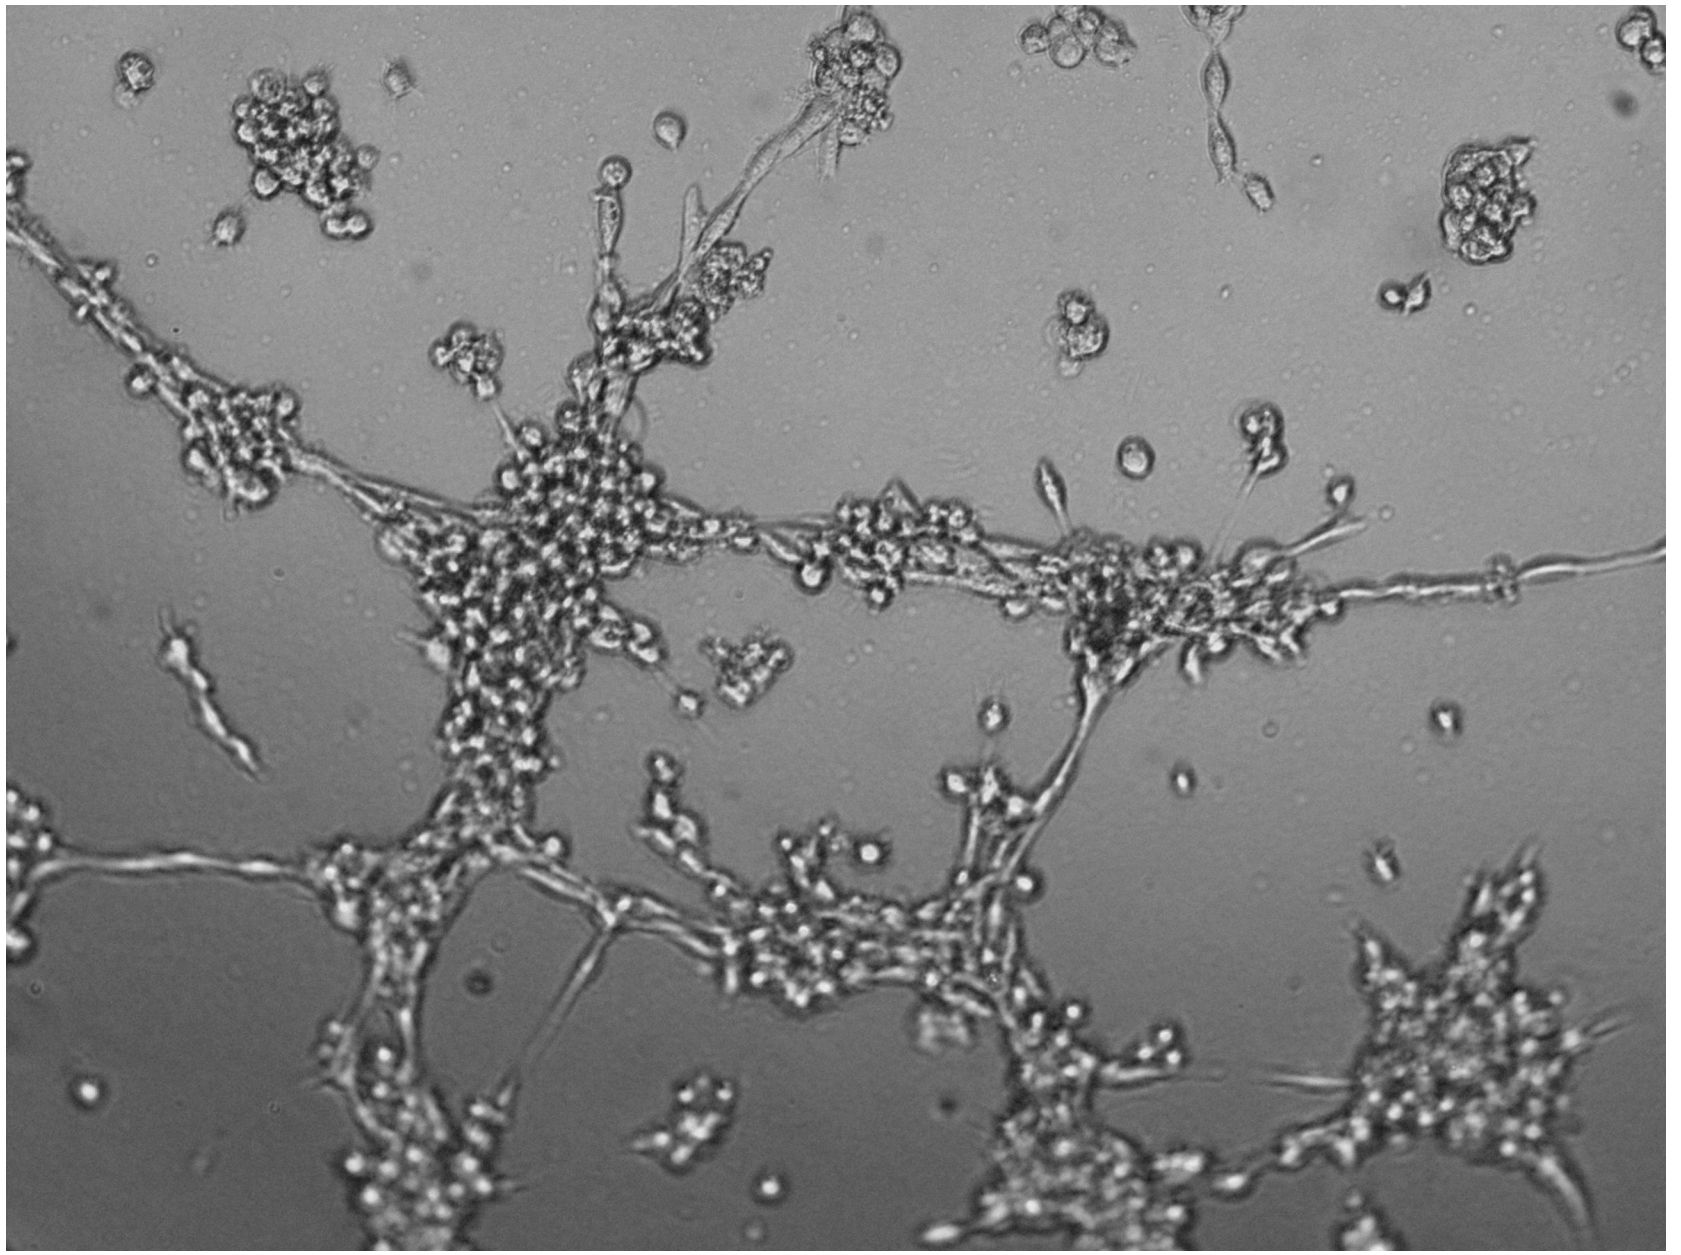

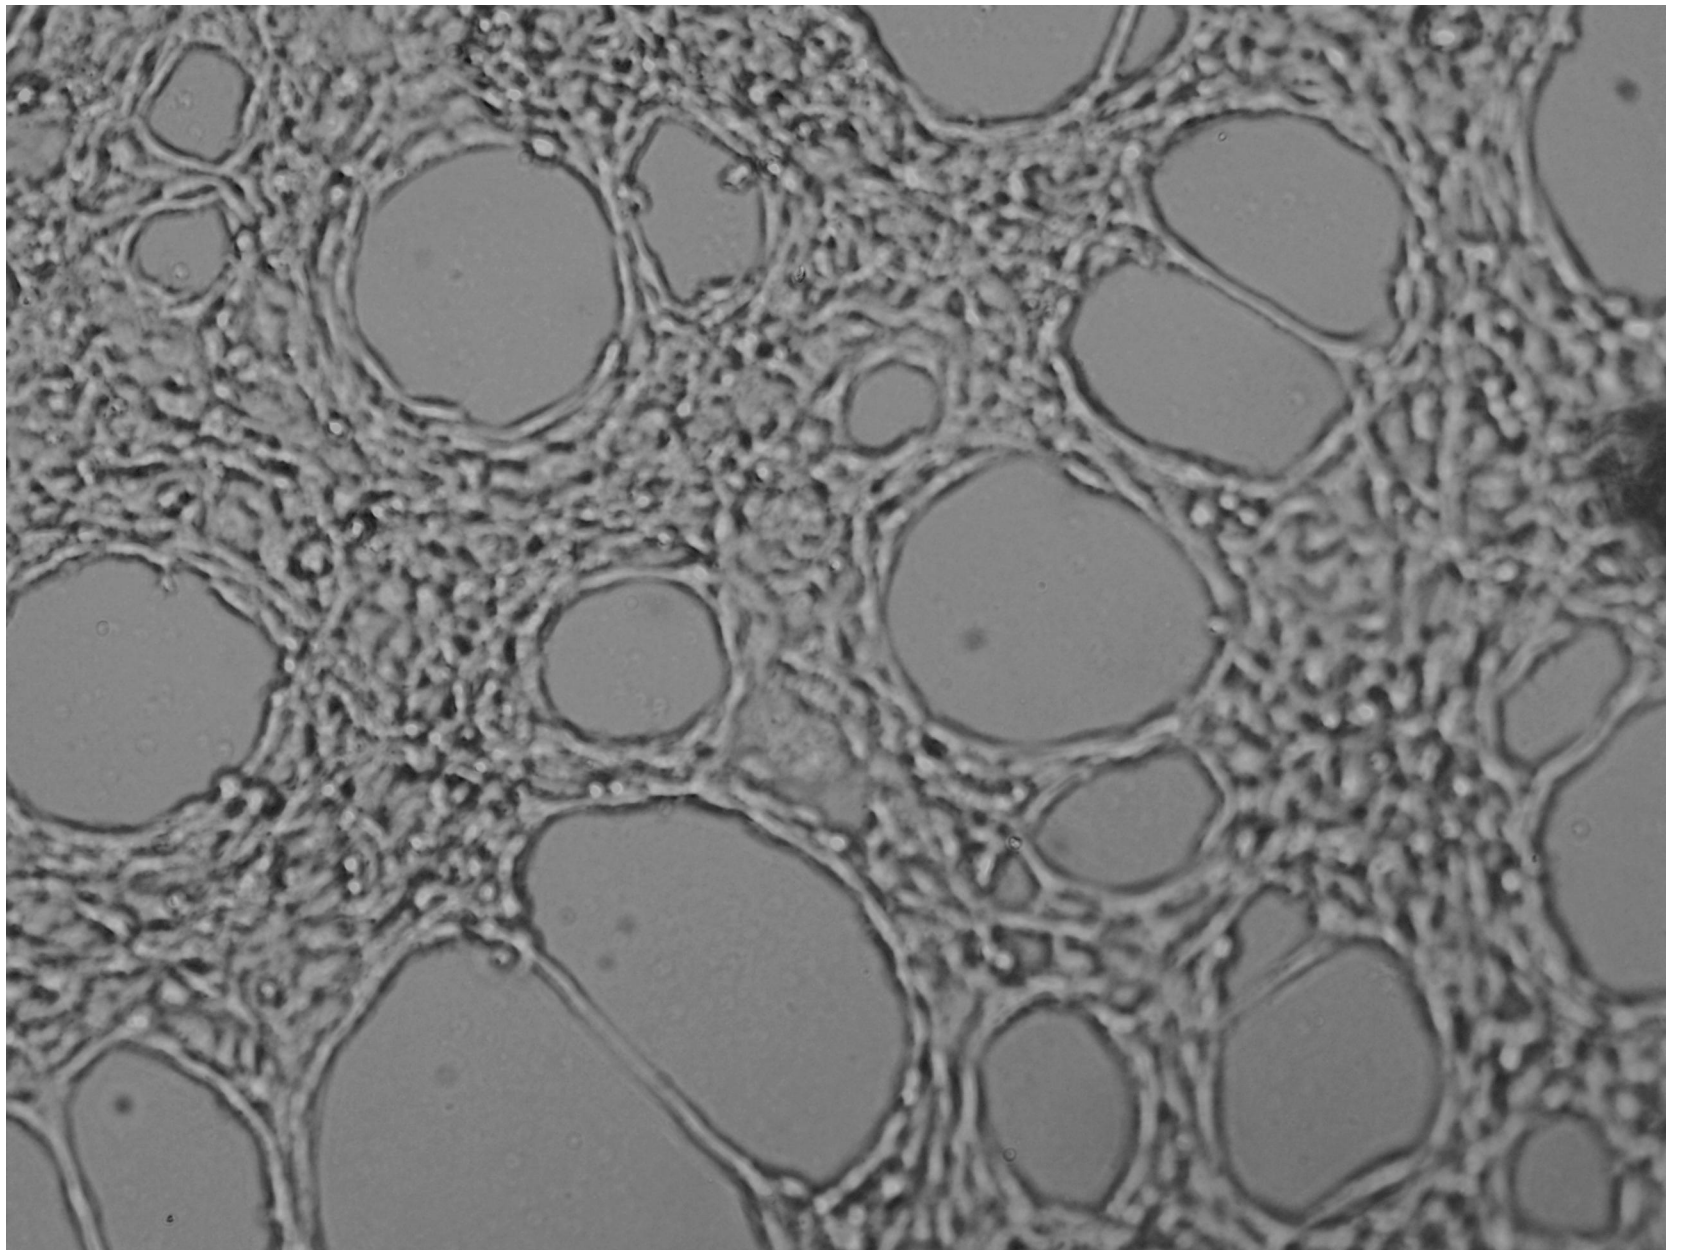

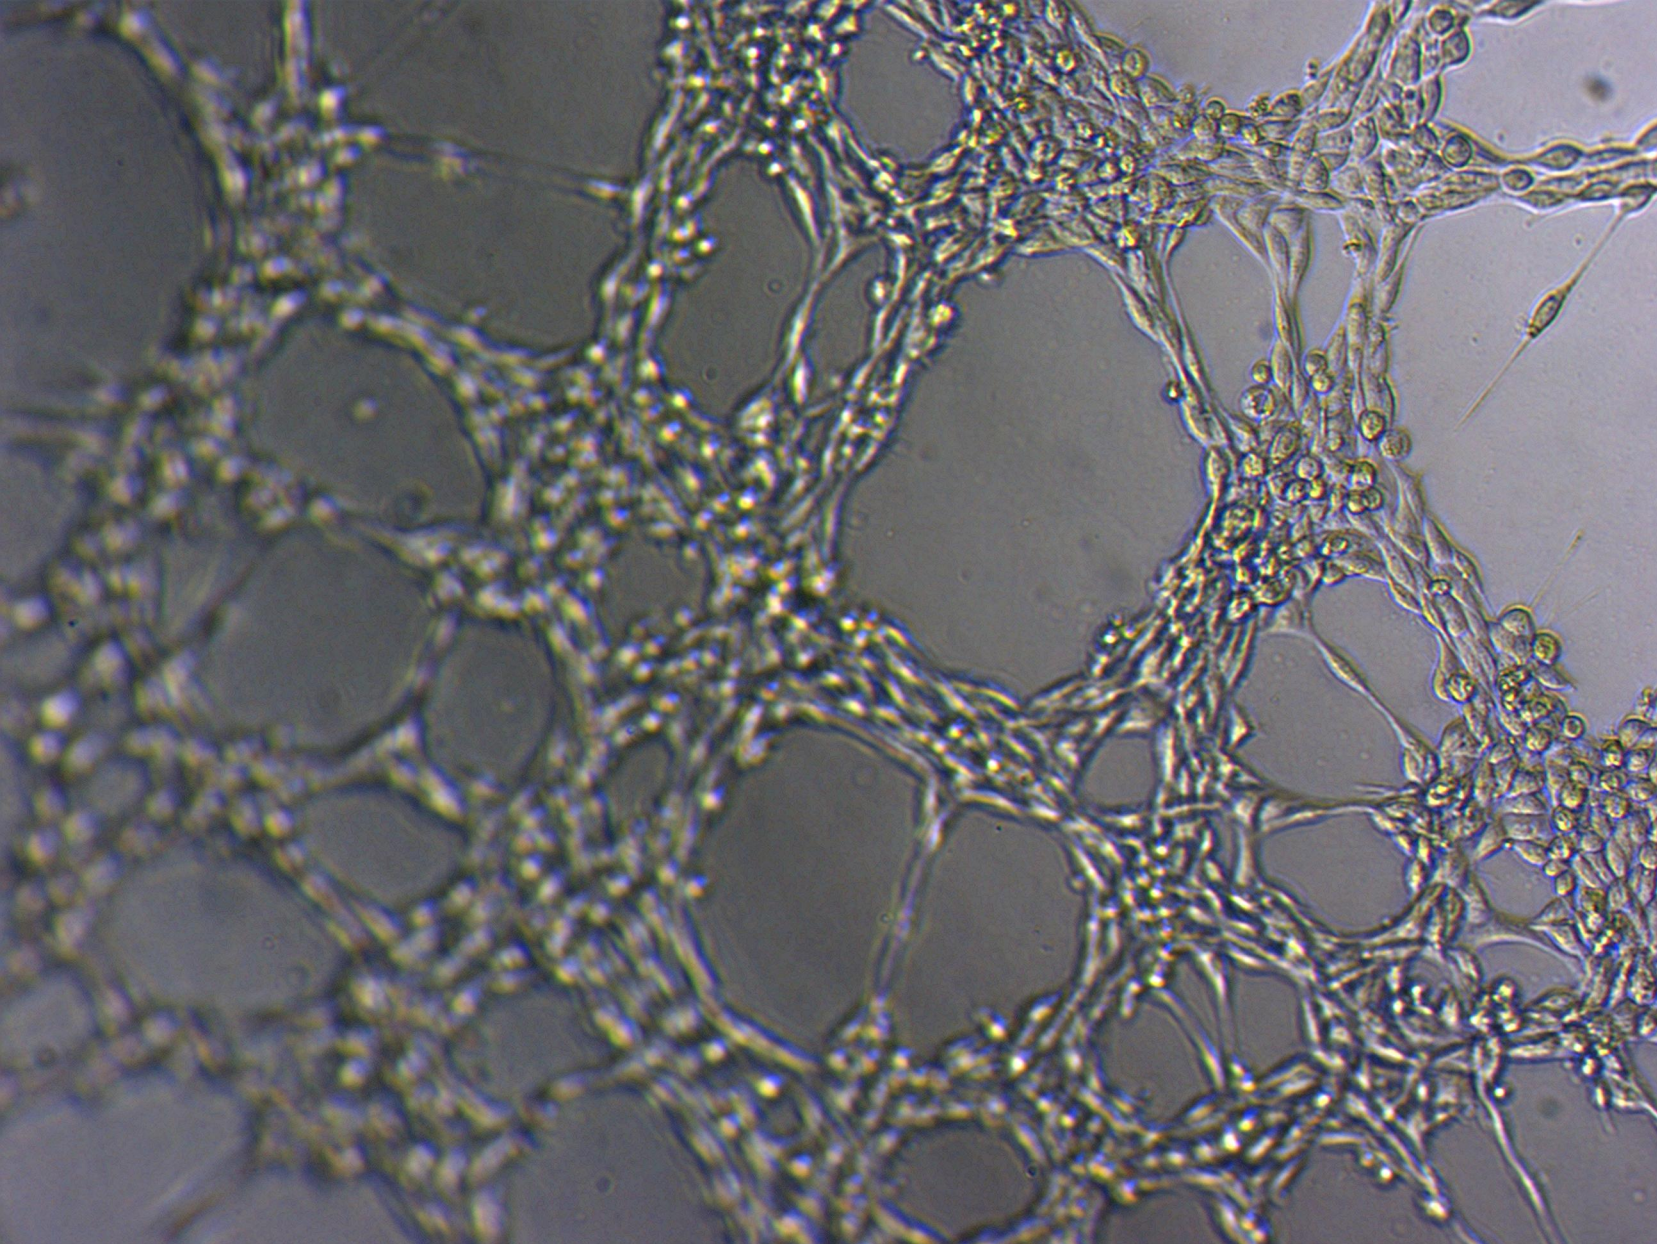

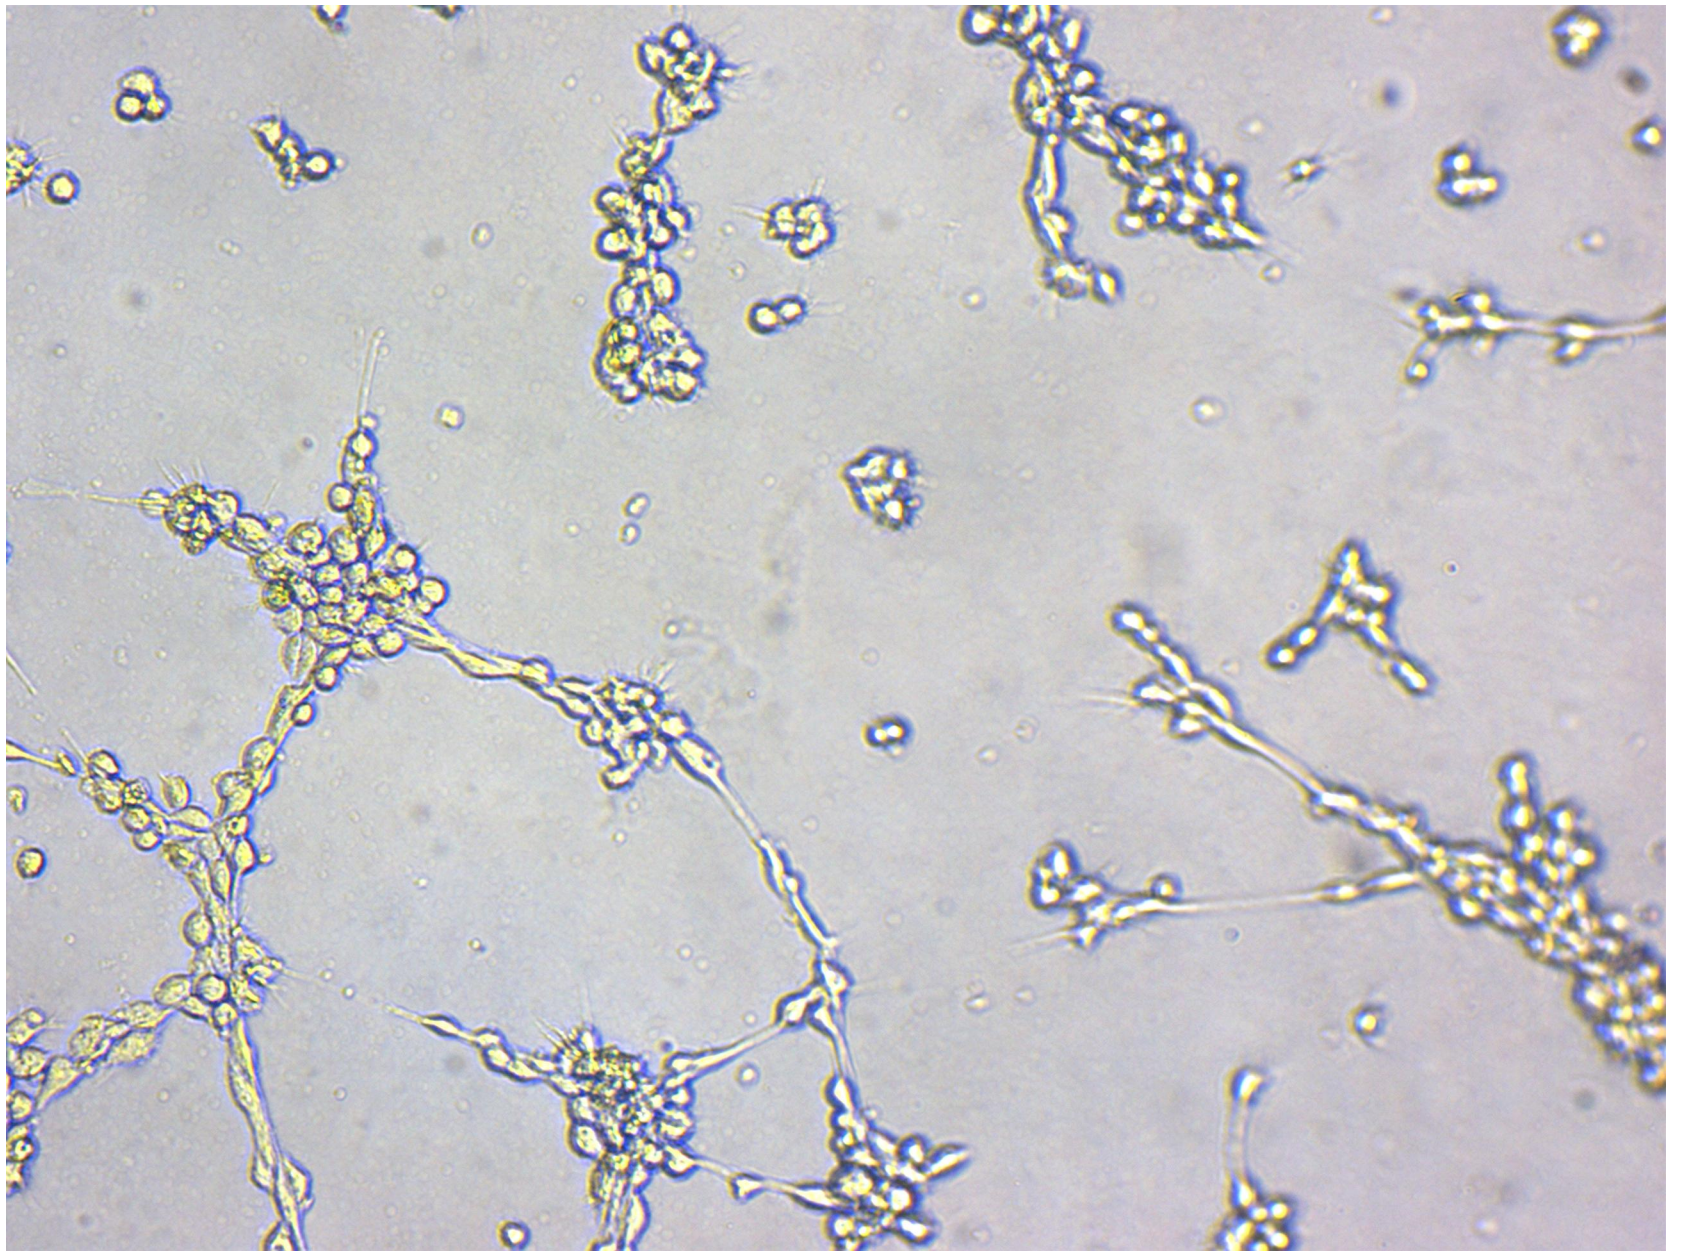



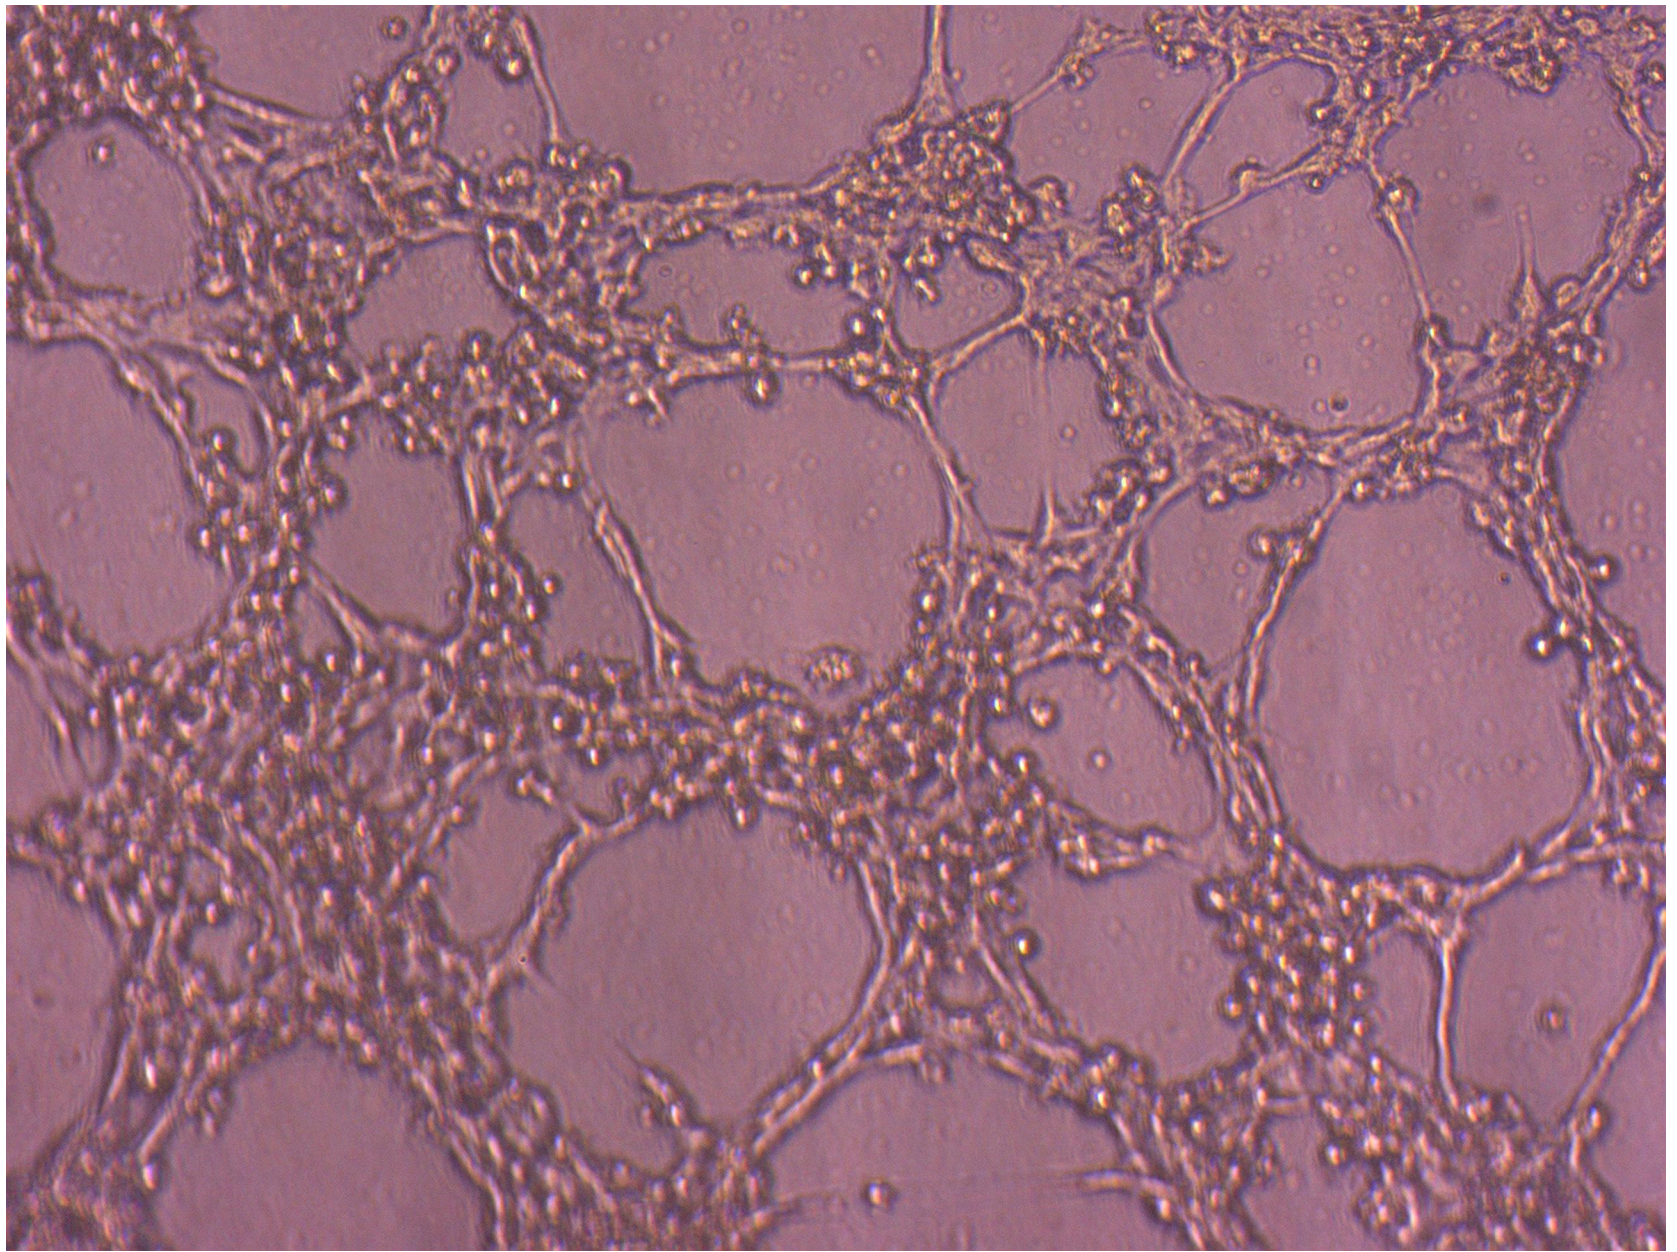

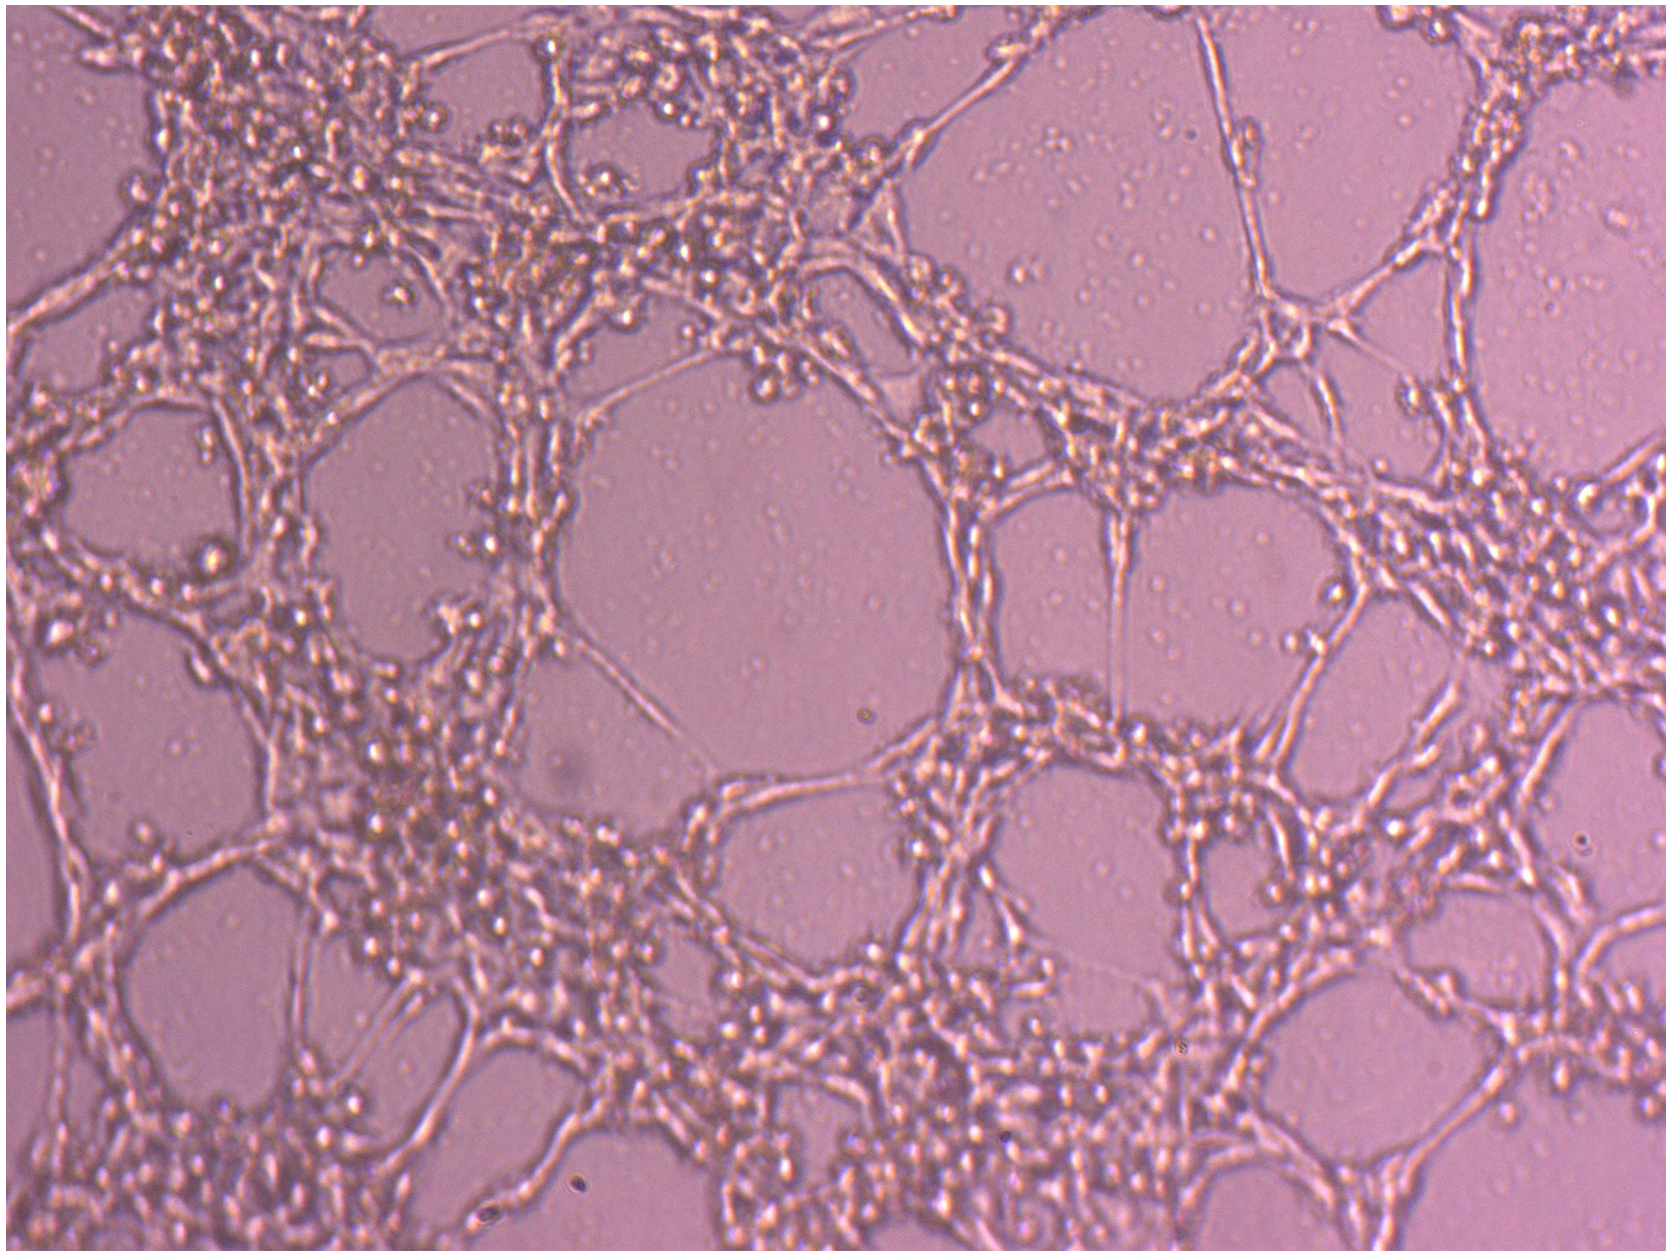

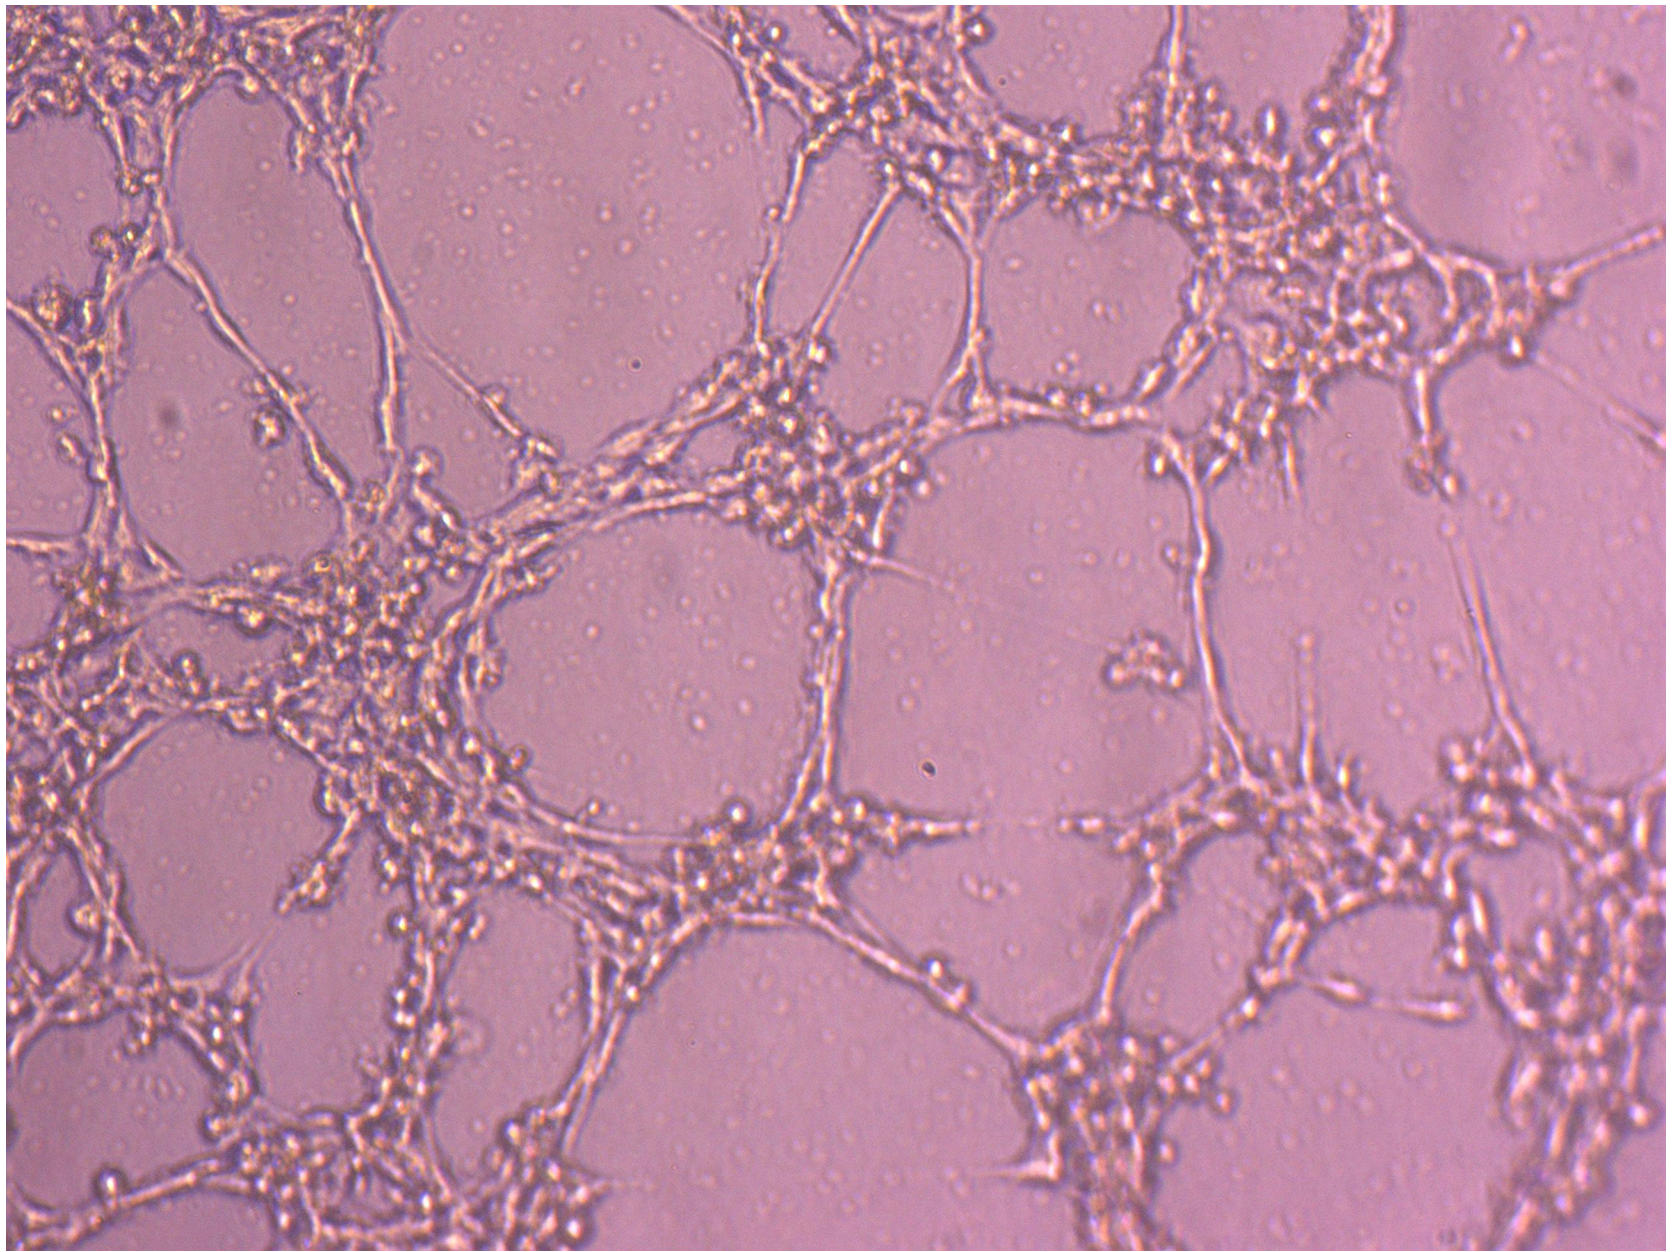

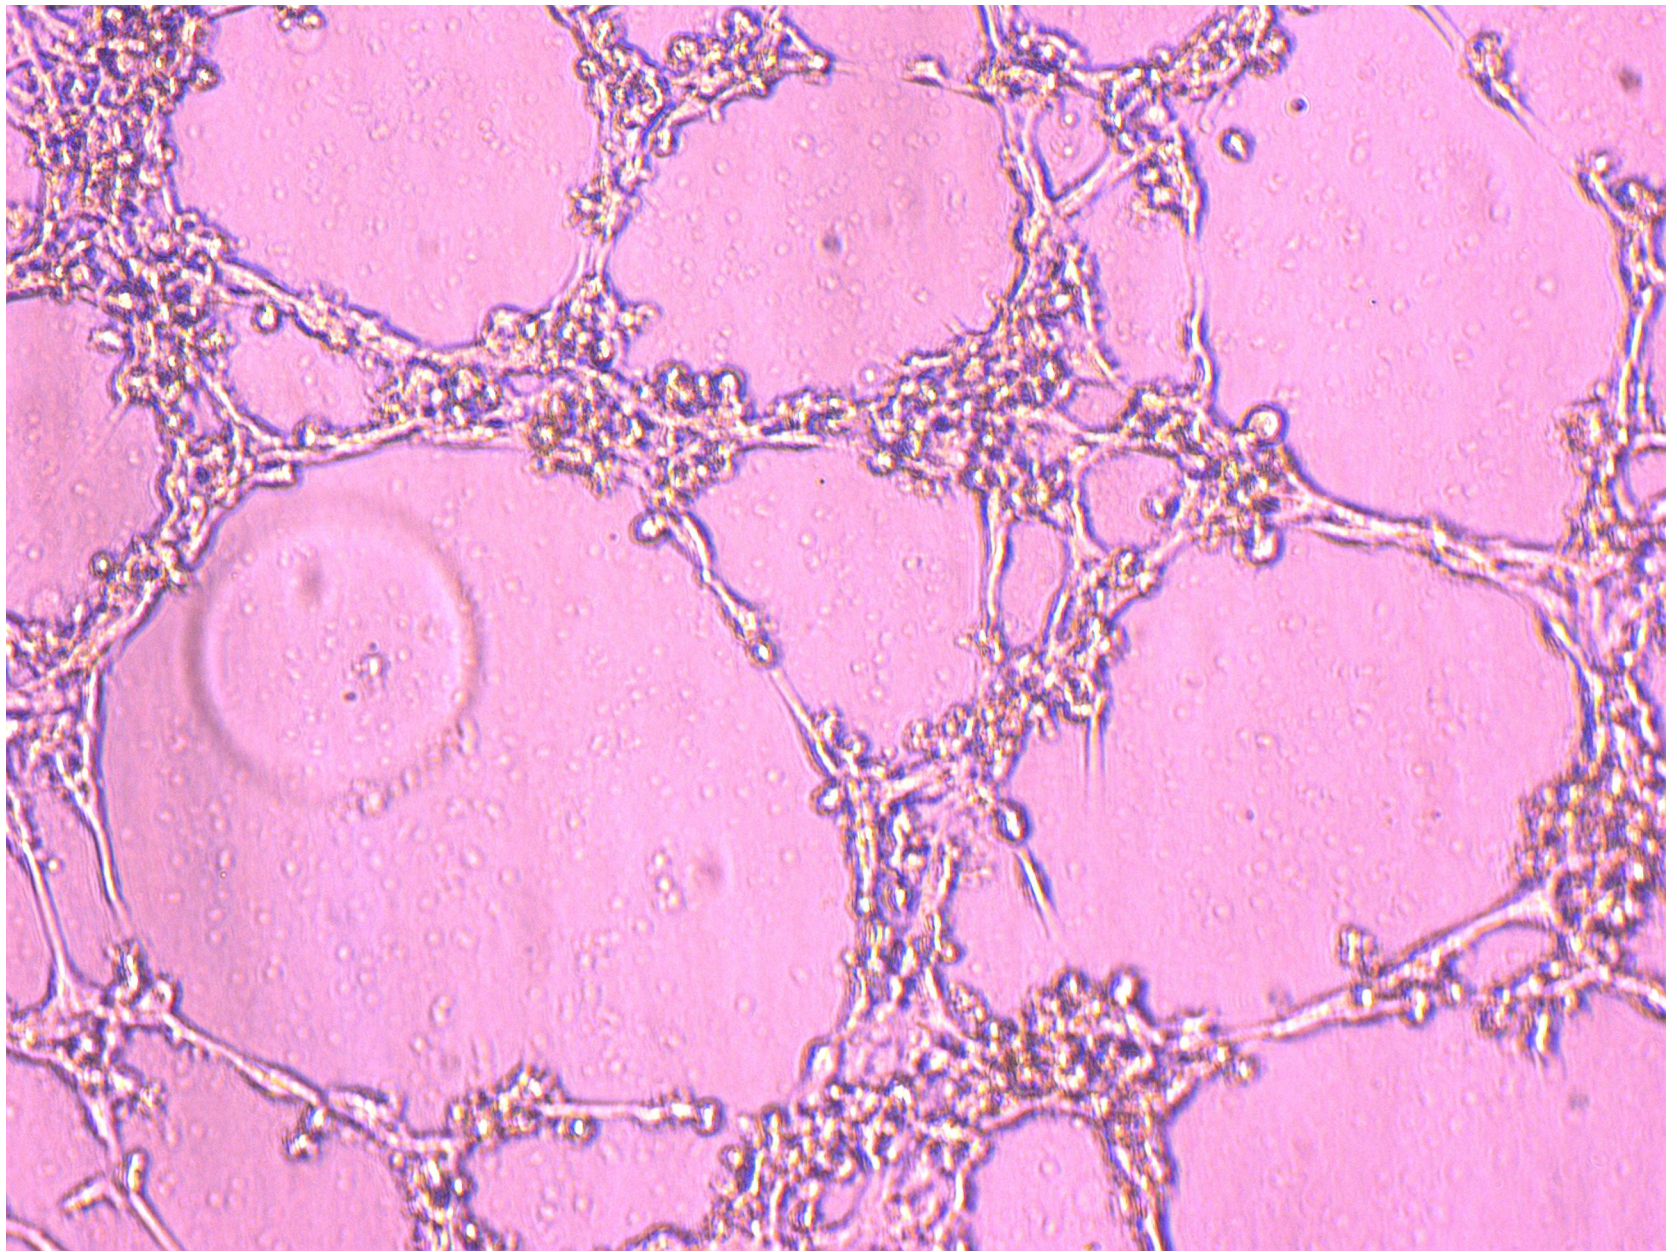

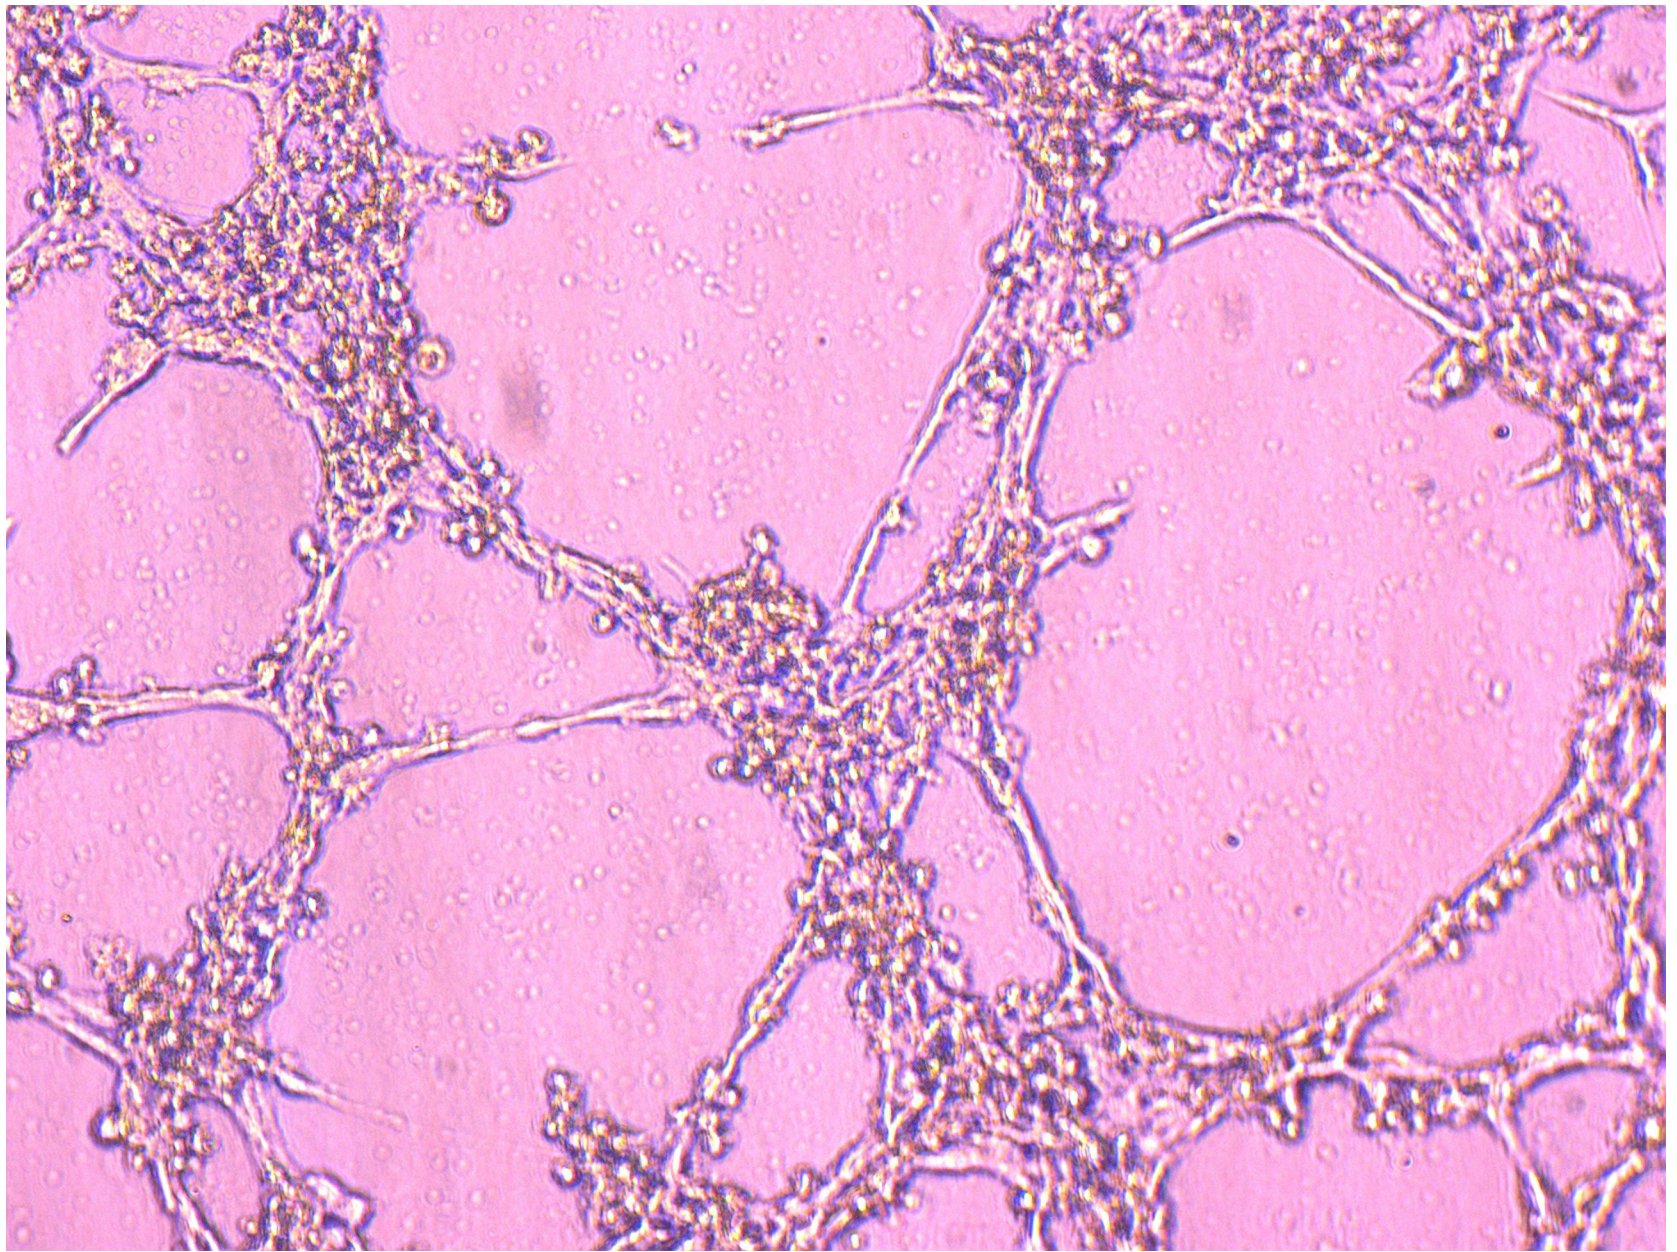

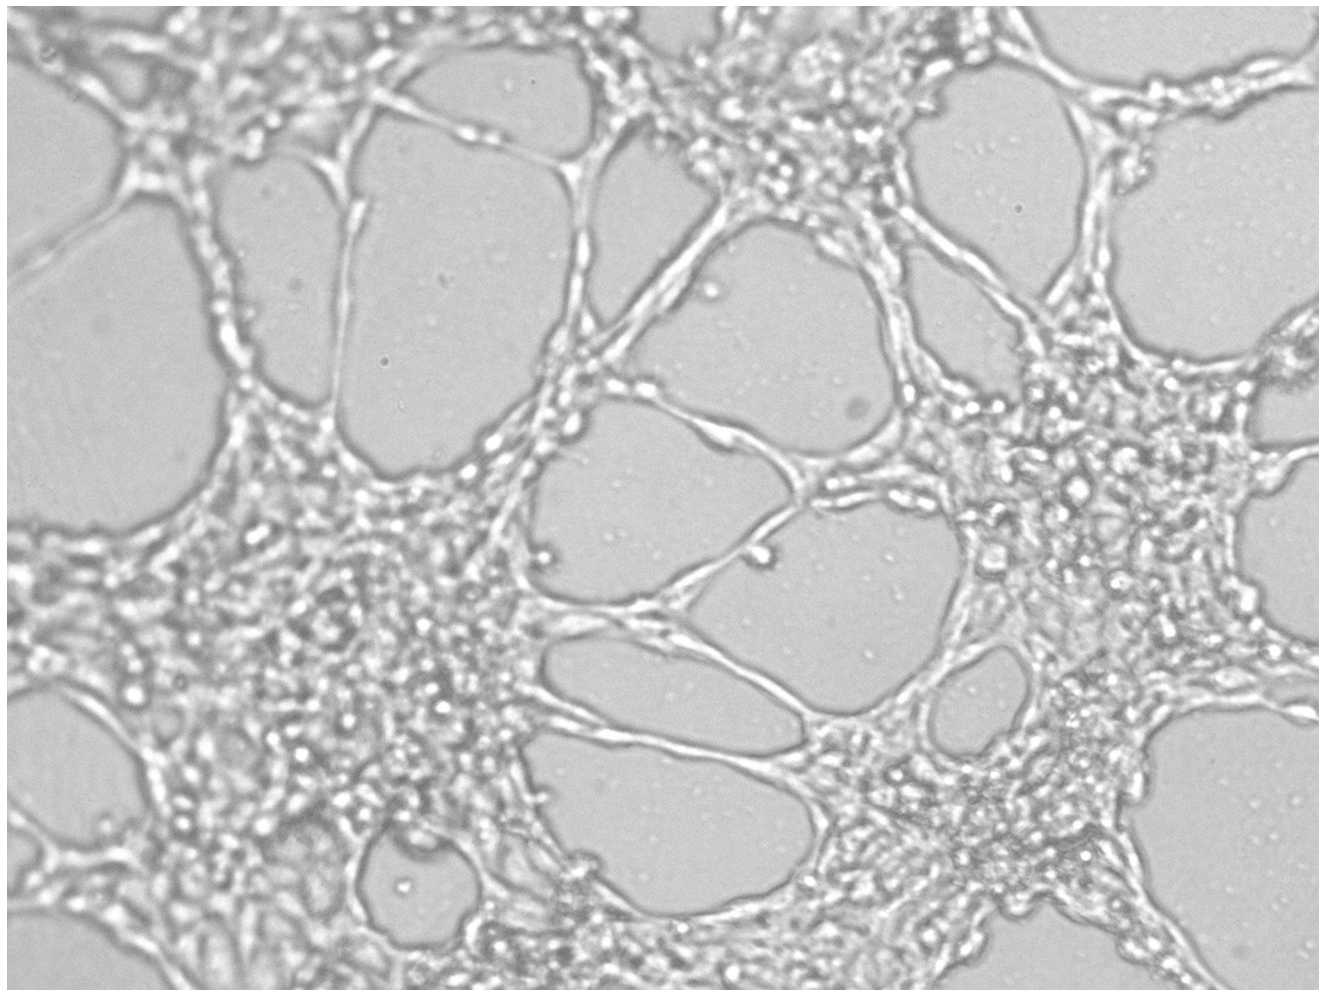

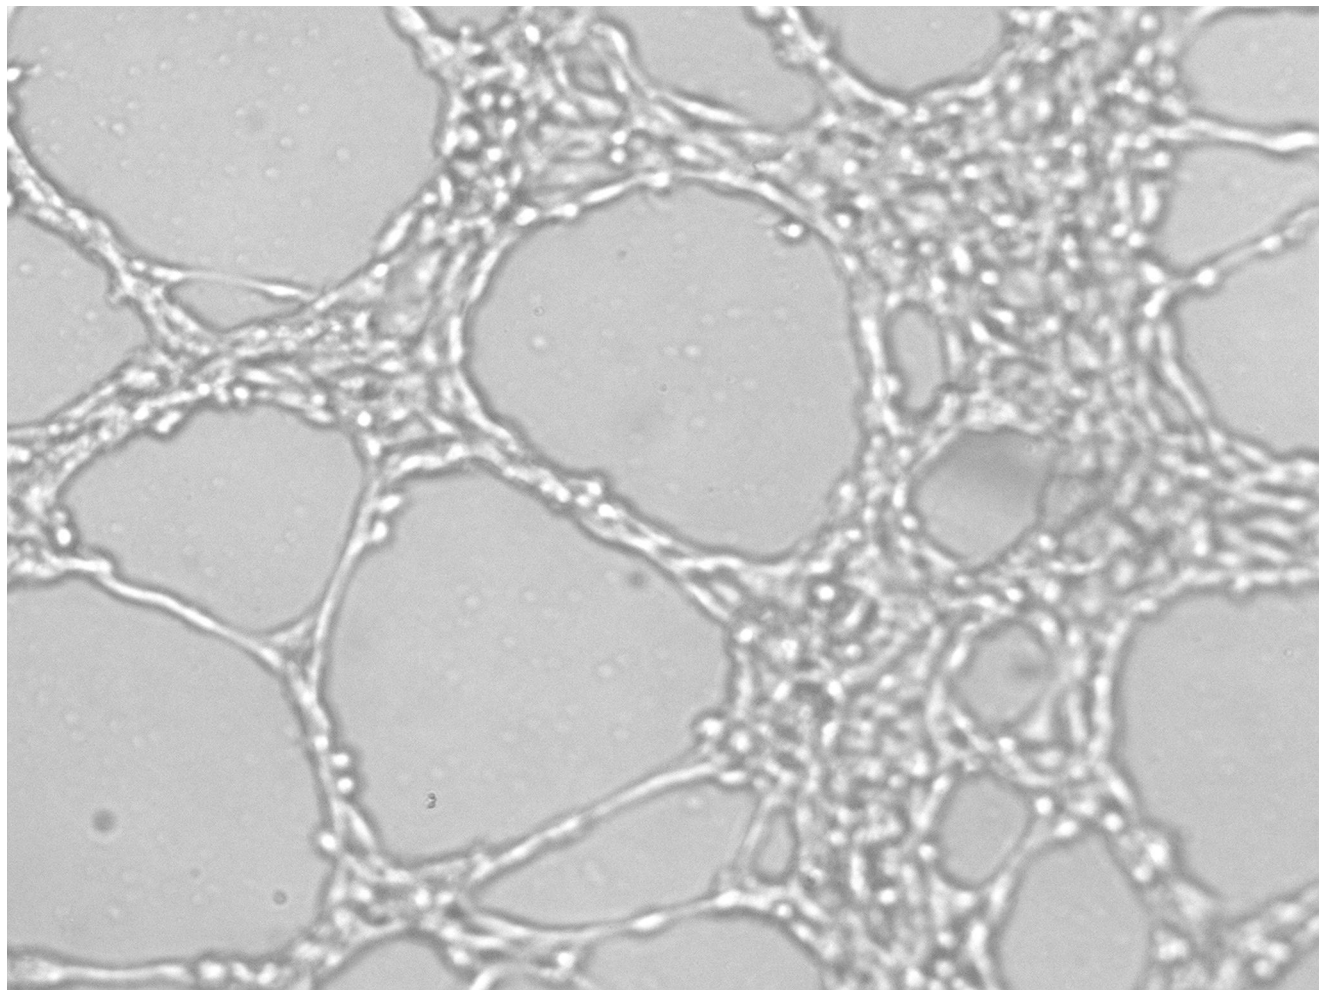

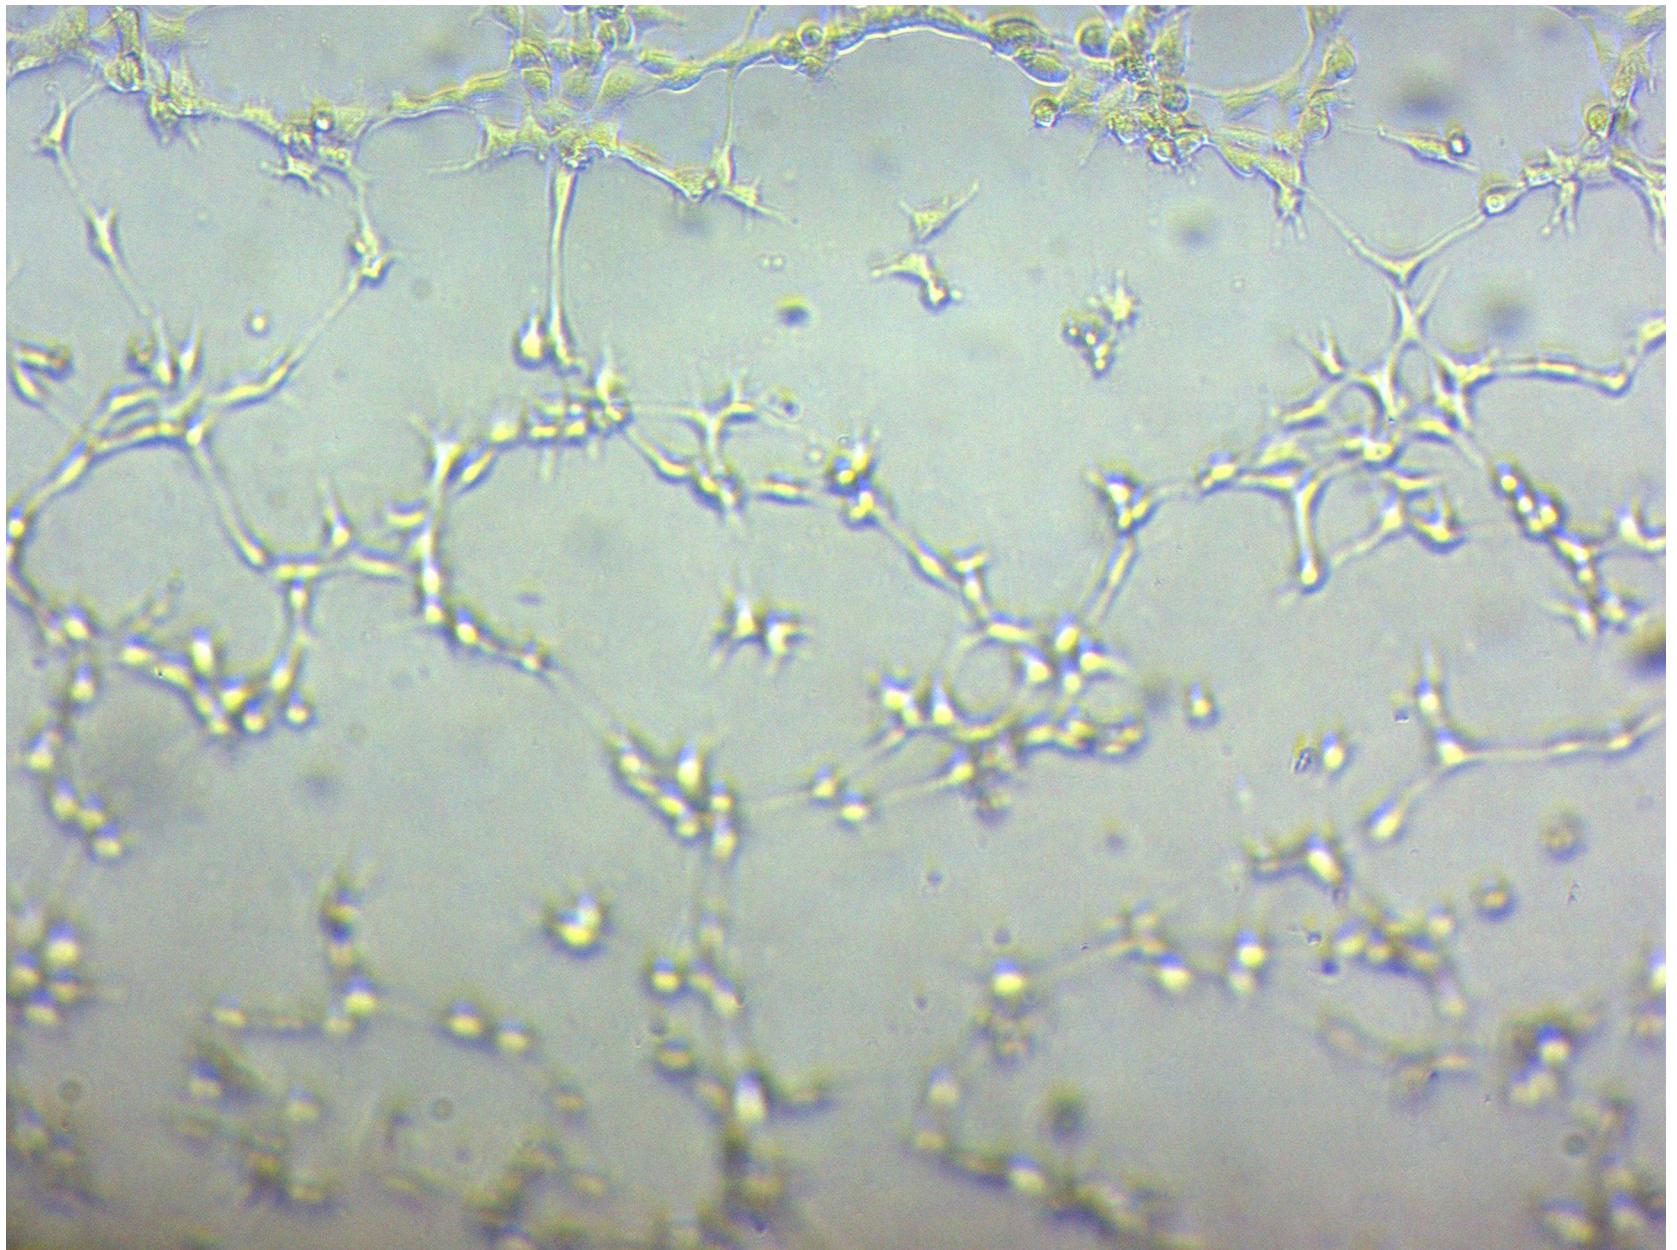



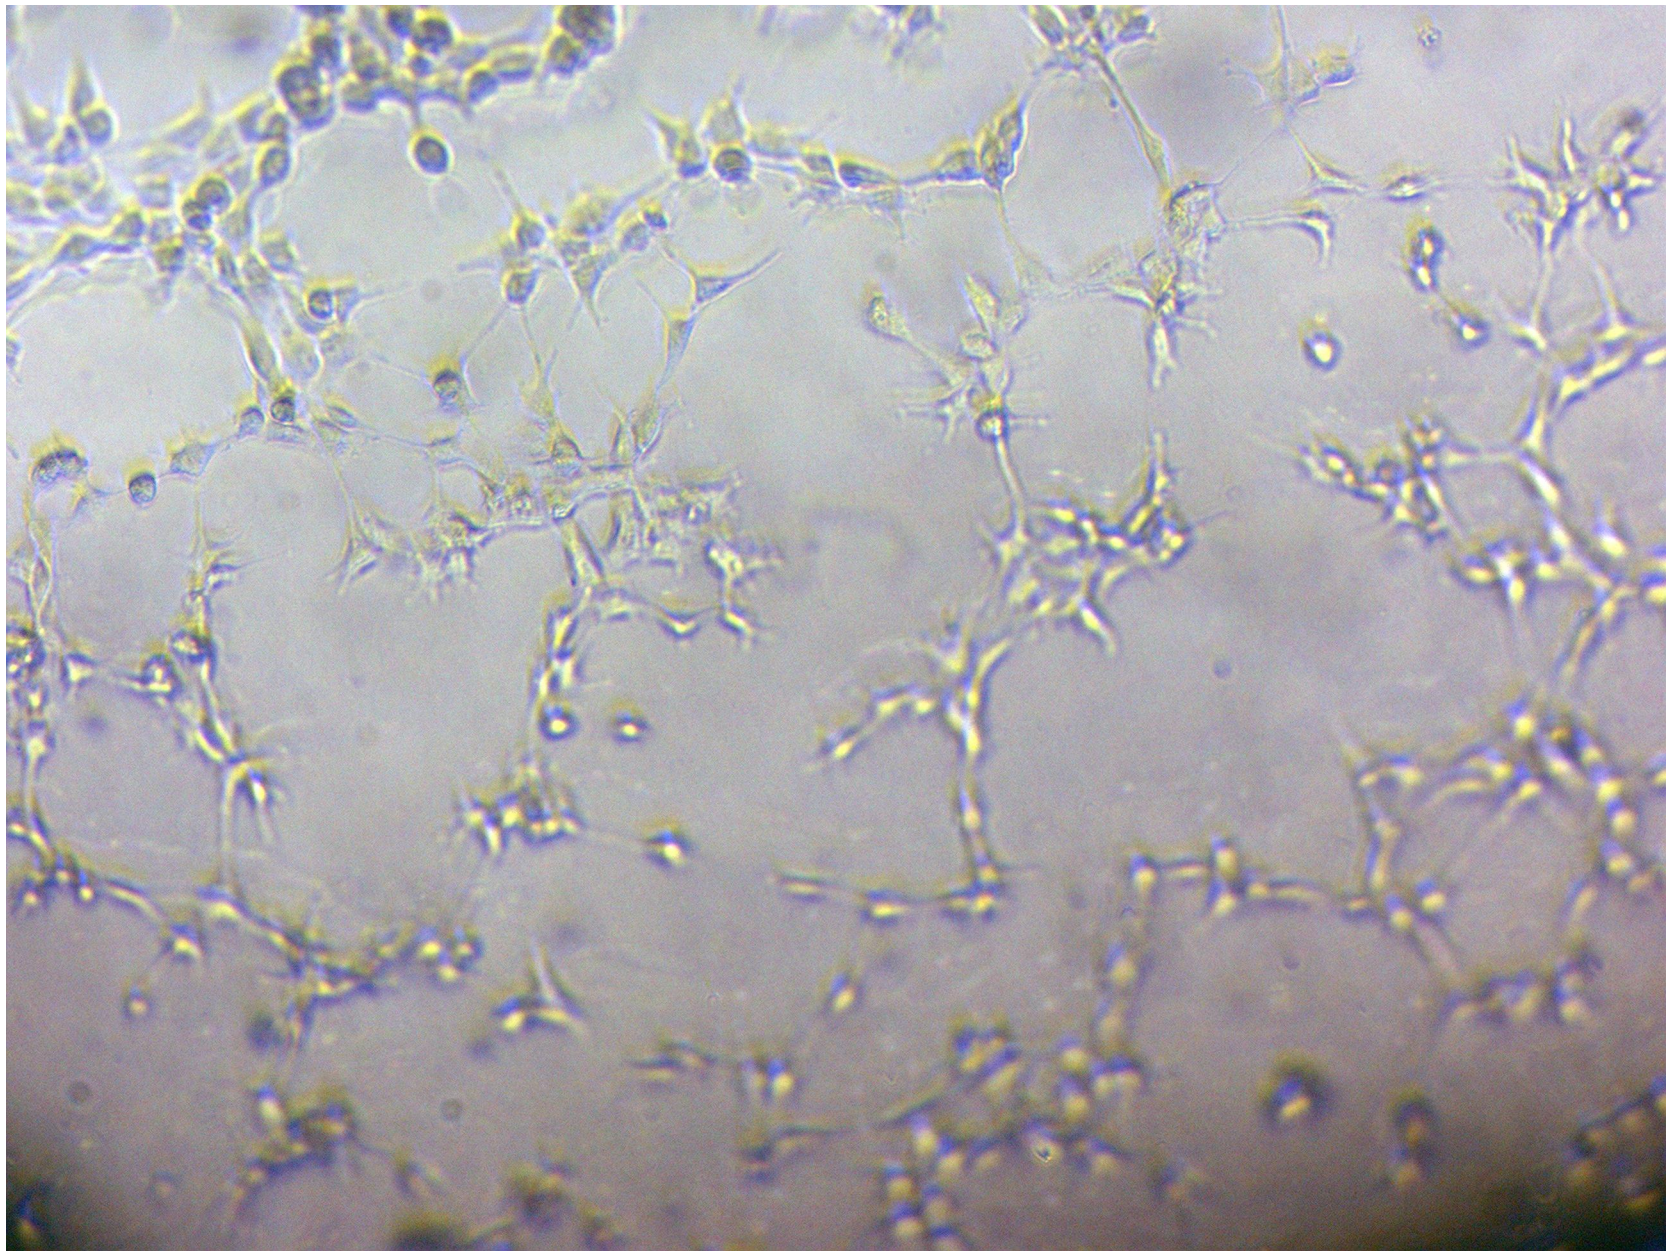

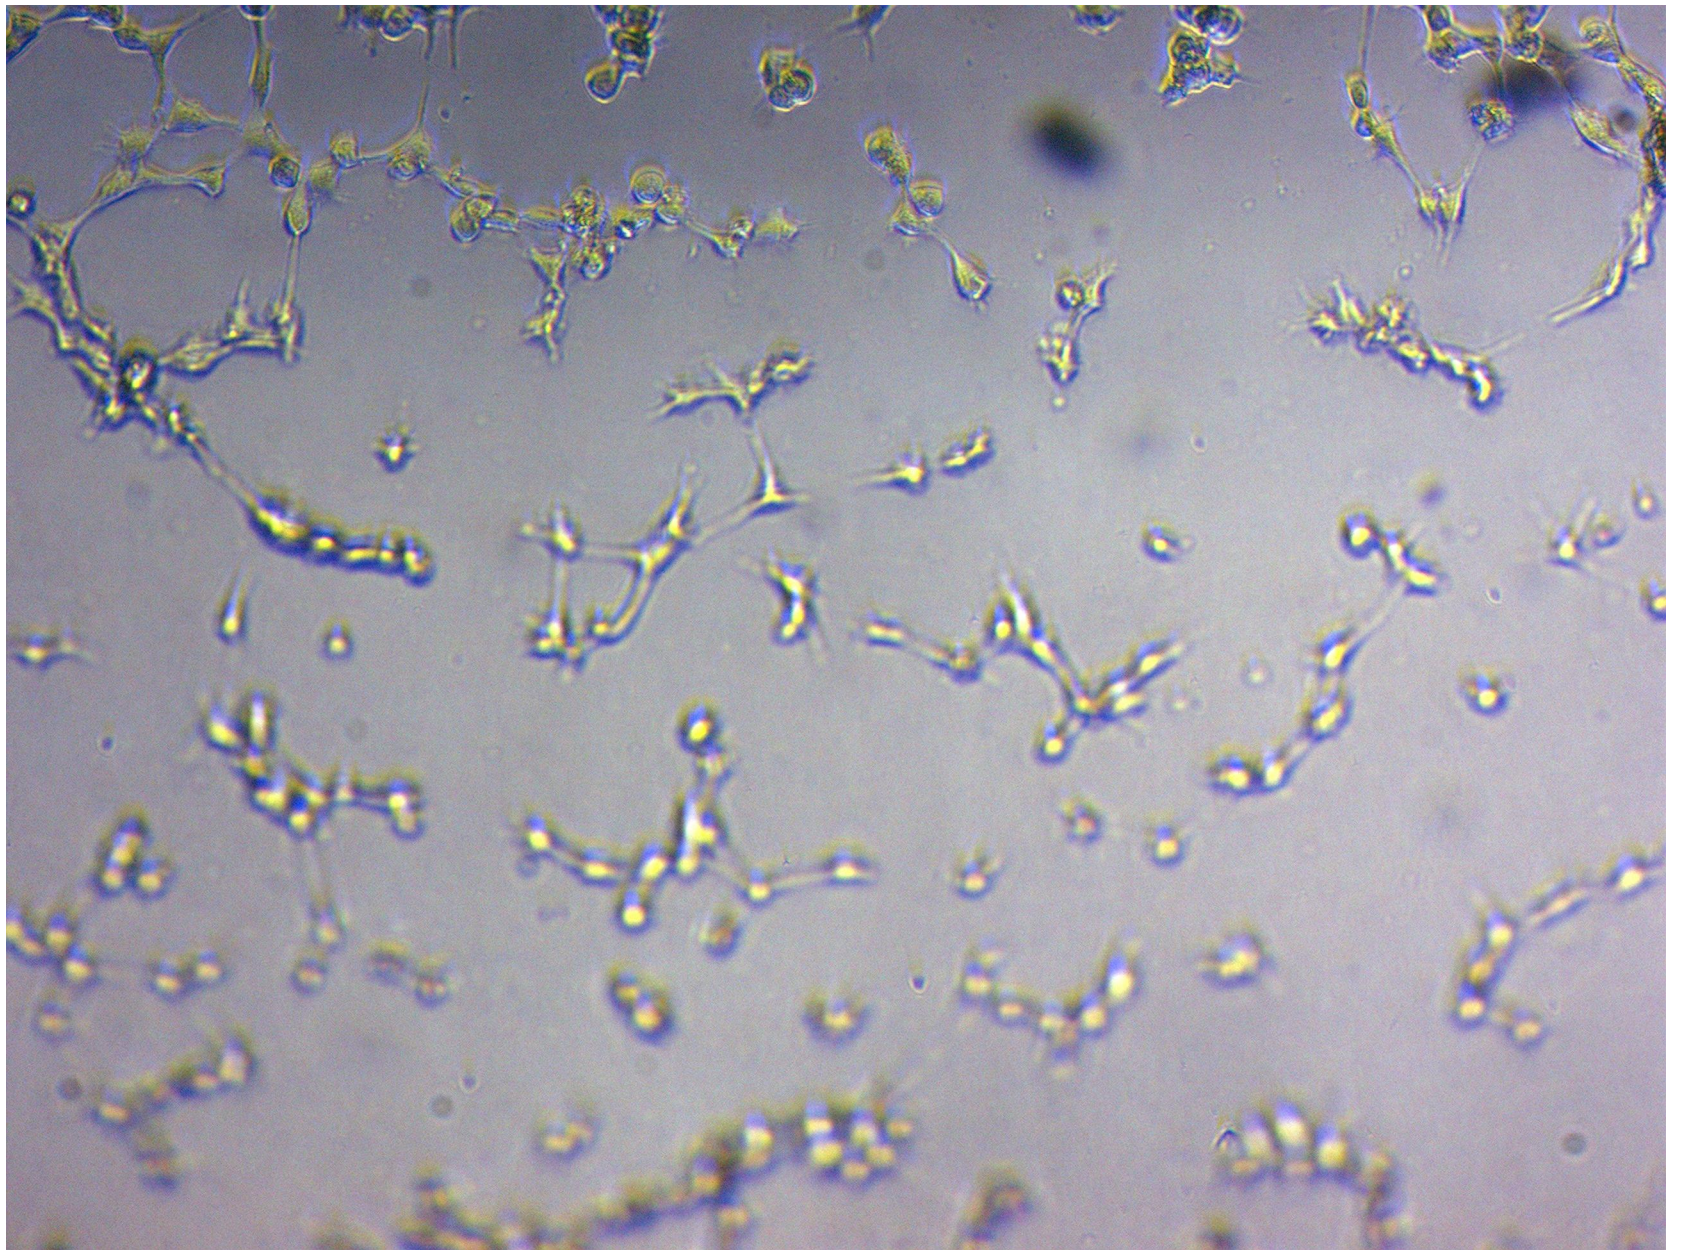

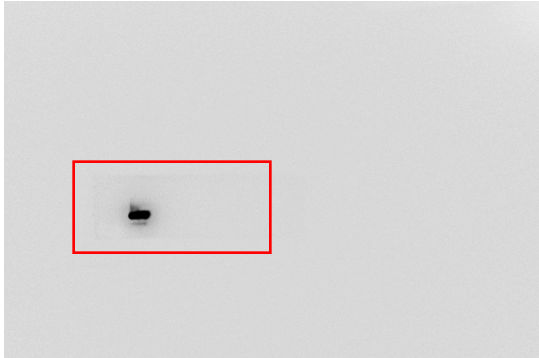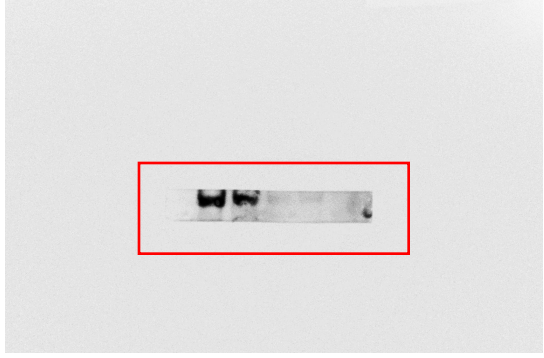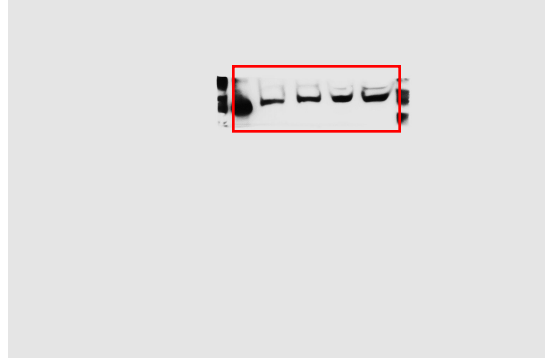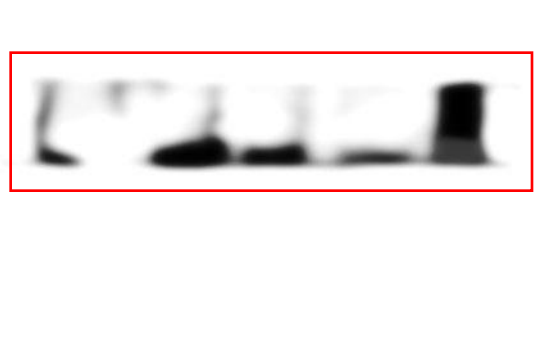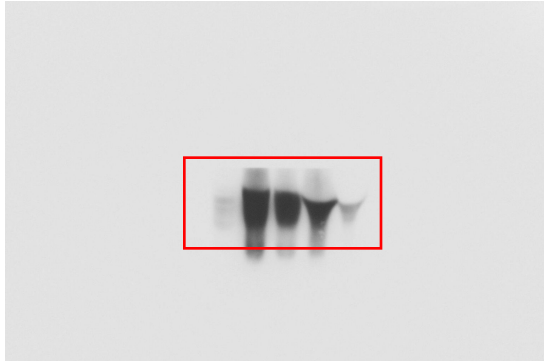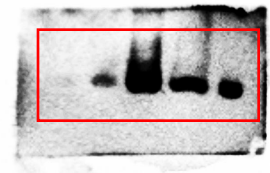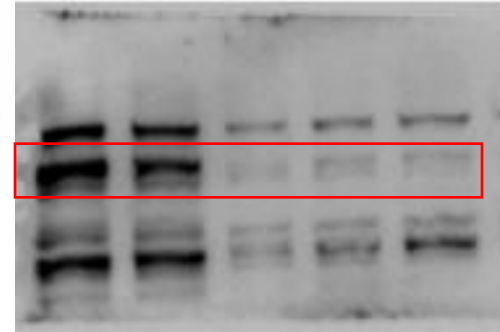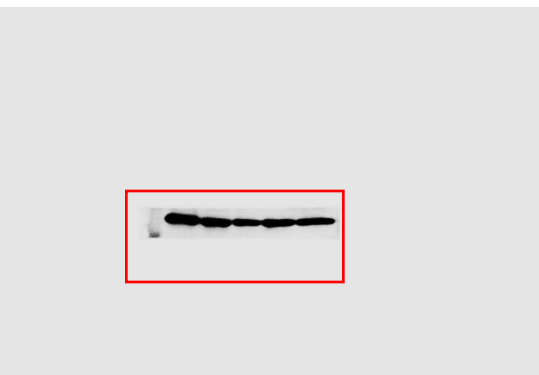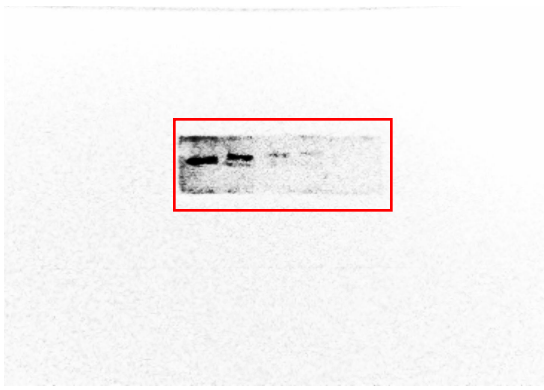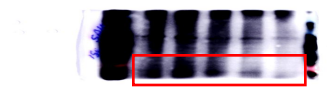

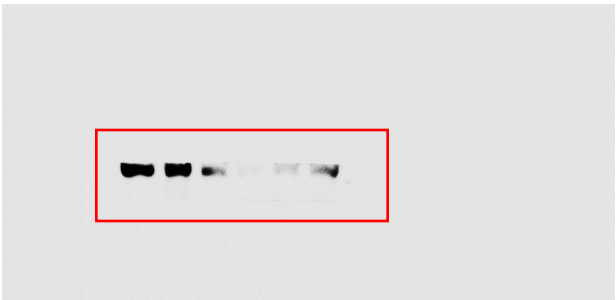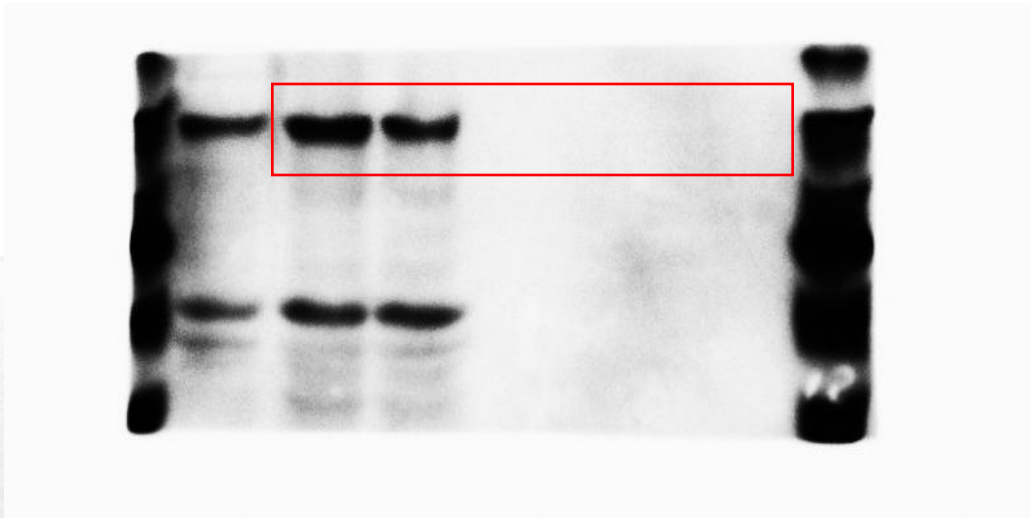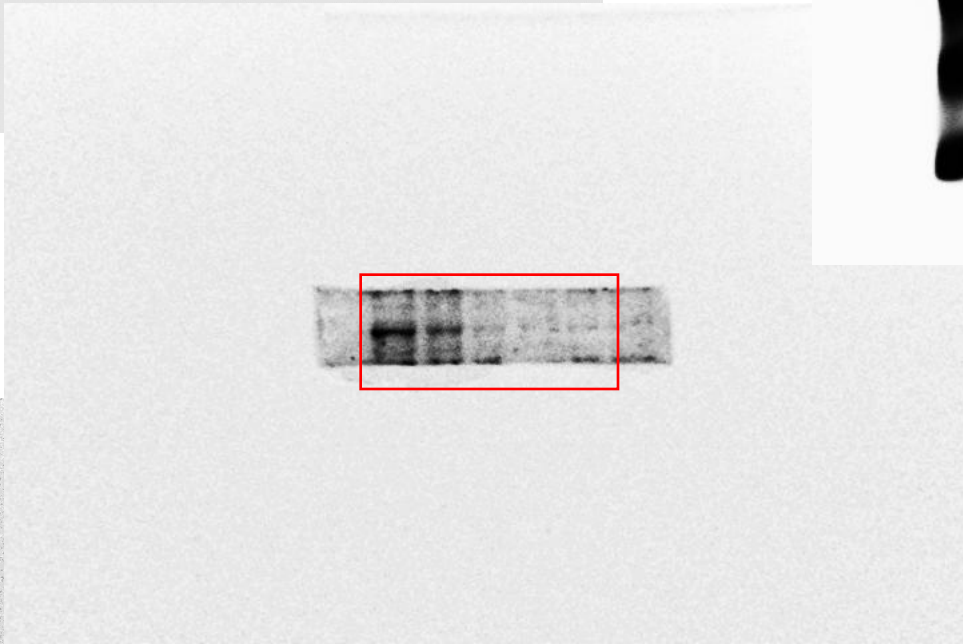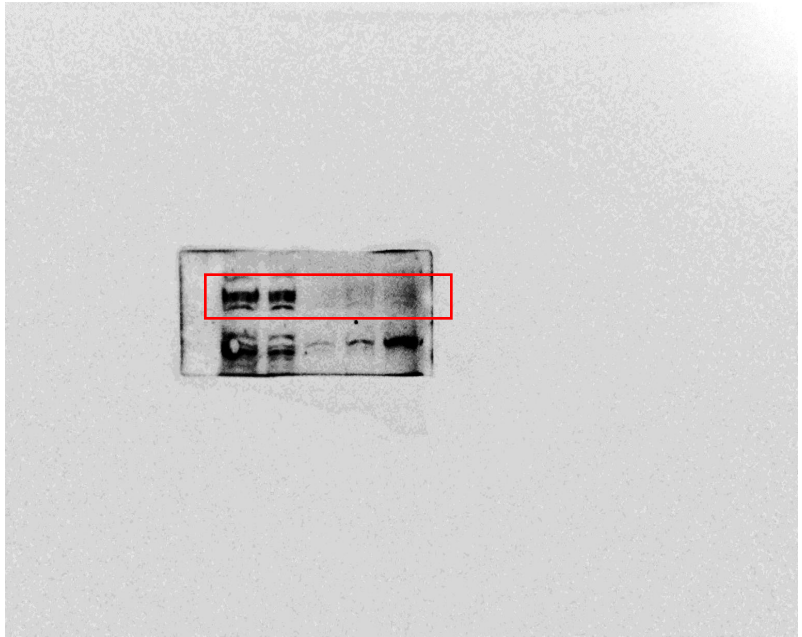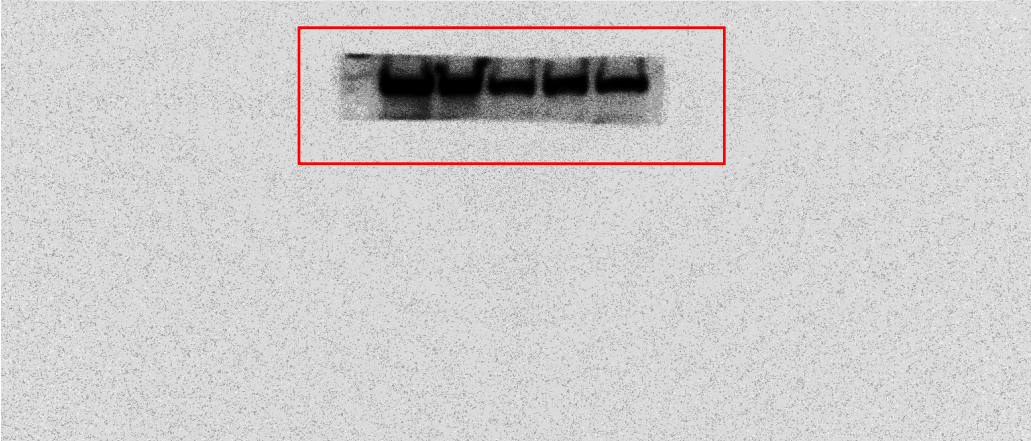

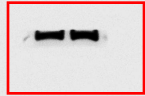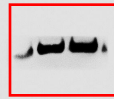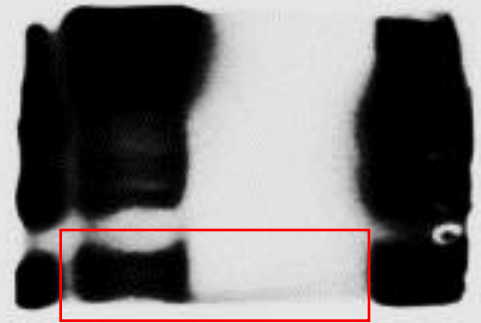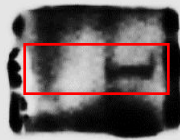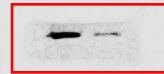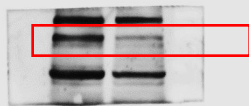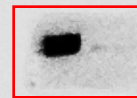

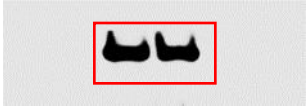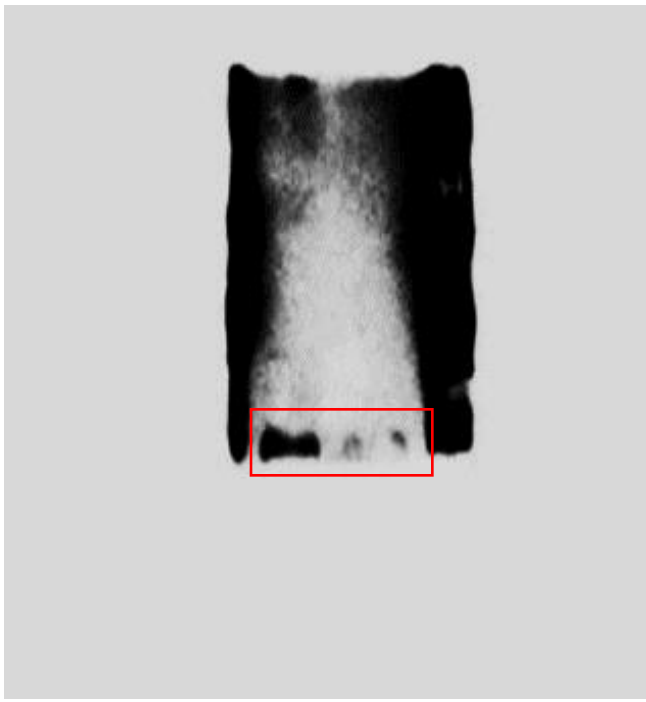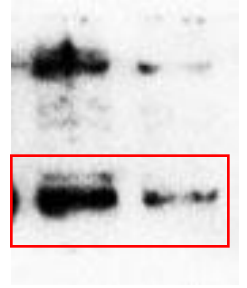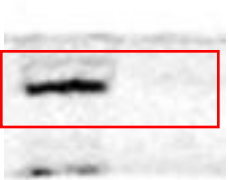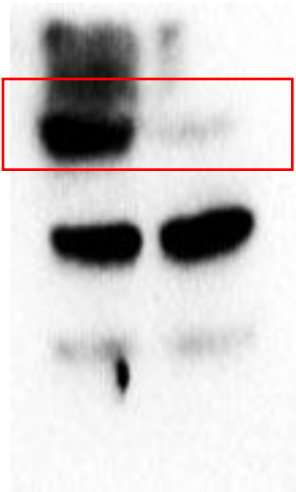

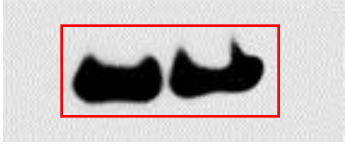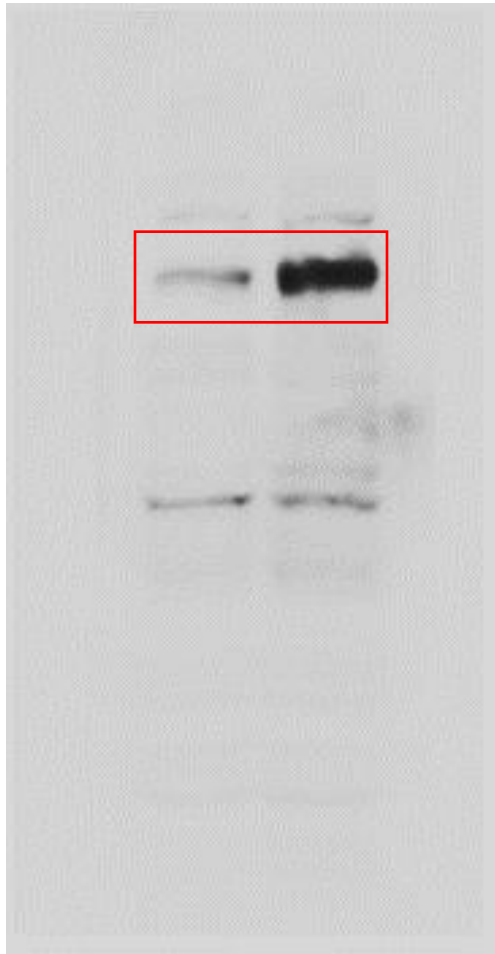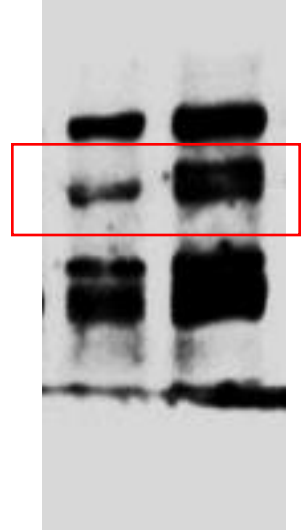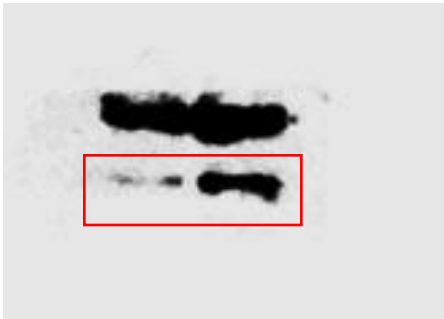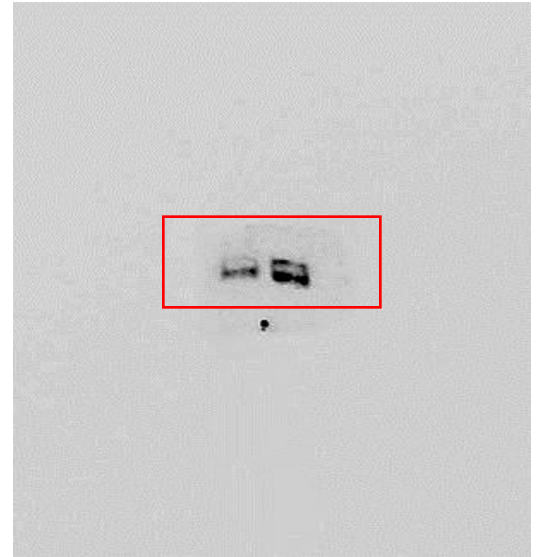

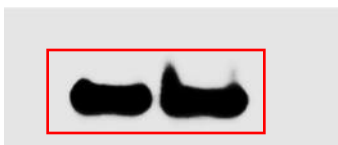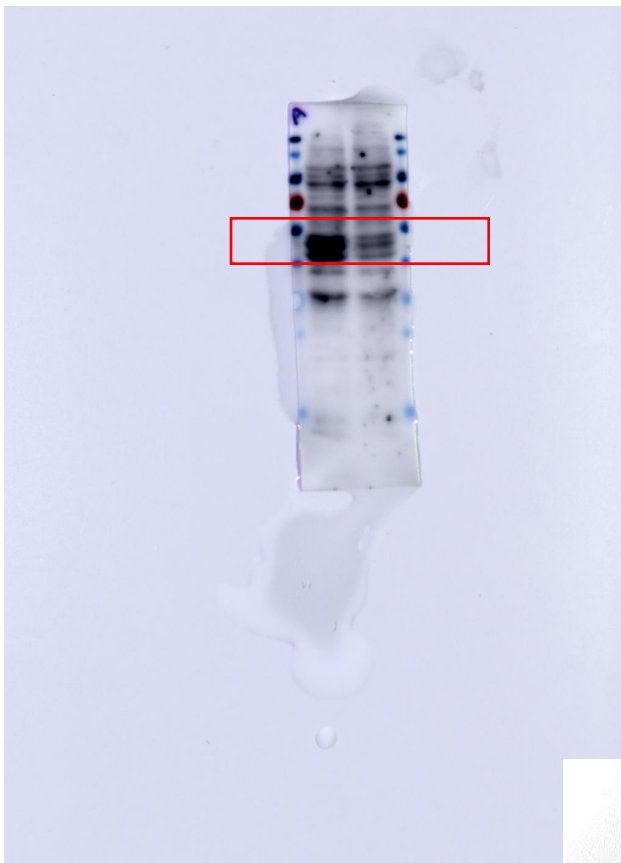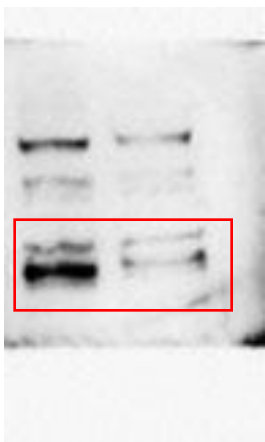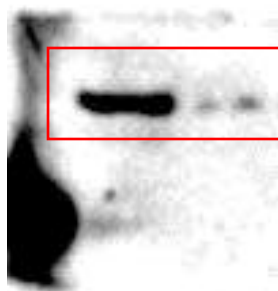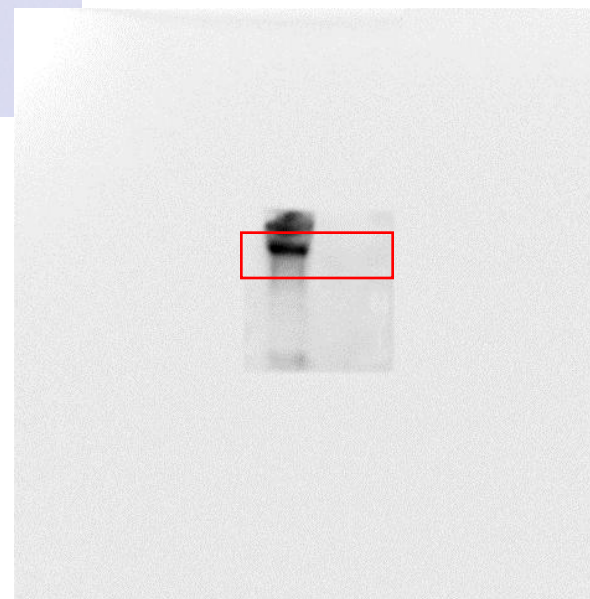



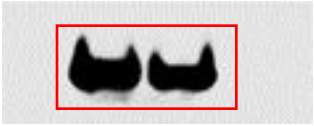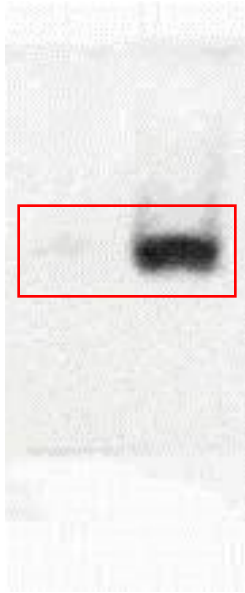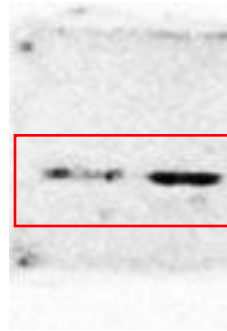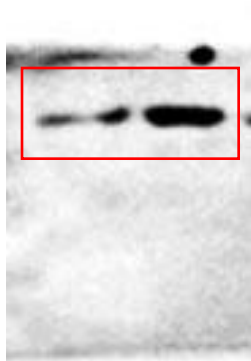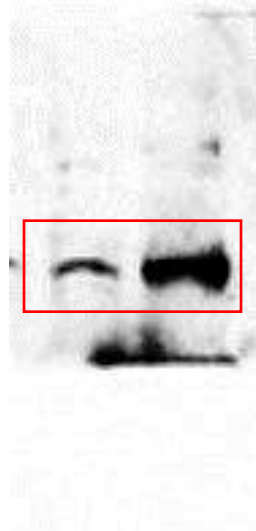

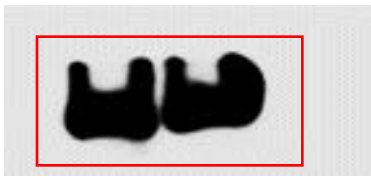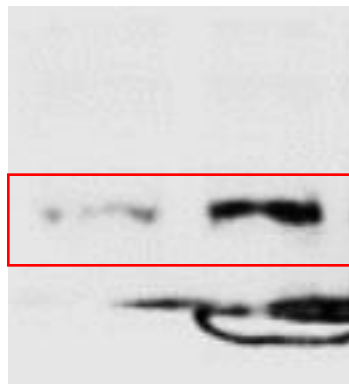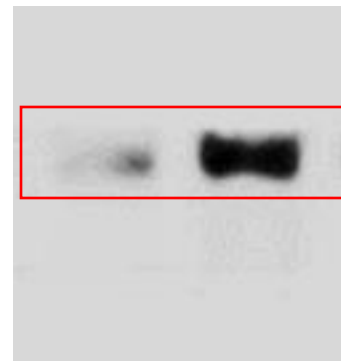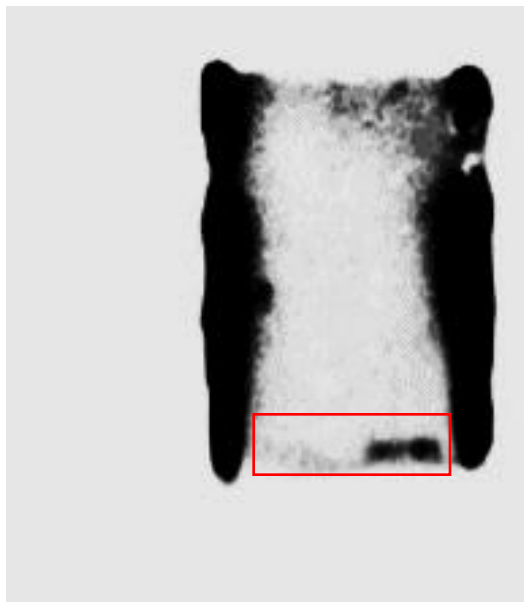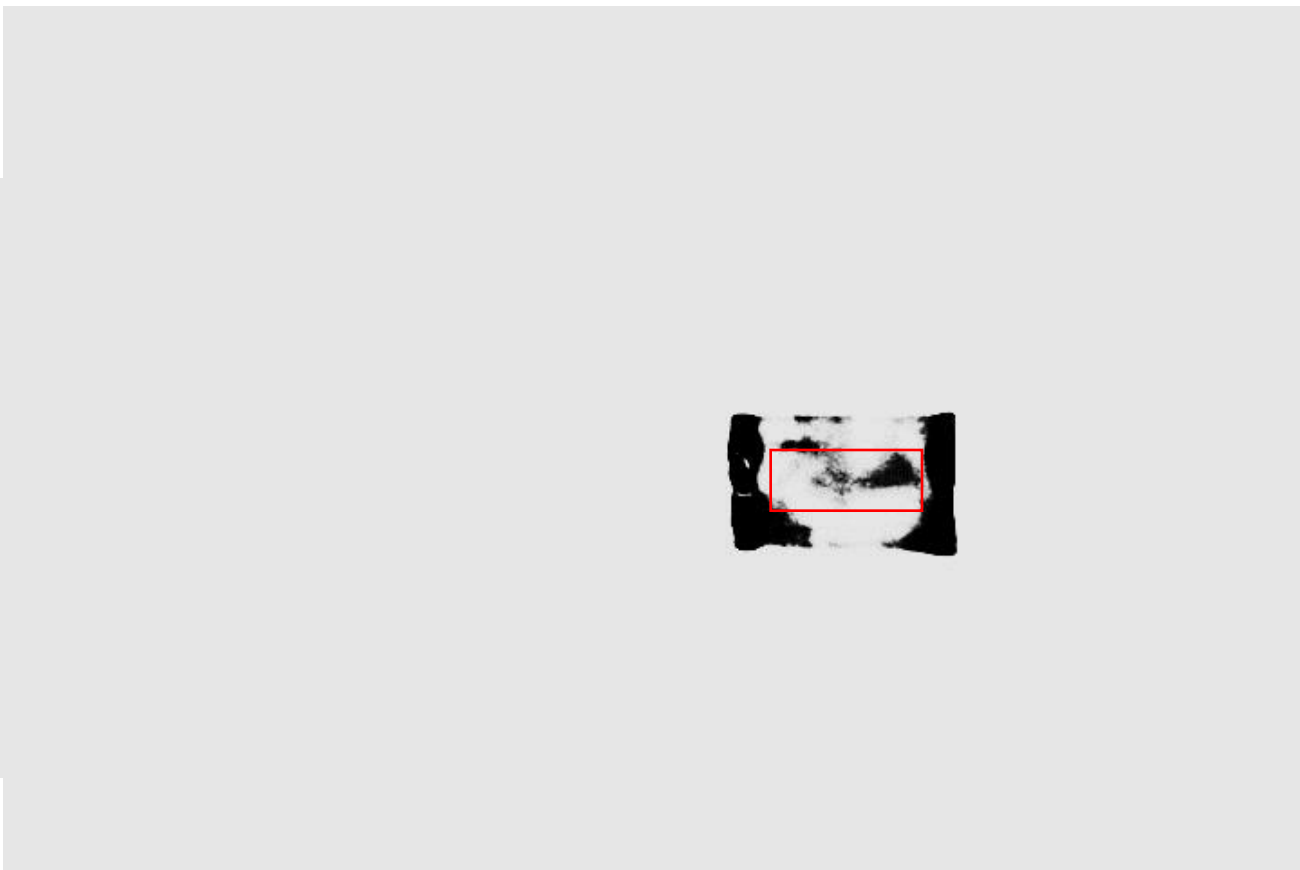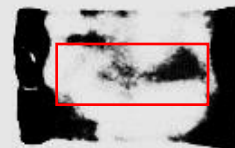

Supplement: MOESM2 [file 25869126]
