# Supplementary material for: SALL4 promotes angiogenesis in gastric cancer by regulating VEGF expression and targeting SALL4/VEGF pathway inhibits cancer progression
Source: Springer Nature journal article supplement (doi:10.1186/s12935-023-02985-9), 2023-07-31
Supplement: MOESM1 [file 25869126]

## Supplementary Materials

### Additional file 1 Table S1 Sequences of siRNA

| siRNA      | Target sequence                                            |
|------------|------------------------------------------------------------|
| Si-Ctrl    | 5'-UUCUCCGAACGUGUCACGUTT-3'<br>5'-ACGUGACACGUUCGGAGAATT-3' |
| Si-SALL4-B | 5'-GUCUCUGGAUGCCUUGAAATT-3'<br>5'-UUUCAAGGCAUCCAGAGACTT-3' |

### Additional file 1 Table S2 Sequences of PCR primers for target gene detection

| Gene           | Sequence                                                           | Size (bp) | T <sub>M</sub> (°C) |
|----------------|--------------------------------------------------------------------|-----------|---------------------|
| $\beta$ -actin | F: 5'-CACGAAACTACCTTCAACTCC-3'<br>R: 5'-CATACTCCTGCTTGCTGATC-3'    | 265       | 60                  |
| SALL4-B        | F: 5'-TCGATGGCCAACTTCCTTC-3'<br>R: 5'-GAGCGGACTCACACTGGAGA-3'      | 142       | 60                  |
| VEGF-A         | F: 5'-AAAGGGTGGAGGTGACTG-3'<br>R: 5'-GACATAAATGACCGAGGC-3'         | 134       | 60                  |
| VEGF-B         | F: 5'-AGTGCTGTGAAGCCAGACA-3'<br>R: 5'-GGAGTGGGATGGGTGATG-3'        | 119       | 60                  |
| VEGF-C         | F: 5'-ATGTGTGTCCGTCTACAGATGT-3'<br>R: 5'-GGAAGTGTGATTGGCAAACTGA-3' | 160       | 60                  |

**Additional file 1 Table S3** Sequences of ChIP-PCR primers and EMSA probes for target gene detection

| <b>Gene</b>             | <b>Sequence</b>                                                                        | <b>Size<br/>(bp)</b> | <b>T<sub>M</sub>(°C)</b> |
|-------------------------|----------------------------------------------------------------------------------------|----------------------|--------------------------|
| <b>ChIP-PCR primers</b> |                                                                                        |                      |                          |
| <b>VEGF-A</b>           | <b>F: 5'- GAAGCAACTCCAGTCCCAAATA-3'</b><br><b>R: 5'- GCTCTGGCTAAAGAGGGAATG-3'</b>      | <b>111</b>           | <b>60</b>                |
| <b>VEGF-B</b>           | <b>F: 5'-AAGGGTTAGACTGAGGTTCTTA-3'</b><br><b>R: 5'-CCTGCAATGGGTCACAATTAAC-3'</b>       | <b>133</b>           | <b>60</b>                |
| <b>VEGF-C</b>           | <b>F: 5'- AACAGCCACACAGAATGGAAGG-3'</b><br><b>R: 5'- TTACAGAGGACCACGCTAAGGG-3'</b>     | <b>229</b>           | <b>60</b>                |
| <b>EMSA probes</b>      |                                                                                        |                      |                          |
| <b>VEGF-A</b>           | <b>5'- AGCTGTTTGGGAGGTCAGAAATAGGG -3'</b><br><b>5'- CCCTATTTCTGACCTCCCAAACAGCT -3'</b> | <b>26</b>            | <b>68</b>                |
| <b>VEGF-B</b>           | <b>5'- ACTTCAGGGACAGCAGGAATTGGA -3'</b><br><b>5'- TCCAATTCCTGCTGTCCCTGAAGT -3'</b>     | <b>24</b>            | <b>68</b>                |
| <b>VEGF-C</b>           | <b>5'-ACCAGATAAGAAAGTCTTCTTCCGG T-3'</b><br><b>5'-A CCGGAAGAAGAGACTTTCTTATCTGGT-3</b>  | <b>28</b>            | <b>67</b>                |

**Additional file 2** Sequences of the putative SALL4-binding site.

A. NC 000006.12:43768209-43770308 Homo sapiens chromosome 6, GRCh38.p13 (VEGF-A)

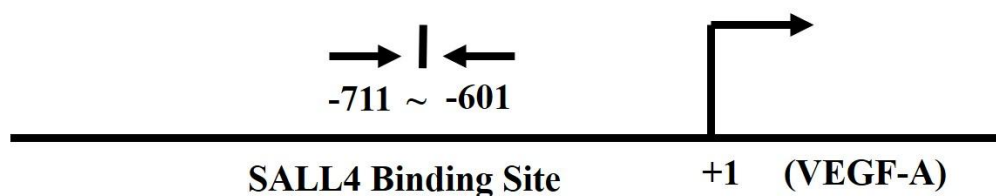

(-711)-GAAGCAACTCCAGTCCCAAATATGTAGCTGTTTGGGAGGTCAGAAATAGGGGGTCCAGGAG  
CAAAC TCCCCCACCCTTTCCAAAGCCATTCCCTCTTTAGCCAGAGC (-601)

B. NC 000011.10:64232584-64234683 Homo sapiens chromosome 11, GRCh38.p13 (VEGF-B)

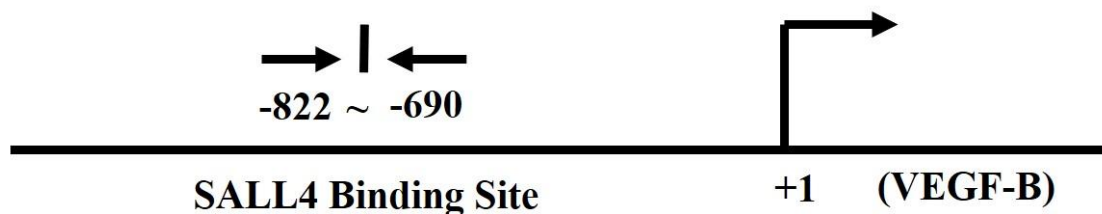

(-822)- AAGGGTTAGACTGAGGTTCCCTAACCCGTGTGTAAGGGTAAAAAGCTGTGAGGCCCTAGA  
GTGGGGTGGAAAGGGGGCAGGACTTCAGGGACAGCAGGAATTGGATTCCAGGGTTAATT  
GTGACCCATTGCAGG (-690)

C. NC 000004.12:c176794922-176792823 Homo sapiens chromosome 4, GRCh38.p13 (VEGF-C)

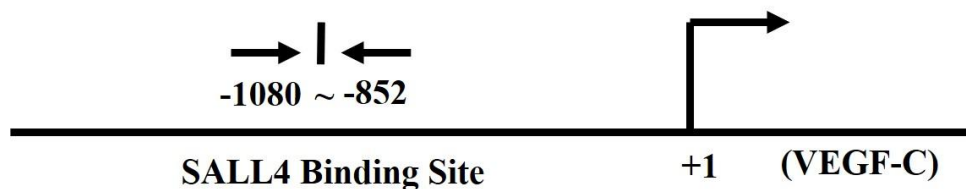

(-1080)-AACAGCCACACAGAATGGAAGGTTCCCTGTCCTTTGAGATATTTAAGCCTTCAAGTAA  
TTATGGGTGAGGAGTTTCAAATCTAGAGTTGAACCAGATAAGAAAGTCTCTTCTTCCGG  
TAAGATATTATGGACCTATAACATCTGTGTACTTAAAAGTAGATTGGGAGTGAAAGGCA  
GACTTTTGATGTTCTGTACACTGTTGAAACCCCTTAGCGTGGTCCTCTGTAA (-852)
